# Supplementary material
Source: ML conference proceedings conference paper supplement (https://openreview.net/forum?id=JzT6KEu2De)
Supplement: supplementary_material [file readme.pdf › readme.pdf]

1. In the output folder, we have stored the examples of different big models generated, which is convenient for reviewers to browse and review.
2. in the xlsx file, we record all the results of the whole large model evaluation and organize them into different sheets.
3. We provide a document on the performance of inductive thinking in the big model, “Human-like intuitive behavior...”, to facilitate reviewers to view the current big model. . We would like to use this literature to give the reviewer a clearer idea about the inductive reasoning stage of the Big Model.
4. We provide a classic literature on the theory of inductive thinking, Scientific thinking final. On page 13, we would like to explain the logical concepts of inductive thinking theory to the reviewer through page 13 to help the reviewer understand.
