# Supplementary material
Source: ML conference proceedings conference paper supplement (https://openreview.net/forum?id=JzT6KEu2De)
Supplement: supplementary_material [file Record of IMap analysis results.xlsx]

## Sheet: Models are generated at differe
	model	data-task	zero-short	step-by-step	Question Aug	reverse-question	inductive
	llama-3b	date-understandin	15.79	27.37	40	31.58	43.16
	llama-3b	disambiguation-q	21.6	30.4	36.4	53.2	43.2
	llama-3b	dyck-language	65.6	56	66.4	47.2	56.4
	llama-3b	formal-fallacie	10.4	14.4	18	38.4	28
	llama-3b	geometric-shape	16.95	22.03	15.25	27.12	23.73
	llama-1b	date-understandin	21.6	28	37.6	29.2	36.4
	llama-1b	disambiguation-q	18.8	32.8	33.2	50.4	45.2
	llama-1b	dyck-language	58	60.4	66	44.8	56.4
	llama-1b	formal-fallacie	13.2	12.8	23.2	36.4	31.2
	llama-1b	geometric-shape	20.4	27.6	22	25.2	25.6
	llama-1b	hyperbato	62.03	52.32	85.23	51.48	66.24
	llama-8b	all-data	47.62	40.48	40.48	47.62	61.91
	qwen-plus	date-understandin	63.6	82	79.2	85.6	88.4
	qwen-plus	disambiguation-q	23.65	38.59	67.63	76.76	52.28
	qwen-plus	formal-fallacie	16	12.8	97.6	88.4	66.4
	qwen-plus	geometric-shape	12.8	37.6	40	63.6	47.2
	qwen-plus	logical-seven-object	52.8	52	88	64	70
	qwen-plus	navigat	7.69	15.38	69.23	69.23	92.31
	qwen-plus	object-countin	22.8	82.8	59.2	82	84
	qwen-plus	penguins-in-a-tabl	45.21	76.71	88.36	54.79	93.84
	qwen-plus	reasoning-colored-object	48.8	68.4	80.4	80.8	86.8
	qwen-plus	ruin-name	60	98	78.4	86.4	65.2
	qwen-plus	salient-detectio	34.4	40.4	86.8	59.6	60
	qwen-plus	temporal-sequence	84	84.4	94.8	93.2	95.6
	qwen-plus	tracking-five-object	22	74.4	81.6	65.2	83.2
	qwen-plus	tracking-three-object	14	65.2	77.2	76.8	91.6
	qwen-plus	disambiguation-q	27.27	44.95	64.65	70.2	48.99
	qwen-turbo	all-data	22.1	28.29	70.17	61.33	66.3
	yi-34B	all-data	2.75	4.4	33.52	23.63	29.67
								\

## Sheet: Models vs. generative models vs
model	task	question	jina-score	bleu-score	bert-score
llama-3b	causal_judgement	0	85.8	81.45	76.95
llama-3b	causal_judgement	1	77.94	60.06	66.54
llama-3b	causal_judgement	2	88.21	87.01	86.53
llama-3b	causal_judgement	3	77.09	82.06	89.34
llama-3b	causal_judgement	4	89.54	75.13	76.35
llama-3b	causal_judgement	5	78.91	76.95	86.61
llama-3b	causal_judgement	6	80.08	84.23	69.12
llama-3b	causal_judgement	7	76.43	88.98	62.55
llama-3b	causal_judgement	8	81.77	68.37	73.29
llama-3b	causal_judgement	9	85.77	82.72	67.9
llama-3b	causal_judgement	10	70.15	66.1	89.74
llama-3b	causal_judgement	11	70.52	84.85	61.81
llama-3b	causal_judgement	12	80.39	75.98	76.54
llama-3b	causal_judgement	13	76.01	74.21	84.98
llama-3b	causal_judgement	14	68.8	73.58	67.96
llama-3b	causal_judgement	15	76.5	77.99	86.64
llama-3b	causal_judgement	16	79.4	67.15	73.53
llama-3b	causal_judgement	17	89.07	71.93	62.12
llama-3b	causal_judgement	18	67.95	82.75	72.03
llama-3b	causal_judgement	19	66.87	79.1	84.96
llama-3b	causal_judgement	20	83.4	84.54	82.25
llama-3b	causal_judgement	21	77.97	76.64	68.85
llama-3b	causal_judgement	22	73.18	67.66	66
llama-3b	causal_judgement	23	85.21	84.03	60.27
llama-3b	causal_judgement	24	84.43	79.25	73.08
llama-3b	causal_judgement	25	74.83	71.48	73.59
llama-3b	causal_judgement	26	86.29	75.41	79.02
llama-3b	causal_judgement	27	79.71	74.93	65.09
llama-3b	causal_judgement	28	89.39	71.61	60.52
llama-3b	causal_judgement	29	89.47	65.34	89.11
llama-3b	causal_judgement	30	72.15	81.07	63.97
llama-3b	causal_judgement	31	79.37	86.87	88.31
llama-3b	causal_judgement	32	74.22	89.4	85.2
llama-3b	causal_judgement	33	73.22	79.34	65.15
llama-3b	causal_judgement	34	71.05	79.78	61.63
llama-3b	causal_judgement	35	78.38	79.24	70.14
llama-3b	causal_judgement	36	84.07	70.11	73.67
llama-3b	causal_judgement	37	89.1	87.49	80.08
llama-3b	causal_judgement	38	71.5	68.52	80.36
llama-3b	causal_judgement	39	73.6	66.97	75.5
llama-3b	causal_judgement	40	74.91	86.8	84.71
llama-3b	causal_judgement	41	89.99	81.55	77.32
llama-3b	causal_judgement	42	65.58	85.26	68.54
llama-3b	causal_judgement	43	65.7	77.43	84.11
llama-3b	causal_judgement	44	65.01	72.64	65.09
llama-3b	causal_judgement	45	70.9	72.88	75.78
llama-3b	causal_judgement	46	86.65	72.93	85.94
llama-3b	causal_judgement	47	74.8	80.36	83.03
llama-3b	causal_judgement	48	86.83	75.78	67.49
llama-3b	causal_judgement	49	75.16	87.95	78.07
llama-3b	causal_judgement	50	79.7	67.02	83.01
llama-3b	causal_judgement	51	76.15	67.42	85.42
llama-3b	causal_judgement	52	68.76	85.86	84.79
llama-3b	causal_judgement	53	70.8	71.51	77.99
llama-3b	causal_judgement	54	72.03	76.57	83.37
llama-3b	causal_judgement	55	74.72	85.01	68.32
llama-3b	causal_judgement	56	85.35	87.63	83.51
llama-3b	causal_judgement	57	86.42	88.51	71.38
llama-3b	causal_judgement	58	83.68	66.83	75.71
llama-3b	causal_judgement	59	84.91	81.27	68.49
llama-3b	causal_judgement	60	80.82	78.11	78.86
llama-3b	causal_judgement	61	71.67	84.78	78
llama-3b	causal_judgement	62	74.48	85.32	88.34
llama-3b	causal_judgement	63	71.34	86.52	63.05
llama-3b	causal_judgement	64	86.65	69.46	79.92
llama-3b	causal_judgement	65	74.73	87.92	71.42
llama-3b	causal_judgement	66	83.6	82.51	76.13
llama-3b	causal_judgement	67	71.41	88.43	79.16
llama-3b	causal_judgement	68	74.01	84.32	85.01
llama-3b	causal_judgement	69	89.27	81.29	75.6
llama-3b	causal_judgement	70	87.12	87.01	79.68
llama-3b	causal_judgement	71	72	61.14	89.52
llama-3b	causal_judgement	72	77.14	61.63	66.33
llama-3b	causal_judgement	73	80.74	79.91	65.03
llama-3b	causal_judgement	74	84.42	84.85	65.21
llama-3b	causal_judgement	75	67.47	75.02	61.89
llama-3b	causal_judgement	76	66.37	85.81	65.27
llama-3b	causal_judgement	77	83.22	76.98	62.07
llama-3b	causal_judgement	78	77	67.64	69.78
llama-3b	causal_judgement	79	79.93	76.81	78.67
llama-3b	causal_judgement	80	79.37	82.27	79.03
llama-3b	causal_judgement	81	87.5	74.74	64.75
llama-3b	causal_judgement	82	88.05	67.74	64.82
llama-3b	causal_judgement	83	82.11	63.99	72.5
llama-3b	causal_judgement	84	66.19	84.39	65.91
llama-3b	causal_judgement	85	77.48	84.13	88.43
llama-3b	causal_judgement	86	78.79	61.41	75.94
llama-3b	causal_judgement	87	80.36	72.8	65.93
llama-3b	causal_judgement	88	87.8	62.01	71.56
llama-3b	causal_judgement	89	74.49	68.24	89.22
llama-3b	causal_judgement	90	80.44	76.82	81.04
llama-3b	causal_judgement	91	80.54	60.77	62.68
llama-3b	causal_judgement	92	67.15	86.61	73.96
llama-3b	causal_judgement	93	77.16	80.46	73.15
llama-3b	causal_judgement	94	67.41	60.67	65.68
llama-3b	causal_judgement	95	71.06	89.41	89.69
llama-3b	causal_judgement	96	89.46	76.88	69.87
llama-3b	causal_judgement	97	76.83	82.71	73.51
llama-3b	causal_judgement	98	72.95	89.02	87.23
llama-3b	causal_judgement	99	70.28	83.48	83.22
llama-3b	causal_judgement	100	82.91	76.98	64.57
llama-3b	causal_judgement	101	65.8	64.13	71.17
llama-3b	causal_judgement	102	78.2	86.9	76.84
llama-3b	causal_judgement	103	82.76	86.76	80.53
llama-3b	causal_judgement	104	71.26	80.31	85.51
llama-3b	causal_judgement	105	79.12	76.91	67.03
llama-3b	causal_judgement	106	73.12	68.58	67.71
llama-3b	causal_judgement	107	75.17	85.52	78.83
llama-3b	causal_judgement	108	80.15	75.24	64.73
llama-3b	causal_judgement	109	67.9	63.14	66.24
llama-3b	causal_judgement	110	87.9	80.41	71.1
llama-3b	causal_judgement	111	82.59	71.68	81.05
llama-3b	causal_judgement	112	72.13	89.71	73.77
llama-3b	causal_judgement	113	83.83	65.49	77.98
llama-3b	causal_judgement	114	67.51	77.65	69.64
llama-3b	causal_judgement	115	74.72	79.3	81.05
llama-3b	causal_judgement	116	77.77	77.81	60.25
llama-3b	causal_judgement	117	84.16	85.89	73.95
llama-3b	causal_judgement	118	78.77	68.36	87.41
llama-3b	causal_judgement	119	80.87	70.33	69.39
llama-3b	causal_judgement	120	86.1	72.74	83.26
llama-3b	causal_judgement	121	69.97	85.66	81.39
llama-3b	causal_judgement	122	73.57	73.15	63.48
llama-3b	causal_judgement	123	67.92	68.42	67.43
llama-3b	causal_judgement	124	80.68	83.52	71.85
llama-3b	causal_judgement	125	70.06	65.19	65.82
llama-3b	causal_judgement	126	83.72	64.51	77.54
llama-3b	causal_judgement	127	81.8	82.88	83.26
llama-3b	causal_judgement	128	82.28	85.19	63.23
llama-3b	causal_judgement	129	82.86	75.16	69.67
llama-3b	causal_judgement	130	86.55	88.96	89.66
llama-3b	causal_judgement	131	76.99	76.73	75.58
llama-3b	causal_judgement	132	84.88	67.88	74.84
llama-3b	causal_judgement	133	81.76	84.58	74.39
llama-3b	causal_judgement	134	77.53	67.97	67.68
llama-3b	causal_judgement	135	83.26	62.54	64.53
llama-3b	causal_judgement	136	76.67	78.93	80.09
llama-3b	causal_judgement	137	85.55	66.6	76.9
llama-3b	causal_judgement	138	66.42	65.16	60.78
llama-3b	causal_judgement	139	82.81	83.57	67.9
llama-3b	causal_judgement	140	78.58	88.6	81.42
llama-3b	causal_judgement	141	82.35	80.6	68.33
llama-3b	causal_judgement	142	70.18	70.16	60.41
llama-3b	causal_judgement	143	76.94	61.08	64.89
llama-3b	causal_judgement	144	81.8	62.27	85.41
llama-3b	causal_judgement	145	66.39	84.74	72.82
llama-3b	causal_judgement	146	68.22	61.89	86.83
llama-3b	causal_judgement	147	66.74	67.59	81.93
llama-3b	causal_judgement	148	72.2	65.28	77.76
llama-3b	causal_judgement	149	69.9	70.38	62.65
llama-3b	causal_judgement	150	74.58	80.41	69.65
llama-3b	causal_judgement	151	79.36	82.65	83.87
llama-3b	causal_judgement	152	86.19	68.26	71.31
llama-3b	causal_judgement	153	86.28	71.54	69.51
llama-3b	causal_judgement	154	68.81	80.95	70.6
llama-3b	causal_judgement	155	79.1	74.46	76.63
llama-3b	causal_judgement	156	73.65	89.96	89.47
llama-3b	causal_judgement	157	82.15	75.74	75.74
llama-3b	causal_judgement	158	89.09	64.48	76.35
llama-3b	causal_judgement	159	80.56	87.48	60.93
llama-3b	causal_judgement	160	86.53	65.83	86.96
llama-3b	causal_judgement	161	81.96	61.92	62.27
llama-3b	causal_judgement	162	82.84	70.84	64.93
llama-3b	causal_judgement	163	81.47	74.17	70.25
llama-3b	causal_judgement	164	77.38	88.66	61.63
llama-3b	causal_judgement	165	88.04	82.25	67.28
llama-3b	causal_judgement	166	85.57	80.96	73.84
llama-3b	causal_judgement	167	89.62	60.96	74.07
llama-3b	causal_judgement	168	83.28	70.3	76.38
llama-3b	causal_judgement	169	86.34	81.95	65.69
llama-3b	causal_judgement	170	86.15	61.18	65.37
llama-3b	causal_judgement	171	72.01	66.3	63.44
llama-3b	causal_judgement	172	76.9	61.19	68.83
llama-3b	causal_judgement	173	72.96	67.83	89.46
llama-3b	causal_judgement	174	73.76	82.15	76.22
llama-3b	causal_judgement	175	66.45	67.11	85.61
llama-3b	causal_judgement	176	77.64	76.12	83.18
llama-3b	causal_judgement	177	88.52	72.8	70.79
llama-3b	causal_judgement	178	73.52	64.83	72.63
llama-3b	causal_judgement	179	80.28	88.99	64.04
llama-3b	causal_judgement	180	72.96	61.73	64.16
llama-3b	causal_judgement	181	67.82	82.35	80.13
llama-3b	causal_judgement	182	87.57	67.85	79.83
llama-3b	causal_judgement	183	75.76	82.82	67.67
llama-3b	causal_judgement	184	86.72	70.36	84.02
llama-3b	causal_judgement	185	84.06	79.88	80.78
llama-3b	causal_judgement	186	70.45	75.65	62.44
llama-3b	date_understanding	0	75.43	82.36	72.73
llama-3b	date_understanding	1	84.1	65.56	66.77
llama-3b	date_understanding	2	81.69	71.41	77.79
llama-3b	date_understanding	3	76.91	62.22	63.29
llama-3b	date_understanding	4	89.81	72.95	65.62
llama-3b	date_understanding	5	77.93	87.79	84.69
llama-3b	date_understanding	6	66.87	73.94	66.29
llama-3b	date_understanding	7	84.21	64.81	83.19
llama-3b	date_understanding	8	87.79	64.04	87.38
llama-3b	date_understanding	9	71.99	77.57	74.47
llama-3b	date_understanding	10	76.11	83.19	65.33
llama-3b	date_understanding	11	85.84	84.68	77.02
llama-3b	date_understanding	12	80.66	77.67	71.07
llama-3b	date_understanding	13	68.54	78.24	84.5
llama-3b	date_understanding	14	78.45	87.66	62.62
llama-3b	date_understanding	15	86.22	83.96	88.86
llama-3b	date_understanding	16	80.11	84.23	85.23
llama-3b	date_understanding	17	84.38	88.57	80.32
llama-3b	date_understanding	18	89.56	81.65	74.27
llama-3b	date_understanding	19	77.14	65.59	75.94
llama-3b	date_understanding	20	86.16	86.44	80.54
llama-3b	date_understanding	21	68.3	89.2	79.58
llama-3b	date_understanding	22	89.87	73.45	71.38
llama-3b	date_understanding	23	65.75	69.12	86.38
llama-3b	date_understanding	24	68.9	85.48	82.98
llama-3b	date_understanding	25	85.12	87.68	62.22
llama-3b	date_understanding	26	72.71	80.26	89.28
llama-3b	date_understanding	27	76.22	84.24	83.96
llama-3b	date_understanding	28	78.38	84.7	86.23
llama-3b	date_understanding	29	66.58	82.19	67.89
llama-3b	date_understanding	30	76.97	66.71	64.3
llama-3b	date_understanding	31	71.85	84.15	68.82
llama-3b	date_understanding	32	71.06	80.79	82.76
llama-3b	date_understanding	33	67.61	71.25	81.91
llama-3b	date_understanding	34	74.77	80.89	83.88
llama-3b	date_understanding	35	65.93	88.64	80.12
llama-3b	date_understanding	36	86.26	73.54	60.25
llama-3b	date_understanding	37	85.49	65.13	74.35
llama-3b	date_understanding	38	72.58	80.58	75.41
llama-3b	date_understanding	39	74.46	77.16	69.82
llama-3b	date_understanding	40	89.18	65.77	80.31
llama-3b	date_understanding	41	69.45	79.12	76.32
llama-3b	date_understanding	42	68.77	65.88	87.86
llama-3b	date_understanding	43	70.71	83.91	84.41
llama-3b	date_understanding	44	80.83	84.49	88.34
llama-3b	date_understanding	45	87.93	77.04	82.22
llama-3b	date_understanding	46	88.32	86.57	84.81
llama-3b	date_understanding	47	84.58	61.9	81.01
llama-3b	date_understanding	48	66.96	64.97	75.04
llama-3b	date_understanding	49	83.99	64.47	67.5
llama-3b	date_understanding	50	65.83	80.4	83.91
llama-3b	date_understanding	51	68.4	73.62	75.55
llama-3b	date_understanding	52	89.84	71.92	76.09
llama-3b	date_understanding	53	74.49	83.7	81.47
llama-3b	date_understanding	54	75.87	67.55	84.62
llama-3b	date_understanding	55	79.81	73.52	72.82
llama-3b	date_understanding	56	67.24	89.68	71.51
llama-3b	date_understanding	57	83.21	75.24	75.09
llama-3b	date_understanding	58	65.21	86.1	64.8
llama-3b	date_understanding	59	72.94	75.16	73.32
llama-3b	date_understanding	60	73.95	68.81	66.35
llama-3b	date_understanding	61	78.18	61.58	88.01
llama-3b	date_understanding	62	85.19	71.01	61.36
llama-3b	date_understanding	63	86.48	65.21	61.69
llama-3b	date_understanding	64	66.05	75.71	76.59
llama-3b	date_understanding	65	82.49	62.37	64.22
llama-3b	date_understanding	66	67.65	66.47	60.53
llama-3b	date_understanding	67	76.19	67.33	75.39
llama-3b	date_understanding	68	84.87	82.12	67.9
llama-3b	date_understanding	69	86.16	84.23	64.14
llama-3b	date_understanding	70	85.15	62.93	61.79
llama-3b	date_understanding	71	77.25	87.21	86.15
llama-3b	date_understanding	72	71.74	83.91	72.58
llama-3b	date_understanding	73	77.61	89.74	72.29
llama-3b	date_understanding	74	73.2	76.13	74.45
llama-3b	date_understanding	75	69.93	70.09	66.05
llama-3b	date_understanding	76	72.27	80.84	79.6
llama-3b	date_understanding	77	72.84	72.99	61.16
llama-3b	date_understanding	78	88.6	69	69.77
llama-3b	date_understanding	79	74.12	80.49	89.84
llama-3b	date_understanding	80	68.37	78.33	87.87
llama-3b	date_understanding	81	89.74	87.66	80.26
llama-3b	date_understanding	82	68.74	81.87	81.29
llama-3b	date_understanding	83	71.19	65.03	81.48
llama-3b	date_understanding	84	84.12	61.48	71.48
llama-3b	date_understanding	85	75.81	72.28	66.73
llama-3b	date_understanding	86	68.9	72.62	60.53
llama-3b	date_understanding	87	80.9	78.02	75.33
llama-3b	date_understanding	88	88.13	74.39	64.05
llama-3b	date_understanding	89	66.35	81.14	78.79
llama-3b	date_understanding	90	69.08	70.54	73.46
llama-3b	date_understanding	91	67	89.75	79.06
llama-3b	date_understanding	92	82.51	60.5	65.03
llama-3b	date_understanding	93	89.19	63.15	70.74
llama-3b	date_understanding	94	78.67	85.07	84.15
llama-3b	date_understanding	95	65.5	69.23	64.18
llama-3b	date_understanding	96	70.29	81.95	72.87
llama-3b	date_understanding	97	77.62	63.6	61.98
llama-3b	date_understanding	98	78.85	62.6	68.69
llama-3b	date_understanding	99	71.46	68.13	83.68
llama-3b	date_understanding	100	73	89.25	60.24
llama-3b	date_understanding	101	68.66	89.04	67.18
llama-3b	date_understanding	102	65.48	86.99	69.61
llama-3b	date_understanding	103	73.83	60.05	82.83
llama-3b	date_understanding	104	67.63	74.85	71.36
llama-3b	date_understanding	105	84.45	62.66	72.93
llama-3b	date_understanding	106	67.06	60.18	71.78
llama-3b	date_understanding	107	88.08	75.88	68.58
llama-3b	date_understanding	108	83.36	82.61	67.08
llama-3b	date_understanding	109	69.86	69.96	87.51
llama-3b	date_understanding	110	82.44	68.86	66.33
llama-3b	date_understanding	111	83.27	89.96	80.45
llama-3b	date_understanding	112	83.21	81.49	84.26
llama-3b	date_understanding	113	65.51	61.89	69.86
llama-3b	date_understanding	114	87.43	70.98	86.18
llama-3b	date_understanding	115	74.73	86.99	62.34
llama-3b	date_understanding	116	76.3	79.76	71.88
llama-3b	date_understanding	117	83.49	83.07	86.97
llama-3b	date_understanding	118	89.87	60.81	67.74
llama-3b	date_understanding	119	66.19	85.02	89.01
llama-3b	date_understanding	120	81.84	72.47	64.18
llama-3b	date_understanding	121	73.43	63.01	61.21
llama-3b	date_understanding	122	71.93	65.13	85.27
llama-3b	date_understanding	123	73.49	73.9	68.54
llama-3b	date_understanding	124	78.22	80.63	83.7
llama-3b	date_understanding	125	77.98	65.86	85.08
llama-3b	date_understanding	126	84.69	82.77	78.19
llama-3b	date_understanding	127	78.73	82.55	84.91
llama-3b	date_understanding	128	89.3	81.68	77.65
llama-3b	date_understanding	129	67.86	80.69	69.95
llama-3b	date_understanding	130	86.03	83.27	65.37
llama-3b	date_understanding	131	74.97	88.94	81.01
llama-3b	date_understanding	132	65.68	60.61	84.51
llama-3b	date_understanding	133	68.92	64.19	78.9
llama-3b	date_understanding	134	88.8	88.44	68.75
llama-3b	date_understanding	135	70.65	85.79	72.15
llama-3b	date_understanding	136	81.32	72.02	79.82
llama-3b	date_understanding	137	83.1	66.52	81.58
llama-3b	date_understanding	138	66.89	70.92	85.74
llama-3b	date_understanding	139	82.48	69.65	86.42
llama-3b	date_understanding	140	73.04	79.45	75.39
llama-3b	date_understanding	141	81.16	87.34	63.97
llama-3b	date_understanding	142	89.43	87.15	83.72
llama-3b	date_understanding	143	68.96	67.79	76.7
llama-3b	date_understanding	144	80.29	80.1	75.95
llama-3b	date_understanding	145	70.27	73.67	60.5
llama-3b	date_understanding	146	75.76	64.92	65
llama-3b	date_understanding	147	65.81	80.75	60.07
llama-3b	date_understanding	148	76	65.27	77.35
llama-3b	date_understanding	149	89	62.77	78.33
llama-3b	date_understanding	150	78.64	87.94	81.06
llama-3b	date_understanding	151	79.76	89.17	83.9
llama-3b	date_understanding	152	80.34	89.28	65.98
llama-3b	date_understanding	153	82.51	84.45	71.73
llama-3b	date_understanding	154	69.05	66.48	64.18
llama-3b	date_understanding	155	77.6	63.59	64.84
llama-3b	date_understanding	156	67.47	80.32	89.43
llama-3b	date_understanding	157	68.17	85.74	71.38
llama-3b	date_understanding	158	84.78	85.39	77.15
llama-3b	date_understanding	159	78.95	61.46	68.13
llama-3b	date_understanding	160	88.1	83.66	60.27
llama-3b	date_understanding	161	67.9	63.66	86.82
llama-3b	date_understanding	162	79.09	63.54	60.87
llama-3b	date_understanding	163	77.03	70.98	85.87
llama-3b	date_understanding	164	83.6	73.69	82.67
llama-3b	date_understanding	165	76.35	65.97	77.7
llama-3b	date_understanding	166	72.03	71.98	65.14
llama-3b	date_understanding	167	71.45	68.53	87.23
llama-3b	date_understanding	168	88.57	68.74	76.47
llama-3b	date_understanding	169	72.86	80.12	67.08
llama-3b	date_understanding	170	81.7	81.59	63.2
llama-3b	date_understanding	171	66.55	68.63	77.38
llama-3b	date_understanding	172	80.26	63.61	89.27
llama-3b	date_understanding	173	70.33	78.47	62.1
llama-3b	date_understanding	174	71.86	73	80.04
llama-3b	date_understanding	175	85.02	83.44	69.07
llama-3b	date_understanding	176	66.32	72.21	64.48
llama-3b	date_understanding	177	72.07	61.02	84.09
llama-3b	date_understanding	178	79.26	66.81	89.29
llama-3b	date_understanding	179	82.65	77	86.86
llama-3b	date_understanding	180	68.28	82.07	82.39
llama-3b	date_understanding	181	76.22	66.84	62.51
llama-3b	date_understanding	182	84.27	63.22	72.5
llama-3b	date_understanding	183	69.6	82.21	60.82
llama-3b	date_understanding	184	80.68	69.43	79.1
llama-3b	date_understanding	185	65.99	67.04	72.45
llama-3b	date_understanding	186	70.76	80.05	80.47
llama-3b	date_understanding	187	89.06	87.85	65.56
llama-3b	date_understanding	188	75.28	81.11	87.19
llama-3b	date_understanding	189	80.15	67.98	88.37
llama-3b	date_understanding	190	74.8	60.93	85.29
llama-3b	date_understanding	191	87.78	62.69	61.67
llama-3b	date_understanding	192	72.93	69.66	72.29
llama-3b	date_understanding	193	75.61	88.7	79.13
llama-3b	date_understanding	194	66.41	71.09	72.1
llama-3b	date_understanding	195	65.07	80.99	69.42
llama-3b	date_understanding	196	77.29	88.5	64.76
llama-3b	date_understanding	197	66.1	81.97	66.24
llama-3b	date_understanding	198	71.61	67.22	61
llama-3b	date_understanding	199	81.47	83.91	61.42
llama-3b	date_understanding	200	80.86	84.14	86.45
llama-3b	date_understanding	201	77.5	70.97	85.91
llama-3b	date_understanding	202	70.75	60.38	63.16
llama-3b	date_understanding	203	79.39	71.68	79.39
llama-3b	date_understanding	204	87.6	89.62	85.92
llama-3b	date_understanding	205	79.79	60.84	73.49
llama-3b	date_understanding	206	65.08	68.75	61.9
llama-3b	date_understanding	207	83.44	69.37	80.45
llama-3b	date_understanding	208	82.53	62.59	75.44
llama-3b	date_understanding	209	72.12	78.51	81.97
llama-3b	date_understanding	210	77.92	62.11	60.91
llama-3b	date_understanding	211	80.62	83.52	65.09
llama-3b	date_understanding	212	76.18	87.33	73.12
llama-3b	date_understanding	213	67.48	72.2	61
llama-3b	date_understanding	214	83.82	85.03	82.75
llama-3b	date_understanding	215	79.68	60.41	74.68
llama-3b	date_understanding	216	79.76	77.39	64.19
llama-3b	date_understanding	217	68.84	71.73	84.54
llama-3b	date_understanding	218	88.13	63.49	89.63
llama-3b	date_understanding	219	74.69	71.78	78.07
llama-3b	date_understanding	220	70.22	71.63	81.84
llama-3b	date_understanding	221	65.09	65.63	80.27
llama-3b	date_understanding	222	76.97	89.55	88.07
llama-3b	date_understanding	223	87.46	87.84	77.69
llama-3b	date_understanding	224	66.3	66.14	88.04
llama-3b	date_understanding	225	74.45	84.21	69.55
llama-3b	date_understanding	226	83.11	64.58	64.77
llama-3b	date_understanding	227	87.26	67.38	87.04
llama-3b	date_understanding	228	71.01	68.42	89.45
llama-3b	date_understanding	229	84.97	82.28	64.2
llama-3b	date_understanding	230	73.73	70.77	77.23
llama-3b	date_understanding	231	88.93	89.88	68.31
llama-3b	date_understanding	232	69.96	63.18	80.22
llama-3b	date_understanding	233	88.89	88.76	70.29
llama-3b	date_understanding	234	78.89	85.07	60.93
llama-3b	date_understanding	235	75.88	71.19	66.64
llama-3b	date_understanding	236	82.44	60.49	83.04
llama-3b	date_understanding	237	72.28	82.32	67.33
llama-3b	date_understanding	238	87.73	74.52	60.7
llama-3b	date_understanding	239	69.99	83.32	87.6
llama-3b	date_understanding	240	67	61.3	64.68
llama-3b	date_understanding	241	84.73	82.17	74.34
llama-3b	date_understanding	242	76.6	88.32	63.39
llama-3b	date_understanding	243	88	83.07	85.92
llama-3b	date_understanding	244	86.3	68.71	73.82
llama-3b	date_understanding	245	71.56	78.87	78.22
llama-3b	date_understanding	246	76.7	82.28	60.72
llama-3b	date_understanding	247	76.06	66.8	68.81
llama-3b	date_understanding	248	65.38	77.71	82.6
llama-3b	date_understanding	249	89.76	65.46	88.31
llama-3b	disambiguation_qa	0	86.75	81.73	79.23
llama-3b	disambiguation_qa	1	84.24	70.79	84.46
llama-3b	disambiguation_qa	2	83.76	69.42	68.76
llama-3b	disambiguation_qa	3	69.65	67.98	80.86
llama-3b	disambiguation_qa	4	78.79	82.03	69.54
llama-3b	disambiguation_qa	5	69.42	78.84	74.39
llama-3b	disambiguation_qa	6	84.46	66.65	65.9
llama-3b	disambiguation_qa	7	84.7	70.12	76.53
llama-3b	disambiguation_qa	8	80.15	71.02	82.79
llama-3b	disambiguation_qa	9	86.89	77.92	68.98
llama-3b	disambiguation_qa	10	67.94	89.74	64.34
llama-3b	disambiguation_qa	11	87.87	79.61	77.29
llama-3b	disambiguation_qa	12	77.79	79.46	81.45
llama-3b	disambiguation_qa	13	89.99	85.49	73.14
llama-3b	disambiguation_qa	14	78.28	84.56	73.79
llama-3b	disambiguation_qa	15	72.76	66.89	77.42
llama-3b	disambiguation_qa	16	72.12	88.94	73.08
llama-3b	disambiguation_qa	17	84.63	81.04	76.64
llama-3b	disambiguation_qa	18	73.62	75.94	70.21
llama-3b	disambiguation_qa	19	78.99	83.49	63.5
llama-3b	disambiguation_qa	20	74.98	79.78	70.69
llama-3b	disambiguation_qa	21	86.51	89.74	89.6
llama-3b	disambiguation_qa	22	89.54	64.08	81.57
llama-3b	disambiguation_qa	23	86.72	67.6	65.96
llama-3b	disambiguation_qa	24	74.71	66.23	86.79
llama-3b	disambiguation_qa	25	75.58	84.7	72.59
llama-3b	disambiguation_qa	26	72.41	74.81	65.01
llama-3b	disambiguation_qa	27	85.9	87.54	84.76
llama-3b	disambiguation_qa	28	77.1	82.65	78.9
llama-3b	disambiguation_qa	29	83.61	71.82	66.76
llama-3b	disambiguation_qa	30	88.79	86.98	83.17
llama-3b	disambiguation_qa	31	82.64	81.88	72.74
llama-3b	disambiguation_qa	32	79.4	82.66	88.45
llama-3b	disambiguation_qa	33	72.73	72.22	73.93
llama-3b	disambiguation_qa	34	79.52	72.37	87.07
llama-3b	disambiguation_qa	35	86.65	67.06	75.57
llama-3b	disambiguation_qa	36	66.79	75.15	87.24
llama-3b	disambiguation_qa	37	86.56	67.13	63.96
llama-3b	disambiguation_qa	38	73.83	88.9	79.07
llama-3b	disambiguation_qa	39	70.68	72.96	62.16
llama-3b	disambiguation_qa	40	80.98	83.05	61.9
llama-3b	disambiguation_qa	41	76.8	70.3	81.94
llama-3b	disambiguation_qa	42	67.86	87.71	63.37
llama-3b	disambiguation_qa	43	73.09	87.95	74.55
llama-3b	disambiguation_qa	44	83.4	66	60.22
llama-3b	disambiguation_qa	45	70.27	63.32	62.24
llama-3b	disambiguation_qa	46	75.28	82.3	70.44
llama-3b	disambiguation_qa	47	65.29	85.55	79.04
llama-3b	disambiguation_qa	48	84.85	76.87	85.26
llama-3b	disambiguation_qa	49	72.99	80.33	70.64
llama-3b	disambiguation_qa	50	73.98	71.42	82.32
llama-3b	disambiguation_qa	51	87.92	86.31	88.6
llama-3b	disambiguation_qa	52	73.54	68.32	85.76
llama-3b	disambiguation_qa	53	68.65	63.81	65.26
llama-3b	disambiguation_qa	54	72.51	68.11	85.09
llama-3b	disambiguation_qa	55	74.49	73.84	64.39
llama-3b	disambiguation_qa	56	85.02	65.34	87.34
llama-3b	disambiguation_qa	57	78.84	80.86	85.07
llama-3b	disambiguation_qa	58	82.99	60.7	78.04
llama-3b	disambiguation_qa	59	74.84	81.14	77.92
llama-3b	disambiguation_qa	60	86.35	65.59	88.67
llama-3b	disambiguation_qa	61	88.75	74.56	76.6
llama-3b	disambiguation_qa	62	87.07	81.72	81.42
llama-3b	disambiguation_qa	63	66.6	70.24	68.56
llama-3b	disambiguation_qa	64	75.37	61.81	78.67
llama-3b	disambiguation_qa	65	70.83	80.81	88.04
llama-3b	disambiguation_qa	66	86.16	60.51	83.16
llama-3b	disambiguation_qa	67	74.04	80.93	65.74
llama-3b	disambiguation_qa	68	75.53	88.65	87.63
llama-3b	disambiguation_qa	69	82.41	82.38	72.67
llama-3b	disambiguation_qa	70	77.18	73.37	80.73
llama-3b	disambiguation_qa	71	74.88	86.25	63.54
llama-3b	disambiguation_qa	72	76.78	70.24	81.96
llama-3b	disambiguation_qa	73	77.06	79.26	77.68
llama-3b	disambiguation_qa	74	67.01	70.38	87.06
llama-3b	disambiguation_qa	75	65.2	70.38	73.97
llama-3b	disambiguation_qa	76	71.97	61.76	68.54
llama-3b	disambiguation_qa	77	78.37	74.6	61.56
llama-3b	disambiguation_qa	78	89.07	79.39	83.83
llama-3b	disambiguation_qa	79	79.48	62.1	74.7
llama-3b	disambiguation_qa	80	67.24	85.65	87.38
llama-3b	disambiguation_qa	81	67.35	67.5	89.93
llama-3b	disambiguation_qa	82	72.28	83.4	86.48
llama-3b	disambiguation_qa	83	83.47	73.05	74.76
llama-3b	disambiguation_qa	84	79.84	77.37	82.65
llama-3b	disambiguation_qa	85	74.81	70.84	76.38
llama-3b	disambiguation_qa	86	71.04	83.19	67.71
llama-3b	disambiguation_qa	87	77.63	69.96	72.61
llama-3b	disambiguation_qa	88	79.38	79.02	83.16
llama-3b	disambiguation_qa	89	72.68	72.11	89.96
llama-3b	disambiguation_qa	90	83.54	69.11	68.39
llama-3b	disambiguation_qa	91	82.66	69.78	60.74
llama-3b	disambiguation_qa	92	65.64	65.45	73.26
llama-3b	disambiguation_qa	93	66.08	63.56	69.77
llama-3b	disambiguation_qa	94	78.25	67.2	79.54
llama-3b	disambiguation_qa	95	79.03	67.31	66.21
llama-3b	disambiguation_qa	96	68.61	66.74	74.48
llama-3b	disambiguation_qa	97	88.58	79.21	61.7
llama-3b	disambiguation_qa	98	75.76	65.27	72.49
llama-3b	disambiguation_qa	99	78.26	66.21	75.57
llama-3b	disambiguation_qa	100	86.98	85.06	79.14
llama-3b	disambiguation_qa	101	82.19	70.42	76.7
llama-3b	disambiguation_qa	102	86.83	62.33	62.89
llama-3b	disambiguation_qa	103	86.99	60.79	60.32
llama-3b	disambiguation_qa	104	77.37	86.29	86.92
llama-3b	disambiguation_qa	105	71.5	81.73	65.73
llama-3b	disambiguation_qa	106	73.59	85.22	89.35
llama-3b	disambiguation_qa	107	73.53	74.78	75.78
llama-3b	disambiguation_qa	108	77.34	72.25	83.48
llama-3b	disambiguation_qa	109	80.08	66.29	60.11
llama-3b	disambiguation_qa	110	67.61	80.73	89.91
llama-3b	disambiguation_qa	111	84.01	67.73	69.91
llama-3b	disambiguation_qa	112	83.02	79.64	86.17
llama-3b	disambiguation_qa	113	74.23	75.58	89.13
llama-3b	disambiguation_qa	114	75.7	80.08	64.14
llama-3b	disambiguation_qa	115	70.66	70.03	83.45
llama-3b	disambiguation_qa	116	78.55	67.17	87.36
llama-3b	disambiguation_qa	117	67.37	60.52	84.9
llama-3b	disambiguation_qa	118	68.27	64.35	73.33
llama-3b	disambiguation_qa	119	78.76	67.12	82.89
llama-3b	disambiguation_qa	120	73.65	76.86	83.62
llama-3b	disambiguation_qa	121	85.56	66.64	86.49
llama-3b	disambiguation_qa	122	84.51	78.38	77.19
llama-3b	disambiguation_qa	123	76.49	69.05	60.42
llama-3b	disambiguation_qa	124	89.56	61.75	89.17
llama-3b	disambiguation_qa	125	88.31	65.9	89.12
llama-3b	disambiguation_qa	126	79.68	84.07	66.66
llama-3b	disambiguation_qa	127	71.86	77.7	89.86
llama-3b	disambiguation_qa	128	74.73	65.3	72.83
llama-3b	disambiguation_qa	129	65.91	67.7	77.19
llama-3b	disambiguation_qa	130	72.05	81.04	80.67
llama-3b	disambiguation_qa	131	74.95	75.73	75.66
llama-3b	disambiguation_qa	132	81.8	61.4	76.64
llama-3b	disambiguation_qa	133	82.77	63.51	72.67
llama-3b	disambiguation_qa	134	68.93	79.09	89.36
llama-3b	disambiguation_qa	135	69.11	64.62	66.45
llama-3b	disambiguation_qa	136	88.17	79.04	79.01
llama-3b	disambiguation_qa	137	78.85	83.52	78.38
llama-3b	disambiguation_qa	138	78.99	68.41	86.79
llama-3b	disambiguation_qa	139	76.78	63.97	72.46
llama-3b	disambiguation_qa	140	75.26	67.66	63.05
llama-3b	disambiguation_qa	141	88.3	83.02	64
llama-3b	disambiguation_qa	142	70.62	87.88	71.53
llama-3b	disambiguation_qa	143	65.39	70.78	88.21
llama-3b	disambiguation_qa	144	74.4	76.11	84.35
llama-3b	disambiguation_qa	145	71.78	85.03	83.3
llama-3b	disambiguation_qa	146	77.52	89.56	81.53
llama-3b	disambiguation_qa	147	72.6	89.42	63.72
llama-3b	disambiguation_qa	148	81.45	66.42	63.34
llama-3b	disambiguation_qa	149	76.94	85.72	71.73
llama-3b	disambiguation_qa	150	79.21	83.66	75.13
llama-3b	disambiguation_qa	151	70.47	71.87	82.52
llama-3b	disambiguation_qa	152	81.07	79.65	64.18
llama-3b	disambiguation_qa	153	78.71	85.31	84.83
llama-3b	disambiguation_qa	154	88.03	84.87	64.63
llama-3b	disambiguation_qa	155	68.16	78.41	71.8
llama-3b	disambiguation_qa	156	88.31	66.21	66.36
llama-3b	disambiguation_qa	157	85.52	62.33	64.86
llama-3b	disambiguation_qa	158	88.33	85.4	86.73
llama-3b	disambiguation_qa	159	87.21	80.44	64.22
llama-3b	disambiguation_qa	160	68.69	63.73	71.97
llama-3b	disambiguation_qa	161	78.58	78.73	78.43
llama-3b	disambiguation_qa	162	83.49	66.58	74.19
llama-3b	disambiguation_qa	163	70.52	72.22	68.4
llama-3b	disambiguation_qa	164	68.96	68.66	76.12
llama-3b	disambiguation_qa	165	77.85	81.33	81.08
llama-3b	disambiguation_qa	166	72.9	89.83	61.83
llama-3b	disambiguation_qa	167	71.77	63.33	83.85
llama-3b	disambiguation_qa	168	73.22	73.02	89.97
llama-3b	disambiguation_qa	169	69.9	83.85	80.57
llama-3b	disambiguation_qa	170	75.79	85.41	89.71
llama-3b	disambiguation_qa	171	78.22	76.42	66.38
llama-3b	disambiguation_qa	172	82.68	86.33	78.09
llama-3b	disambiguation_qa	173	74.46	79.36	86.98
llama-3b	disambiguation_qa	174	88.87	64.19	74.08
llama-3b	disambiguation_qa	175	69.36	80.44	78.48
llama-3b	disambiguation_qa	176	69.76	86.99	86.6
llama-3b	disambiguation_qa	177	75.69	60.4	88.43
llama-3b	disambiguation_qa	178	88.57	74.09	79.5
llama-3b	disambiguation_qa	179	69.79	65.85	67.45
llama-3b	disambiguation_qa	180	73.71	70.1	79.67
llama-3b	disambiguation_qa	181	80.03	76.96	76.99
llama-3b	disambiguation_qa	182	88.7	61.87	64.17
llama-3b	disambiguation_qa	183	70.25	63	84.7
llama-3b	disambiguation_qa	184	72.94	80.09	69.23
llama-3b	disambiguation_qa	185	65.1	89.77	73.77
llama-3b	disambiguation_qa	186	81.28	80.81	81.52
llama-3b	disambiguation_qa	187	81.18	74.35	77.25
llama-3b	disambiguation_qa	188	88.81	68.91	81.92
llama-3b	disambiguation_qa	189	89.9	71.92	86.75
llama-3b	disambiguation_qa	190	88.83	87.74	62.18
llama-3b	disambiguation_qa	191	84.26	67.13	74.81
llama-3b	disambiguation_qa	192	72.47	66.97	85.35
llama-3b	disambiguation_qa	193	71.2	88.02	73.6
llama-3b	disambiguation_qa	194	74.58	66.04	78.19
llama-3b	disambiguation_qa	195	82.22	73.83	87.23
llama-3b	disambiguation_qa	196	83.51	79.44	63.25
llama-3b	disambiguation_qa	197	81.69	77.07	87.03
llama-3b	disambiguation_qa	198	66.61	88.37	88.92
llama-3b	disambiguation_qa	199	71.31	70.66	80.05
llama-3b	disambiguation_qa	200	89.25	65.38	84.13
llama-3b	disambiguation_qa	201	65.73	79.85	66.43
llama-3b	disambiguation_qa	202	79.9	69.32	61.9
llama-3b	disambiguation_qa	203	82.33	88.15	77.13
llama-3b	disambiguation_qa	204	66.25	75.18	72.72
llama-3b	disambiguation_qa	205	75	81.77	67
llama-3b	disambiguation_qa	206	72.05	61.17	87.99
llama-3b	disambiguation_qa	207	82.7	82.67	76.43
llama-3b	disambiguation_qa	208	80.78	66.89	81.94
llama-3b	disambiguation_qa	209	88.72	83.36	64.16
llama-3b	disambiguation_qa	210	66.76	61.03	82.12
llama-3b	disambiguation_qa	211	89.01	82.5	72.38
llama-3b	disambiguation_qa	212	69.67	77.78	82
llama-3b	disambiguation_qa	213	68.25	82.53	88.81
llama-3b	disambiguation_qa	214	89.4	60.88	86.99
llama-3b	disambiguation_qa	215	68.22	85.35	68.15
llama-3b	disambiguation_qa	216	72.35	77.87	71.05
llama-3b	disambiguation_qa	217	77.83	61.3	87.66
llama-3b	disambiguation_qa	218	85.61	70.45	85.83
llama-3b	disambiguation_qa	219	68.36	88.75	88.01
llama-3b	disambiguation_qa	220	68.68	85.15	76.02
llama-3b	disambiguation_qa	221	76.46	67.37	85.17
llama-3b	disambiguation_qa	222	71.17	74.61	78.63
llama-3b	disambiguation_qa	223	84.19	81.53	76.43
llama-3b	disambiguation_qa	224	68.56	76.68	67.83
llama-3b	disambiguation_qa	225	67.56	87.71	60.49
llama-3b	disambiguation_qa	226	79.29	71.76	70.18
llama-3b	disambiguation_qa	227	68	62.73	73.21
llama-3b	disambiguation_qa	228	84.17	84.02	86.44
llama-3b	disambiguation_qa	229	69.38	83.23	65.83
llama-3b	disambiguation_qa	230	68.18	83.27	87.94
llama-3b	disambiguation_qa	231	65.43	76.26	70.85
llama-3b	disambiguation_qa	232	69.97	63.62	61.8
llama-3b	disambiguation_qa	233	67.5	65.61	72.98
llama-3b	disambiguation_qa	234	75.52	61.71	72.8
llama-3b	disambiguation_qa	235	69.07	85.56	83.52
llama-3b	disambiguation_qa	236	67.25	71.36	87.05
llama-3b	disambiguation_qa	237	85	83.11	84.45
llama-3b	disambiguation_qa	238	79.66	78.94	79.77
llama-3b	disambiguation_qa	239	67.46	72.98	78.94
llama-3b	disambiguation_qa	240	73.35	75.77	71.58
llama-3b	disambiguation_qa	241	69.64	78.06	76.49
llama-3b	disambiguation_qa	242	82.94	76.69	60.04
llama-3b	disambiguation_qa	243	86.08	83.79	63.93
llama-3b	disambiguation_qa	244	68.46	69.05	73.56
llama-3b	disambiguation_qa	245	67.5	88.44	88.68
llama-3b	disambiguation_qa	246	78.88	81.28	85.64
llama-3b	disambiguation_qa	247	75.94	84.95	76.17
llama-3b	disambiguation_qa	248	69.63	85.69	72.84
llama-3b	disambiguation_qa	249	88.71	69.61	69.69
llama-3b	dyck_languages	0	79.61	74.11	72.37
llama-3b	dyck_languages	1	87.95	64.76	89.73
llama-3b	dyck_languages	2	66.54	78.81	61
llama-3b	dyck_languages	3	80.52	84.74	66.78
llama-3b	dyck_languages	4	88.9	68.23	64.16
llama-3b	dyck_languages	5	67.45	61.51	61.46
llama-3b	dyck_languages	6	72.82	71.56	66.02
llama-3b	dyck_languages	7	78.65	70.64	87.03
llama-3b	dyck_languages	8	87.51	66.98	81.54
llama-3b	dyck_languages	9	80.47	68.73	85.38
llama-3b	dyck_languages	10	67.98	62.16	80.19
llama-3b	dyck_languages	11	65.43	78.22	66.3
llama-3b	dyck_languages	12	89.08	81.41	69.93
llama-3b	dyck_languages	13	86.25	76.01	79.36
llama-3b	dyck_languages	14	81.88	87.1	69.12
llama-3b	dyck_languages	15	89.85	81.21	76.68
llama-3b	dyck_languages	16	83.49	61.4	89.88
llama-3b	dyck_languages	17	87.38	78.56	87.18
llama-3b	dyck_languages	18	79.16	80.79	68.77
llama-3b	dyck_languages	19	76.91	73.82	83.38
llama-3b	dyck_languages	20	65.44	69.89	88.17
llama-3b	dyck_languages	21	84.87	78.51	83.49
llama-3b	dyck_languages	22	70.58	77.74	89.12
llama-3b	dyck_languages	23	77.47	86.5	73.25
llama-3b	dyck_languages	24	87.54	84.8	78.8
llama-3b	dyck_languages	25	77.02	81.46	83.59
llama-3b	dyck_languages	26	84.3	86.78	70.28
llama-3b	dyck_languages	27	81.65	64.66	60.58
llama-3b	dyck_languages	28	69.62	72.16	82.18
llama-3b	dyck_languages	29	71.94	75.04	69.6
llama-3b	dyck_languages	30	89.01	76.01	66.99
llama-3b	dyck_languages	31	66.63	86.43	68.16
llama-3b	dyck_languages	32	83.92	65.06	78.01
llama-3b	dyck_languages	33	81.6	87.2	71.67
llama-3b	dyck_languages	34	65.19	86.35	85.31
llama-3b	dyck_languages	35	72.78	71.65	69.18
llama-3b	dyck_languages	36	78.17	60.94	83.26
llama-3b	dyck_languages	37	89.44	76.16	66.73
llama-3b	dyck_languages	38	71.18	81.58	62.45
llama-3b	dyck_languages	39	81.7	63.22	85.55
llama-3b	dyck_languages	40	75.58	87.93	84.64
llama-3b	dyck_languages	41	75.88	82.66	68.01
llama-3b	dyck_languages	42	80.67	60.33	67.9
llama-3b	dyck_languages	43	88.79	89.72	75.28
llama-3b	dyck_languages	44	82.06	84.82	83.59
llama-3b	dyck_languages	45	66.09	66.04	64.09
llama-3b	dyck_languages	46	72.45	61.98	67.16
llama-3b	dyck_languages	47	67.97	68.92	62.39
llama-3b	dyck_languages	48	87.78	74.5	84.28
llama-3b	dyck_languages	49	65.25	70.94	75.45
llama-3b	dyck_languages	50	70.51	87.24	75.45
llama-3b	dyck_languages	51	81.41	68.15	83.13
llama-3b	dyck_languages	52	68.93	79.53	81
llama-3b	dyck_languages	53	66.28	64.54	82.34
llama-3b	dyck_languages	54	70.86	71.58	61.5
llama-3b	dyck_languages	55	78.94	83.6	61.89
llama-3b	dyck_languages	56	81.97	61.81	80.01
llama-3b	dyck_languages	57	76.02	86.19	68.72
llama-3b	dyck_languages	58	71.99	83.93	76.86
llama-3b	dyck_languages	59	77.1	79.99	64.64
llama-3b	dyck_languages	60	65.7	74.93	80.19
llama-3b	dyck_languages	61	65.94	76.24	65.58
llama-3b	dyck_languages	62	86.84	63.05	63.09
llama-3b	dyck_languages	63	79.39	69.41	71.43
llama-3b	dyck_languages	64	72.11	79.2	88.26
llama-3b	dyck_languages	65	72.34	68.3	69.2
llama-3b	dyck_languages	66	77.14	60.34	84.13
llama-3b	dyck_languages	67	72.69	80.55	61.89
llama-3b	dyck_languages	68	74.67	64.73	72.05
llama-3b	dyck_languages	69	75.39	66.61	83.3
llama-3b	dyck_languages	70	66.32	66.46	62.08
llama-3b	dyck_languages	71	82.38	66.52	82.76
llama-3b	dyck_languages	72	75.08	75.84	62.11
llama-3b	dyck_languages	73	79.23	70.69	78.08
llama-3b	dyck_languages	74	78.98	83.15	67.56
llama-3b	dyck_languages	75	75.74	70.7	67.2
llama-3b	dyck_languages	76	76.34	61.94	73.64
llama-3b	dyck_languages	77	88.8	87.78	82.46
llama-3b	dyck_languages	78	70.21	72.62	80.38
llama-3b	dyck_languages	79	82.11	67.89	74.35
llama-3b	dyck_languages	80	70.25	77.36	67.37
llama-3b	dyck_languages	81	77.47	85.2	79.78
llama-3b	dyck_languages	82	66.18	89.87	79
llama-3b	dyck_languages	83	70.85	75.35	88.58
llama-3b	dyck_languages	84	85.23	64.04	85.28
llama-3b	dyck_languages	85	89.22	65.02	69.48
llama-3b	dyck_languages	86	68.01	72.68	85.1
llama-3b	dyck_languages	87	65.8	79.3	68.46
llama-3b	dyck_languages	88	75.66	67.93	88.51
llama-3b	dyck_languages	89	78.81	76.97	74.78
llama-3b	dyck_languages	90	85.32	87.03	65.96
llama-3b	dyck_languages	91	72.54	60.04	89.26
llama-3b	dyck_languages	92	67.17	78.29	73.89
llama-3b	dyck_languages	93	72.21	85.14	70.34
llama-3b	dyck_languages	94	70.48	89.32	67.28
llama-3b	dyck_languages	95	71.38	78.16	81.21
llama-3b	dyck_languages	96	71.25	88.42	74.59
llama-3b	dyck_languages	97	83.96	80.93	77.19
llama-3b	dyck_languages	98	65.2	77.95	65.06
llama-3b	dyck_languages	99	78.74	75.8	68.82
llama-3b	dyck_languages	100	66.51	72.29	66.27
llama-3b	dyck_languages	101	84.08	60.04	89.03
llama-3b	dyck_languages	102	82.61	77.34	75.37
llama-3b	dyck_languages	103	70.64	63.58	65.98
llama-3b	dyck_languages	104	78.23	72.15	66.39
llama-3b	dyck_languages	105	77.29	68.13	67.68
llama-3b	dyck_languages	106	75.36	73.14	66.6
llama-3b	dyck_languages	107	86.78	64.76	76.22
llama-3b	dyck_languages	108	69.34	81.2	69.6
llama-3b	dyck_languages	109	72.25	80.83	64.83
llama-3b	dyck_languages	110	83.81	70.37	72.04
llama-3b	dyck_languages	111	88.4	64.11	77.03
llama-3b	dyck_languages	112	84.36	68.11	60.27
llama-3b	dyck_languages	113	74.74	69.08	75.21
llama-3b	dyck_languages	114	81.21	76.2	76.55
llama-3b	dyck_languages	115	79.66	63.32	78.85
llama-3b	dyck_languages	116	66.8	66.12	60.55
llama-3b	dyck_languages	117	79.35	73.96	68.15
llama-3b	dyck_languages	118	81.1	60.17	64.99
llama-3b	dyck_languages	119	74.26	79.75	80.24
llama-3b	dyck_languages	120	76.09	79.15	62.64
llama-3b	dyck_languages	121	89.02	84.21	66.93
llama-3b	dyck_languages	122	80.84	71.85	88.43
llama-3b	dyck_languages	123	78.17	78.27	71.64
llama-3b	dyck_languages	124	80.06	87.72	84.77
llama-3b	dyck_languages	125	83.17	61.39	74.8
llama-3b	dyck_languages	126	79.74	68.07	86.5
llama-3b	dyck_languages	127	88.64	82.69	76.78
llama-3b	dyck_languages	128	75.23	70.51	77.46
llama-3b	dyck_languages	129	70.75	60.83	72.05
llama-3b	dyck_languages	130	72.33	61.12	69.42
llama-3b	dyck_languages	131	86.93	78.56	69.49
llama-3b	dyck_languages	132	86.06	67.73	82.42
llama-3b	dyck_languages	133	67.88	82.18	85.84
llama-3b	dyck_languages	134	80.93	64.93	74.31
llama-3b	dyck_languages	135	74.81	67.18	73.89
llama-3b	dyck_languages	136	66.46	61.87	68.28
llama-3b	dyck_languages	137	74.88	73.83	79.96
llama-3b	dyck_languages	138	68.53	69.7	78.31
llama-3b	dyck_languages	139	79.05	79.47	83.01
llama-3b	dyck_languages	140	67.27	75.05	71.7
llama-3b	dyck_languages	141	89.84	79.06	81.72
llama-3b	dyck_languages	142	82.72	69.84	86.83
llama-3b	dyck_languages	143	83	89.27	67.25
llama-3b	dyck_languages	144	89.69	89.2	63.56
llama-3b	dyck_languages	145	80.63	74.17	65.89
llama-3b	dyck_languages	146	71.4	81.95	70.61
llama-3b	dyck_languages	147	75.54	83.5	76.67
llama-3b	dyck_languages	148	77.96	64.78	74.66
llama-3b	dyck_languages	149	72.02	74.19	66.76
llama-3b	dyck_languages	150	85.9	88.13	73.44
llama-3b	dyck_languages	151	86.04	73.31	72.49
llama-3b	dyck_languages	152	86.47	79.04	87.68
llama-3b	dyck_languages	153	77.74	61.87	85.9
llama-3b	dyck_languages	154	78.88	66.66	68.01
llama-3b	dyck_languages	155	73.3	67.27	78.58
llama-3b	dyck_languages	156	79.26	63.84	67.91
llama-3b	dyck_languages	157	89.37	78.88	74.91
llama-3b	dyck_languages	158	77.65	72.16	89.07
llama-3b	dyck_languages	159	68.32	80.55	89.45
llama-3b	dyck_languages	160	67.88	73.87	81.94
llama-3b	dyck_languages	161	80.24	63.66	80.41
llama-3b	dyck_languages	162	82.79	62.12	62.77
llama-3b	dyck_languages	163	69.73	75.4	84.52
llama-3b	dyck_languages	164	82.17	77.38	80.45
llama-3b	dyck_languages	165	84.74	68.73	86.54
llama-3b	dyck_languages	166	69.35	78.93	71.11
llama-3b	dyck_languages	167	82.19	86.16	82.13
llama-3b	dyck_languages	168	84.08	88.61	61.72
llama-3b	dyck_languages	169	82.02	66.65	81.98
llama-3b	dyck_languages	170	85.8	61.23	60.58
llama-3b	dyck_languages	171	82.82	69.17	87.96
llama-3b	dyck_languages	172	83.31	77.95	84.14
llama-3b	dyck_languages	173	79.04	79.12	89.48
llama-3b	dyck_languages	174	76.14	89.33	78.16
llama-3b	dyck_languages	175	73.65	64.13	86.55
llama-3b	dyck_languages	176	68.06	83.32	61.3
llama-3b	dyck_languages	177	86.01	75.66	68.79
llama-3b	dyck_languages	178	73	73.54	88.65
llama-3b	dyck_languages	179	81.62	78.72	86.13
llama-3b	dyck_languages	180	85.7	83.52	62.37
llama-3b	dyck_languages	181	88.13	62.03	83.12
llama-3b	dyck_languages	182	78.63	79.63	65.25
llama-3b	dyck_languages	183	78.51	78.68	65.32
llama-3b	dyck_languages	184	85.79	70.27	73.63
llama-3b	dyck_languages	185	82.46	73.66	75.66
llama-3b	dyck_languages	186	85.19	75.87	70.14
llama-3b	dyck_languages	187	75.58	70.66	71.39
llama-3b	dyck_languages	188	65.59	78.12	69.8
llama-3b	dyck_languages	189	66.32	82.32	82.92
llama-3b	dyck_languages	190	87.65	85.41	83.74
llama-3b	dyck_languages	191	85.58	64.06	66.5
llama-3b	dyck_languages	192	79.38	85.21	60.56
llama-3b	dyck_languages	193	81.48	67	77.31
llama-3b	dyck_languages	194	65.77	80.63	64
llama-3b	dyck_languages	195	69.38	66.32	89.08
llama-3b	dyck_languages	196	71.81	68.75	69.55
llama-3b	dyck_languages	197	70.44	83.02	65.14
llama-3b	dyck_languages	198	73.96	74.04	82.12
llama-3b	dyck_languages	199	73.82	63.23	73.35
llama-3b	dyck_languages	200	72.16	82.18	69.42
llama-3b	dyck_languages	201	66.27	76.87	85.55
llama-3b	dyck_languages	202	77.67	72.59	60.13
llama-3b	dyck_languages	203	88.72	83.11	83.4
llama-3b	dyck_languages	204	71.79	63.58	63.05
llama-3b	dyck_languages	205	84.41	81.67	71.25
llama-3b	dyck_languages	206	76.55	76.4	81.44
llama-3b	dyck_languages	207	74.18	79.43	86.01
llama-3b	dyck_languages	208	70.22	78.56	86.09
llama-3b	dyck_languages	209	84.96	69.8	66.58
llama-3b	dyck_languages	210	80.09	61.47	61.48
llama-3b	dyck_languages	211	73.45	69.05	82.1
llama-3b	dyck_languages	212	66.16	81.54	84.65
llama-3b	dyck_languages	213	69.82	77.64	87.33
llama-3b	dyck_languages	214	66.47	89.63	78.56
llama-3b	dyck_languages	215	78.59	85.33	76.56
llama-3b	dyck_languages	216	78.98	65.04	86.33
llama-3b	dyck_languages	217	79.01	63.67	68.81
llama-3b	dyck_languages	218	69.53	68.13	66.03
llama-3b	dyck_languages	219	86.66	78.12	75.94
llama-3b	dyck_languages	220	66.75	86.17	63.38
llama-3b	dyck_languages	221	78.07	67.31	74.98
llama-3b	dyck_languages	222	67.62	89.48	87.43
llama-3b	dyck_languages	223	68.2	63.77	87.65
llama-3b	dyck_languages	224	89.12	79.54	73.1
llama-3b	dyck_languages	225	88.37	75.74	61.77
llama-3b	dyck_languages	226	65.53	81.96	71.37
llama-3b	dyck_languages	227	79.04	80.08	69.25
llama-3b	dyck_languages	228	80.33	89.87	71.48
llama-3b	dyck_languages	229	73.71	65.58	60.19
llama-3b	dyck_languages	230	66.95	70.59	64.48
llama-3b	dyck_languages	231	79.13	73.67	66.13
llama-3b	dyck_languages	232	67.95	79.77	68.78
llama-3b	dyck_languages	233	74.47	87.1	66.36
llama-3b	dyck_languages	234	86.85	77.51	60.85
llama-3b	dyck_languages	235	80.7	82.54	66.73
llama-3b	dyck_languages	236	68.78	71.58	78.79
llama-3b	dyck_languages	237	77.23	72.71	83.1
llama-3b	dyck_languages	238	77.52	85.14	66.4
llama-3b	dyck_languages	239	66.11	60.44	66.04
llama-3b	dyck_languages	240	75.83	71.02	81.02
llama-3b	dyck_languages	241	75.19	79.09	61.16
llama-3b	dyck_languages	242	72.32	77.22	71.79
llama-3b	dyck_languages	243	71.93	83.87	84.56
llama-3b	dyck_languages	244	65.23	76.57	76.37
llama-3b	dyck_languages	245	74.29	71.27	80.26
llama-3b	dyck_languages	246	70.54	66.42	68.66
llama-3b	dyck_languages	247	79.31	89.78	76.14
llama-3b	dyck_languages	248	66.97	77.11	70.58
llama-3b	dyck_languages	249	88.3	66.34	86.83
llama-3b	formal_fallacies	0	78.38	88.71	60.87
llama-3b	formal_fallacies	1	77.82	78.7	66.02
llama-3b	formal_fallacies	2	75.74	69.76	69.02
llama-3b	formal_fallacies	3	86.05	88.47	86.51
llama-3b	formal_fallacies	4	84.39	74.79	60.98
llama-3b	formal_fallacies	5	87.34	80.37	86.15
llama-3b	formal_fallacies	6	79.03	67.9	64.42
llama-3b	formal_fallacies	7	88.15	88.38	81.05
llama-3b	formal_fallacies	8	65.09	78.37	80.18
llama-3b	formal_fallacies	9	89.33	70.37	63.26
llama-3b	formal_fallacies	10	68.57	78.84	81.39
llama-3b	formal_fallacies	11	66.39	75.33	71.13
llama-3b	formal_fallacies	12	74.34	86.84	85.42
llama-3b	formal_fallacies	13	75.38	65.62	81.01
llama-3b	formal_fallacies	14	75.76	72	64.51
llama-3b	formal_fallacies	15	81.49	69.45	89.13
llama-3b	formal_fallacies	16	74.66	73.06	77.24
llama-3b	formal_fallacies	17	72.52	71.26	71.05
llama-3b	formal_fallacies	18	71.1	73.98	63.75
llama-3b	formal_fallacies	19	84.9	81.01	89.96
llama-3b	formal_fallacies	20	85.14	64.05	68.2
llama-3b	formal_fallacies	21	88.99	84.55	69.1
llama-3b	formal_fallacies	22	68.03	77.19	89.73
llama-3b	formal_fallacies	23	72.56	63.59	65.73
llama-3b	formal_fallacies	24	76.2	62.3	77.57
llama-3b	formal_fallacies	25	81.22	88.82	61.69
llama-3b	formal_fallacies	26	74.3	88.38	72.93
llama-3b	formal_fallacies	27	81.03	86.19	85.53
llama-3b	formal_fallacies	28	77.93	81.63	63.94
llama-3b	formal_fallacies	29	70.74	77.72	62.71
llama-3b	formal_fallacies	30	85.44	84.25	66.25
llama-3b	formal_fallacies	31	73.46	80.42	74.92
llama-3b	formal_fallacies	32	83.11	73.24	83.69
llama-3b	formal_fallacies	33	76.17	83.74	88.67
llama-3b	formal_fallacies	34	69.71	62.24	86.53
llama-3b	formal_fallacies	35	70.34	62.97	68.34
llama-3b	formal_fallacies	36	79.7	85.86	76.21
llama-3b	formal_fallacies	37	77.59	80.84	86.15
llama-3b	formal_fallacies	38	71.05	72.17	79.34
llama-3b	formal_fallacies	39	80.92	65.59	76.82
llama-3b	formal_fallacies	40	74.59	60.3	75.97
llama-3b	formal_fallacies	41	73.02	87.53	85.44
llama-3b	formal_fallacies	42	85.24	61.86	65.42
llama-3b	formal_fallacies	43	84.24	88.89	74.99
llama-3b	formal_fallacies	44	73.09	74.19	62.99
llama-3b	formal_fallacies	45	76.47	77.48	71.21
llama-3b	formal_fallacies	46	80.2	85.88	78.21
llama-3b	formal_fallacies	47	68.31	63.08	63.47
llama-3b	formal_fallacies	48	65.26	88.21	80.96
llama-3b	formal_fallacies	49	73.33	80.74	66.73
llama-3b	formal_fallacies	50	74.76	87.62	72.39
llama-3b	formal_fallacies	51	83.77	77.42	72.51
llama-3b	formal_fallacies	52	79.37	85.77	80.98
llama-3b	formal_fallacies	53	69.99	75.92	89.17
llama-3b	formal_fallacies	54	69.78	88.6	60.85
llama-3b	formal_fallacies	55	74.81	88.43	68.05
llama-3b	formal_fallacies	56	67.68	78.3	74.26
llama-3b	formal_fallacies	57	69.72	71.18	72.29
llama-3b	formal_fallacies	58	65.01	83.65	84.14
llama-3b	formal_fallacies	59	79.19	60.41	74.44
llama-3b	formal_fallacies	60	68.36	79.17	75.32
llama-3b	formal_fallacies	61	71.52	67.24	64.14
llama-3b	formal_fallacies	62	74.32	79.01	65.52
llama-3b	formal_fallacies	63	89.4	86.41	75.46
llama-3b	formal_fallacies	64	77.16	67.72	86.21
llama-3b	formal_fallacies	65	69.91	72.53	76.88
llama-3b	formal_fallacies	66	74.78	87.86	72.27
llama-3b	formal_fallacies	67	79.67	76.94	72.92
llama-3b	formal_fallacies	68	86.58	86.45	69.79
llama-3b	formal_fallacies	69	89.39	65.13	67.24
llama-3b	formal_fallacies	70	83.55	76.54	61.8
llama-3b	formal_fallacies	71	89.86	76.09	66.04
llama-3b	formal_fallacies	72	86.04	79.82	70.23
llama-3b	formal_fallacies	73	81.65	76.78	85.16
llama-3b	formal_fallacies	74	89.91	76.03	74.49
llama-3b	formal_fallacies	75	70.64	81.57	71.3
llama-3b	formal_fallacies	76	67.74	75.99	86.39
llama-3b	formal_fallacies	77	84.99	76.87	89.82
llama-3b	formal_fallacies	78	82.72	66.82	81.21
llama-3b	formal_fallacies	79	78.74	76.71	80.96
llama-3b	formal_fallacies	80	71.39	79.12	81.01
llama-3b	formal_fallacies	81	70.22	64.01	88.82
llama-3b	formal_fallacies	82	85.3	84.53	65.23
llama-3b	formal_fallacies	83	87.79	82.34	67.91
llama-3b	formal_fallacies	84	79.48	64.4	84.27
llama-3b	formal_fallacies	85	65.22	62.22	88.5
llama-3b	formal_fallacies	86	75.58	70.27	65.45
llama-3b	formal_fallacies	87	65.16	85.96	85.81
llama-3b	formal_fallacies	88	75.02	84.4	65.06
llama-3b	formal_fallacies	89	80.86	79.39	61.18
llama-3b	formal_fallacies	90	81.64	75.81	68.02
llama-3b	formal_fallacies	91	83.42	81.75	89.06
llama-3b	formal_fallacies	92	85.3	82.01	74.89
llama-3b	formal_fallacies	93	85.19	70.69	85.54
llama-3b	formal_fallacies	94	69.17	68.89	65.49
llama-3b	formal_fallacies	95	89.58	75.67	87.8
llama-3b	formal_fallacies	96	87.13	87.29	82
llama-3b	formal_fallacies	97	83.8	85.48	72.34
llama-3b	formal_fallacies	98	75.34	79.32	88.09
llama-3b	formal_fallacies	99	72.01	73.44	84.65
llama-3b	formal_fallacies	100	83.94	66.26	61.2
llama-3b	formal_fallacies	101	85.59	86.47	88.88
llama-3b	formal_fallacies	102	78.48	76.92	87.38
llama-3b	formal_fallacies	103	82.67	66.04	71.19
llama-3b	formal_fallacies	104	74.47	70.04	70.14
llama-3b	formal_fallacies	105	88.21	68.1	69.3
llama-3b	formal_fallacies	106	78.94	70.5	64.89
llama-3b	formal_fallacies	107	89.12	77.73	81.45
llama-3b	formal_fallacies	108	70.34	64.61	60.89
llama-3b	formal_fallacies	109	81.19	68.52	68.17
llama-3b	formal_fallacies	110	87.42	61.92	77.86
llama-3b	formal_fallacies	111	72.29	76.97	86.85
llama-3b	formal_fallacies	112	69.45	67.27	70.08
llama-3b	formal_fallacies	113	71.31	75.61	70.88
llama-3b	formal_fallacies	114	73.22	64.88	64.29
llama-3b	formal_fallacies	115	72.75	63.62	70.31
llama-3b	formal_fallacies	116	86.88	71.64	77.07
llama-3b	formal_fallacies	117	81.31	73.69	66.7
llama-3b	formal_fallacies	118	81.53	60.92	84.34
llama-3b	formal_fallacies	119	79.37	64.35	73.96
llama-3b	formal_fallacies	120	72.24	63.18	82.62
llama-3b	formal_fallacies	121	67.5	69.96	80.98
llama-3b	formal_fallacies	122	79.75	63.78	77.87
llama-3b	formal_fallacies	123	89.48	85.38	64.53
llama-3b	formal_fallacies	124	67.56	73.74	76.67
llama-3b	formal_fallacies	125	76.57	74.11	61.58
llama-3b	formal_fallacies	126	88.11	65.43	89.12
llama-3b	formal_fallacies	127	84.49	66.03	70.94
llama-3b	formal_fallacies	128	89.6	87.52	84.95
llama-3b	formal_fallacies	129	78.97	87.4	83.61
llama-3b	formal_fallacies	130	84.04	88.83	82.95
llama-3b	formal_fallacies	131	75.94	60.79	67.96
llama-3b	formal_fallacies	132	72.89	67.35	65.72
llama-3b	formal_fallacies	133	80.2	65.2	82.3
llama-3b	formal_fallacies	134	67.39	67.88	83.09
llama-3b	formal_fallacies	135	66.7	83.46	81.77
llama-3b	formal_fallacies	136	72.58	64.66	73.99
llama-3b	formal_fallacies	137	88.1	86.65	83.74
llama-3b	formal_fallacies	138	77.54	78.64	89.1
llama-3b	formal_fallacies	139	81.17	77.57	75.9
llama-3b	formal_fallacies	140	72.37	86.54	81.41
llama-3b	formal_fallacies	141	77.11	88.55	75.72
llama-3b	formal_fallacies	142	67.29	81.12	63.29
llama-3b	formal_fallacies	143	88.31	69.5	65.04
llama-3b	formal_fallacies	144	70.95	87.92	89.61
llama-3b	formal_fallacies	145	82.22	85.65	60.94
llama-3b	formal_fallacies	146	67.14	87.8	63.36
llama-3b	formal_fallacies	147	87.24	88.71	86.64
llama-3b	formal_fallacies	148	86.33	87.21	68.14
llama-3b	formal_fallacies	149	73.46	84.28	61.98
llama-3b	formal_fallacies	150	88.42	60.73	80.66
llama-3b	formal_fallacies	151	83.73	68.77	71.73
llama-3b	formal_fallacies	152	83.26	88.07	80.02
llama-3b	formal_fallacies	153	83.59	66.49	78.78
llama-3b	formal_fallacies	154	79.21	75.41	89.76
llama-3b	formal_fallacies	155	77.53	60.06	82.95
llama-3b	formal_fallacies	156	70	67.53	62.16
llama-3b	formal_fallacies	157	88.34	84.85	63.07
llama-3b	formal_fallacies	158	85.94	65.05	63.51
llama-3b	formal_fallacies	159	65.78	78.18	83.29
llama-3b	formal_fallacies	160	69.65	72.67	70.1
llama-3b	formal_fallacies	161	74.14	74.4	74.98
llama-3b	formal_fallacies	162	73.21	72.53	74.43
llama-3b	formal_fallacies	163	77.41	74.28	67.29
llama-3b	formal_fallacies	164	83.07	78.9	82.77
llama-3b	formal_fallacies	165	65.6	79.92	68.63
llama-3b	formal_fallacies	166	87.26	80.33	71.62
llama-3b	formal_fallacies	167	73.83	62.27	87.11
llama-3b	formal_fallacies	168	89.55	77.94	85.02
llama-3b	formal_fallacies	169	76.43	83.09	83.03
llama-3b	formal_fallacies	170	76.77	60.14	62.99
llama-3b	formal_fallacies	171	77.19	71.26	64.77
llama-3b	formal_fallacies	172	65.03	70.14	68.92
llama-3b	formal_fallacies	173	72.16	73.28	74.3
llama-3b	formal_fallacies	174	68.72	67.3	66.53
llama-3b	formal_fallacies	175	84.83	86	86.84
llama-3b	formal_fallacies	176	86.99	67.29	62.81
llama-3b	formal_fallacies	177	79.86	76.97	89.01
llama-3b	formal_fallacies	178	78.9	84.23	79.08
llama-3b	formal_fallacies	179	86.13	62.33	89.9
llama-3b	formal_fallacies	180	69.31	69.81	88.43
llama-3b	formal_fallacies	181	69.49	81.08	77.57
llama-3b	formal_fallacies	182	86.48	87.01	89.34
llama-3b	formal_fallacies	183	70.29	69.9	75.67
llama-3b	formal_fallacies	184	66.36	61.32	70.33
llama-3b	formal_fallacies	185	67.51	68.97	67.69
llama-3b	formal_fallacies	186	67.11	60.41	72.35
llama-3b	formal_fallacies	187	66.44	70.96	66.55
llama-3b	formal_fallacies	188	73.3	69	74.88
llama-3b	formal_fallacies	189	84.56	77.36	77.11
llama-3b	formal_fallacies	190	76.51	79	61.86
llama-3b	formal_fallacies	191	87.57	84.57	83.79
llama-3b	formal_fallacies	192	67.38	68.04	71.63
llama-3b	formal_fallacies	193	80.82	63.57	87.61
llama-3b	formal_fallacies	194	71.36	89.75	68.78
llama-3b	formal_fallacies	195	85.8	88.47	78.35
llama-3b	formal_fallacies	196	86.08	71.09	70.41
llama-3b	formal_fallacies	197	80.76	89.05	84.67
llama-3b	formal_fallacies	198	84.04	68.46	85.75
llama-3b	formal_fallacies	199	69.85	62.02	83.35
llama-3b	formal_fallacies	200	82.9	82.6	85.25
llama-3b	formal_fallacies	201	74.88	73.07	81.6
llama-3b	formal_fallacies	202	69.95	89.53	83.4
llama-3b	formal_fallacies	203	75.59	64.13	80.38
llama-3b	formal_fallacies	204	80.44	82.22	73.68
llama-3b	formal_fallacies	205	76.32	70.13	82.55
llama-3b	formal_fallacies	206	73.07	76.69	82.37
llama-3b	formal_fallacies	207	77.23	66.72	72.07
llama-3b	formal_fallacies	208	70.89	75.83	61.76
llama-3b	formal_fallacies	209	77.72	66.1	81.5
llama-3b	formal_fallacies	210	69.42	85.33	76.73
llama-3b	formal_fallacies	211	76.59	63.67	68.73
llama-3b	formal_fallacies	212	65.91	78.84	68.94
llama-3b	formal_fallacies	213	78.68	63.03	81.66
llama-3b	formal_fallacies	214	75.19	62.38	87.84
llama-3b	formal_fallacies	215	82.27	66.92	78.07
llama-3b	formal_fallacies	216	74.27	70.89	77.86
llama-3b	formal_fallacies	217	76.98	79.87	66.83
llama-3b	formal_fallacies	218	73.27	66.3	63.71
llama-3b	formal_fallacies	219	74.41	74.23	80.8
llama-3b	formal_fallacies	220	78.92	87.27	73.36
llama-3b	formal_fallacies	221	85.9	76.61	88.52
llama-3b	formal_fallacies	222	84.75	81.71	61.99
llama-3b	formal_fallacies	223	72.43	63.22	80.08
llama-3b	formal_fallacies	224	72.62	88.82	89.04
llama-3b	formal_fallacies	225	87.86	72.37	76.27
llama-3b	formal_fallacies	226	76.72	83.82	88.71
llama-3b	formal_fallacies	227	85.99	89.01	85.4
llama-3b	formal_fallacies	228	73.32	78.48	83.77
llama-3b	formal_fallacies	229	78.59	77.78	60.4
llama-3b	formal_fallacies	230	85.42	67.12	88.91
llama-3b	formal_fallacies	231	85.5	70.56	88.13
llama-3b	formal_fallacies	232	77.01	86.97	85.44
llama-3b	formal_fallacies	233	70.84	69.17	70.43
llama-3b	formal_fallacies	234	68.78	65.5	69.69
llama-3b	formal_fallacies	235	87.23	75.96	68.26
llama-3b	formal_fallacies	236	75.29	77.99	80.05
llama-3b	formal_fallacies	237	75.6	69.89	60.64
llama-3b	formal_fallacies	238	83.11	81.97	62.24
llama-3b	formal_fallacies	239	75	86.65	88.63
llama-3b	formal_fallacies	240	65.77	69.83	72.01
llama-3b	formal_fallacies	241	84.05	77.19	64.21
llama-3b	formal_fallacies	242	70.3	88.69	73.21
llama-3b	formal_fallacies	243	75.96	62.92	67.85
llama-3b	formal_fallacies	244	82.44	81.24	65.8
llama-3b	formal_fallacies	245	73.13	76.78	72.03
llama-3b	formal_fallacies	246	81.1	63.89	83.41
llama-3b	formal_fallacies	247	67.46	67.25	60.2
llama-3b	formal_fallacies	248	87.25	81.23	80.45
llama-3b	formal_fallacies	249	80.1	68.75	66.86
llama-3b	geometric_shapes	0	74.07	80.09	71.5
llama-3b	geometric_shapes	1	85.67	80.17	82.53
llama-3b	geometric_shapes	2	70.09	77.19	78.86
llama-3b	geometric_shapes	3	78.53	86.25	85.63
llama-3b	geometric_shapes	4	65.93	78.97	60.84
llama-3b	geometric_shapes	5	86.08	60.1	88
llama-3b	geometric_shapes	6	88.78	75.89	75.13
llama-3b	geometric_shapes	7	84.24	65.57	71.77
llama-3b	geometric_shapes	8	79.85	69.26	89.42
llama-3b	geometric_shapes	9	77.11	77.45	73.62
llama-3b	geometric_shapes	10	69.63	86.94	81.92
llama-3b	geometric_shapes	11	79.16	74.5	66.1
llama-3b	geometric_shapes	12	74.67	61.32	84.55
llama-3b	geometric_shapes	13	73.37	82.85	79.98
llama-3b	geometric_shapes	14	79.53	78.17	74.36
llama-3b	geometric_shapes	15	86.59	80.58	69.19
llama-3b	geometric_shapes	16	81.25	84.13	60.88
llama-3b	geometric_shapes	17	81.29	82.24	79.18
llama-3b	geometric_shapes	18	89.64	61.42	62
llama-3b	geometric_shapes	19	77.67	72.66	82.33
llama-3b	geometric_shapes	20	65.24	60.17	85.95
llama-3b	geometric_shapes	21	88.14	64.26	87.83
llama-3b	geometric_shapes	22	87.74	72.08	81.3
llama-3b	geometric_shapes	23	86.52	60.84	75.62
llama-3b	geometric_shapes	24	87.34	67.46	84.85
llama-3b	geometric_shapes	25	74.33	68.63	72.42
llama-3b	geometric_shapes	26	75.44	66.39	85.54
llama-3b	geometric_shapes	27	78.05	64.35	80.74
llama-3b	geometric_shapes	28	82.01	68.39	70.52
llama-3b	geometric_shapes	29	74.09	82.62	62.84
llama-3b	geometric_shapes	30	83.53	75.98	71
llama-3b	geometric_shapes	31	78.65	84.93	78.05
llama-3b	geometric_shapes	32	83.76	65.17	75.05
llama-3b	geometric_shapes	33	67.98	82.25	80.71
llama-3b	geometric_shapes	34	67.66	71.81	87.34
llama-3b	geometric_shapes	35	80.28	65.72	60.25
llama-3b	geometric_shapes	36	72.3	82.13	87.87
llama-3b	geometric_shapes	37	84.09	86.6	77.5
llama-3b	geometric_shapes	38	83.42	78.86	73.28
llama-3b	geometric_shapes	39	77.51	75.2	73.91
llama-3b	geometric_shapes	40	89.31	72.14	68.13
llama-3b	geometric_shapes	41	89.51	87.73	76.87
llama-3b	geometric_shapes	42	84.8	79.64	62
llama-3b	geometric_shapes	43	68.45	85.04	87.85
llama-3b	geometric_shapes	44	80.05	80.13	76.85
llama-3b	geometric_shapes	45	87.73	81.26	69.92
llama-3b	geometric_shapes	46	68.94	81.51	74.38
llama-3b	geometric_shapes	47	82.83	82.47	73.88
llama-3b	geometric_shapes	48	84.7	81.56	80.78
llama-3b	geometric_shapes	49	85.81	76.58	87.6
llama-3b	geometric_shapes	50	68.51	80.93	83.91
llama-3b	geometric_shapes	51	82.05	75.33	72.52
llama-3b	geometric_shapes	52	73.27	72.12	83.53
llama-3b	geometric_shapes	53	74.38	79.44	69.8
llama-3b	geometric_shapes	54	70.04	86.11	65.25
llama-3b	geometric_shapes	55	88.36	89.17	67.29
llama-3b	geometric_shapes	56	65.66	86.47	80.79
llama-3b	geometric_shapes	57	75.32	61.96	87.05
llama-3b	geometric_shapes	58	71.76	67.46	66.59
llama-3b	geometric_shapes	59	66.11	66.67	84.97
llama-3b	geometric_shapes	60	66.95	65.83	79.09
llama-3b	geometric_shapes	61	77.16	73.53	68.05
llama-3b	geometric_shapes	62	72.24	68.48	66.48
llama-3b	geometric_shapes	63	78.78	80.45	66.35
llama-3b	geometric_shapes	64	72.62	78.98	85.86
llama-3b	geometric_shapes	65	84.45	75.48	85.37
llama-3b	geometric_shapes	66	72.2	73.33	61.41
llama-3b	geometric_shapes	67	81.35	88.85	75.39
llama-3b	geometric_shapes	68	70.07	80.37	80.95
llama-3b	geometric_shapes	69	72.24	68.73	79.73
llama-3b	geometric_shapes	70	77.79	86.78	72.21
llama-3b	geometric_shapes	71	88.03	88.03	74.44
llama-3b	geometric_shapes	72	74.36	60.23	76.77
llama-3b	geometric_shapes	73	80.24	89.45	67.43
llama-3b	geometric_shapes	74	74.86	83.69	74.64
llama-3b	geometric_shapes	75	69.16	74.42	66.48
llama-3b	geometric_shapes	76	75.5	65.91	61.92
llama-3b	geometric_shapes	77	75.72	68.11	75.75
llama-3b	geometric_shapes	78	72.39	87.37	71.94
llama-3b	geometric_shapes	79	66.63	63.43	80.65
llama-3b	geometric_shapes	80	80.73	65.37	62.48
llama-3b	geometric_shapes	81	76.42	66.26	79.75
llama-3b	geometric_shapes	82	82.61	75.02	65.05
llama-3b	geometric_shapes	83	79.49	73.97	75.75
llama-3b	geometric_shapes	84	65.05	64.3	87.33
llama-3b	geometric_shapes	85	77.51	83.5	64.59
llama-3b	geometric_shapes	86	68.85	86.47	80.89
llama-3b	geometric_shapes	87	80.15	84.51	88.45
llama-3b	geometric_shapes	88	86.21	87.03	84.35
llama-3b	geometric_shapes	89	83.44	77.17	73.03
llama-3b	geometric_shapes	90	71.65	81.97	82.99
llama-3b	geometric_shapes	91	74.36	64.39	87.41
llama-3b	geometric_shapes	92	72.14	89.11	76.89
llama-3b	geometric_shapes	93	67.75	80.19	60.61
llama-3b	geometric_shapes	94	82.46	64.89	70.91
llama-3b	geometric_shapes	95	66.03	63.63	81.34
llama-3b	geometric_shapes	96	68.83	88.9	62.96
llama-3b	geometric_shapes	97	75.17	77.39	79.69
llama-3b	geometric_shapes	98	89.73	74.76	81.45
llama-3b	geometric_shapes	99	65.72	72.33	74.28
llama-3b	geometric_shapes	100	79.85	77.79	71.1
llama-3b	geometric_shapes	101	86.91	64.1	68.66
llama-3b	geometric_shapes	102	85.63	83.12	79.05
llama-3b	geometric_shapes	103	77.22	86.21	83.95
llama-3b	geometric_shapes	104	66.93	85.43	63.21
llama-3b	geometric_shapes	105	78.83	82.97	68.06
llama-3b	geometric_shapes	106	66.27	65.14	73.6
llama-3b	geometric_shapes	107	71.21	61.42	60.99
llama-3b	geometric_shapes	108	66.92	73.11	76.92
llama-3b	geometric_shapes	109	83.65	80.02	75.17
llama-3b	geometric_shapes	110	66.09	88.89	85.65
llama-3b	geometric_shapes	111	72.4	63.05	69.29
llama-3b	geometric_shapes	112	88.1	69.16	78.11
llama-3b	geometric_shapes	113	87.94	85.5	70.29
llama-3b	geometric_shapes	114	87.03	81.61	74.61
llama-3b	geometric_shapes	115	78.3	71.49	74.75
llama-3b	geometric_shapes	116	78.13	75.15	62.57
llama-3b	geometric_shapes	117	76.85	82.11	69.67
llama-3b	geometric_shapes	118	89.97	68.53	86.74
llama-3b	geometric_shapes	119	81.39	74.39	89
llama-3b	geometric_shapes	120	72.65	63.36	71.45
llama-3b	geometric_shapes	121	65.58	65.09	77.6
llama-3b	geometric_shapes	122	85.5	78.75	61.91
llama-3b	geometric_shapes	123	84.23	89.47	66.44
llama-3b	geometric_shapes	124	81.7	69.89	75.8
llama-3b	geometric_shapes	125	75.09	64.24	89.57
llama-3b	geometric_shapes	126	80.1	75.88	77.15
llama-3b	geometric_shapes	127	70.89	69.34	71.4
llama-3b	geometric_shapes	128	69.61	86.1	89.05
llama-3b	geometric_shapes	129	70.62	89.15	69.11
llama-3b	geometric_shapes	130	82.26	61.47	62.24
llama-3b	geometric_shapes	131	79.06	77.45	84.25
llama-3b	geometric_shapes	132	68.75	81.41	63.09
llama-3b	geometric_shapes	133	86.61	87.49	86.94
llama-3b	geometric_shapes	134	67.13	68.17	75.34
llama-3b	geometric_shapes	135	87.78	61.48	86.48
llama-3b	geometric_shapes	136	68.83	76.46	75.67
llama-3b	geometric_shapes	137	76.4	86.52	83.18
llama-3b	geometric_shapes	138	83.6	64.24	62.45
llama-3b	geometric_shapes	139	86.97	61.76	72.22
llama-3b	geometric_shapes	140	82.98	65.52	68.28
llama-3b	geometric_shapes	141	84.62	70.44	66.92
llama-3b	geometric_shapes	142	67.53	71.89	68.54
llama-3b	geometric_shapes	143	80.49	68.21	65.53
llama-3b	geometric_shapes	144	75.78	66.59	86.86
llama-3b	geometric_shapes	145	80	69.19	63.41
llama-3b	geometric_shapes	146	65.43	67.56	65.08
llama-3b	geometric_shapes	147	69.2	72.37	85.91
llama-3b	geometric_shapes	148	84.19	75.15	88.3
llama-3b	geometric_shapes	149	77.36	83.11	86.98
llama-3b	geometric_shapes	150	76.61	61.76	80.5
llama-3b	geometric_shapes	151	83.8	74.24	77.27
llama-3b	geometric_shapes	152	77.65	86.27	66.66
llama-3b	geometric_shapes	153	80.65	73.4	66.14
llama-3b	geometric_shapes	154	70.41	71.75	66.82
llama-3b	geometric_shapes	155	65.77	78.18	82.96
llama-3b	geometric_shapes	156	80	61.89	84.54
llama-3b	geometric_shapes	157	74.38	75.66	60.13
llama-3b	geometric_shapes	158	80.16	86.52	72.94
llama-3b	geometric_shapes	159	83.09	81.67	63.63
llama-3b	geometric_shapes	160	67.07	74.99	78.55
llama-3b	geometric_shapes	161	81.82	62.82	76.1
llama-3b	geometric_shapes	162	74.44	87.84	61.26
llama-3b	geometric_shapes	163	87.84	80.41	86.11
llama-3b	geometric_shapes	164	81.68	75.17	78.24
llama-3b	geometric_shapes	165	68.02	76.95	68.66
llama-3b	geometric_shapes	166	74.94	86.27	79.49
llama-3b	geometric_shapes	167	70.12	84.21	73.4
llama-3b	geometric_shapes	168	74.86	87.87	88.29
llama-3b	geometric_shapes	169	81.72	66.39	65.31
llama-3b	geometric_shapes	170	70.04	74.69	86.23
llama-3b	geometric_shapes	171	77.25	75.06	66.86
llama-3b	geometric_shapes	172	66.19	80.23	64.99
llama-3b	geometric_shapes	173	69.3	71.7	88.3
llama-3b	geometric_shapes	174	66.69	80.54	69.08
llama-3b	geometric_shapes	175	82.56	60.34	81.09
llama-3b	geometric_shapes	176	88.83	81.62	83.22
llama-3b	geometric_shapes	177	80.02	68.04	75.71
llama-3b	geometric_shapes	178	73.89	82.28	60.73
llama-3b	geometric_shapes	179	71.02	73.84	83.7
llama-3b	geometric_shapes	180	84.33	78.6	65.42
llama-3b	geometric_shapes	181	80.16	72.63	89.18
llama-3b	geometric_shapes	182	68.24	86.21	62.82
llama-3b	geometric_shapes	183	77.87	62.73	86.15
llama-3b	geometric_shapes	184	68.68	61.54	73.52
llama-3b	geometric_shapes	185	86	84.78	85.22
llama-3b	geometric_shapes	186	65.2	66.45	78.58
llama-3b	geometric_shapes	187	69.01	84.53	87.86
llama-3b	geometric_shapes	188	72.06	62.61	82.03
llama-3b	geometric_shapes	189	75.23	79.74	68.95
llama-3b	geometric_shapes	190	81.75	66.05	73.87
llama-3b	geometric_shapes	191	86.91	72.22	75.68
llama-3b	geometric_shapes	192	74.29	75.4	69.27
llama-3b	geometric_shapes	193	85.67	63.79	79.73
llama-3b	geometric_shapes	194	69.65	87.85	85.34
llama-3b	geometric_shapes	195	82.39	78.78	78.6
llama-3b	geometric_shapes	196	83.87	75.5	62.31
llama-3b	geometric_shapes	197	73.2	64.5	78.64
llama-3b	geometric_shapes	198	75.37	87.64	84.07
llama-3b	geometric_shapes	199	74.76	70.13	88.21
llama-3b	geometric_shapes	200	86.19	74.09	60.38
llama-3b	geometric_shapes	201	67.65	75.86	70.78
llama-3b	geometric_shapes	202	69.38	79.99	84.6
llama-3b	geometric_shapes	203	82.15	64.01	68.93
llama-3b	geometric_shapes	204	74.25	67.58	86.22
llama-3b	geometric_shapes	205	77.79	73.7	68.62
llama-3b	geometric_shapes	206	82.12	89.36	61.12
llama-3b	geometric_shapes	207	89.19	68.78	69.92
llama-3b	geometric_shapes	208	76.77	79.98	75.09
llama-3b	geometric_shapes	209	69.17	74.97	74.82
llama-3b	geometric_shapes	210	67.36	75.28	80.64
llama-3b	geometric_shapes	211	74.6	83.62	89.21
llama-3b	geometric_shapes	212	74.92	67.06	84.6
llama-3b	geometric_shapes	213	78.39	63.56	68.8
llama-3b	geometric_shapes	214	66.41	61.98	65.12
llama-3b	geometric_shapes	215	87.23	84.91	67.19
llama-3b	geometric_shapes	216	84.17	86.72	86.94
llama-3b	geometric_shapes	217	83.7	81.65	61.7
llama-3b	geometric_shapes	218	78.38	81.24	61.98
llama-3b	geometric_shapes	219	87.07	84.88	80.05
llama-3b	geometric_shapes	220	81.03	74.03	86.65
llama-3b	geometric_shapes	221	81.78	67.48	68.9
llama-3b	geometric_shapes	222	78.95	80.32	81.2
llama-3b	geometric_shapes	223	85.7	60.7	74.26
llama-3b	geometric_shapes	224	65.89	67.9	67.54
llama-3b	geometric_shapes	225	85.16	66.01	62.78
llama-3b	geometric_shapes	226	67.24	80.93	72.04
llama-3b	geometric_shapes	227	69.22	65.81	84.18
llama-3b	geometric_shapes	228	66.48	67.49	86.7
llama-3b	geometric_shapes	229	87.8	83.26	84.12
llama-3b	geometric_shapes	230	81.8	81.14	89.12
llama-3b	geometric_shapes	231	88.68	68.19	77.75
llama-3b	geometric_shapes	232	85.61	86.81	64.88
llama-3b	geometric_shapes	233	76.21	62.57	70
llama-3b	geometric_shapes	234	72.26	82.4	71.6
llama-3b	geometric_shapes	235	81.05	80.9	82.08
llama-3b	geometric_shapes	236	87.17	83.18	63.41
llama-3b	geometric_shapes	237	77.52	65.68	67.78
llama-3b	geometric_shapes	238	73.49	68.1	62.29
llama-3b	geometric_shapes	239	84.68	64.84	69.76
llama-3b	geometric_shapes	240	84.43	74.76	72.21
llama-3b	geometric_shapes	241	84.19	86.88	86.13
llama-3b	geometric_shapes	242	71.34	70.99	67.62
llama-3b	geometric_shapes	243	76.4	73.19	85.48
llama-3b	geometric_shapes	244	67.42	64.74	87.52
llama-3b	geometric_shapes	245	89.73	66.6	89.61
llama-3b	geometric_shapes	246	66.55	74.35	62.83
llama-3b	geometric_shapes	247	89.63	73.15	75.38
llama-3b	geometric_shapes	248	87.21	61.36	62.3
llama-3b	geometric_shapes	249	82.51	81.93	73.38
llama-3b	hyperbaton	0	67.79	67.9	73.58
llama-3b	hyperbaton	1	84.43	87.4	70.7
llama-3b	hyperbaton	2	85.21	75.14	83.13
llama-3b	hyperbaton	3	83.31	84.73	70.25
llama-3b	hyperbaton	4	71.04	81.65	82.9
llama-3b	hyperbaton	5	80.6	83.35	64.38
llama-3b	hyperbaton	6	88.55	82.71	69.47
llama-3b	hyperbaton	7	72.58	70.36	78.84
llama-3b	hyperbaton	8	67.5	85.81	73.31
llama-3b	hyperbaton	9	88.78	65.95	69.03
llama-3b	hyperbaton	10	65.86	67.21	81.15
llama-3b	hyperbaton	11	74.65	80.54	77.66
llama-3b	hyperbaton	12	84.58	67.62	83.18
llama-3b	hyperbaton	13	66.92	62.37	78.99
llama-3b	hyperbaton	14	78.33	67.16	80.97
llama-3b	hyperbaton	15	77.1	62.64	86.64
llama-3b	hyperbaton	16	66.71	84.16	70.79
llama-3b	hyperbaton	17	89.47	76.03	79.98
llama-3b	hyperbaton	18	68.84	82.32	74.91
llama-3b	hyperbaton	19	67.68	69.23	60.17
llama-3b	hyperbaton	20	89.92	69.77	62.74
llama-3b	hyperbaton	21	78.5	85.78	78.82
llama-3b	hyperbaton	22	86.78	69.01	63.15
llama-3b	hyperbaton	23	75.4	66.94	66.91
llama-3b	hyperbaton	24	66.47	88.27	76.81
llama-3b	hyperbaton	25	84.73	75.67	67.7
llama-3b	hyperbaton	26	67.49	75.91	63.09
llama-3b	hyperbaton	27	73.48	70.31	85.14
llama-3b	hyperbaton	28	83.81	68.52	81.93
llama-3b	hyperbaton	29	82.92	74.05	77.72
llama-3b	hyperbaton	30	85.85	85.17	78.33
llama-3b	hyperbaton	31	89.07	89	69.93
llama-3b	hyperbaton	32	89.48	61.34	73.25
llama-3b	hyperbaton	33	84.23	60.57	61.39
llama-3b	hyperbaton	34	77.46	86.84	66.63
llama-3b	hyperbaton	35	81.4	88.8	68.05
llama-3b	hyperbaton	36	65.64	82.5	69.98
llama-3b	hyperbaton	37	77.28	67.32	80.7
llama-3b	hyperbaton	38	69.06	86.73	77.89
llama-3b	hyperbaton	39	65.27	69.56	75.68
llama-3b	hyperbaton	40	88.98	89.15	71.08
llama-3b	hyperbaton	41	85.08	86.32	78.98
llama-3b	hyperbaton	42	81.25	84.71	73.57
llama-3b	hyperbaton	43	84.06	72.51	77.08
llama-3b	hyperbaton	44	75.2	79.13	86.47
llama-3b	hyperbaton	45	76.28	60.55	63.56
llama-3b	hyperbaton	46	76.39	67.64	83.11
llama-3b	hyperbaton	47	69.42	89.63	84.21
llama-3b	hyperbaton	48	74.06	64.98	71.32
llama-3b	hyperbaton	49	86.15	89.22	79.14
llama-3b	hyperbaton	50	75.76	67.7	66.62
llama-3b	hyperbaton	51	86.8	74.28	81.05
llama-3b	hyperbaton	52	84.19	82.25	72.07
llama-3b	hyperbaton	53	86.21	84.07	60.84
llama-3b	hyperbaton	54	77.72	66.45	66.73
llama-3b	hyperbaton	55	84.99	65.46	79.55
llama-3b	hyperbaton	56	83.84	76.54	81.66
llama-3b	hyperbaton	57	69.03	73.77	63.56
llama-3b	hyperbaton	58	79.85	87.97	70.11
llama-3b	hyperbaton	59	72.36	78.76	88.71
llama-3b	hyperbaton	60	71.66	80.59	83.27
llama-3b	hyperbaton	61	78.07	64.69	81.13
llama-3b	hyperbaton	62	86.74	81.03	74.46
llama-3b	hyperbaton	63	73.31	82.45	67.97
llama-3b	hyperbaton	64	88.01	68.56	65.48
llama-3b	hyperbaton	65	85.5	67.11	84.59
llama-3b	hyperbaton	66	73.23	75.28	68.49
llama-3b	hyperbaton	67	77.49	84.25	82.16
llama-3b	hyperbaton	68	71.29	66.36	82.27
llama-3b	hyperbaton	69	86.53	82.27	70.92
llama-3b	hyperbaton	70	80.17	85.22	68.71
llama-3b	hyperbaton	71	78.82	78.04	76.33
llama-3b	hyperbaton	72	80.14	70.52	79.31
llama-3b	hyperbaton	73	75.85	87.64	65.3
llama-3b	hyperbaton	74	85.67	82.5	74.45
llama-3b	hyperbaton	75	86.43	66.32	72.4
llama-3b	hyperbaton	76	82.52	72.93	72.72
llama-3b	hyperbaton	77	68.58	87.96	69.55
llama-3b	hyperbaton	78	74.68	67.9	86.44
llama-3b	hyperbaton	79	76.12	78.78	88
llama-3b	hyperbaton	80	70.82	66.42	65.68
llama-3b	hyperbaton	81	69.73	72.78	64.72
llama-3b	hyperbaton	82	67.45	81.32	89
llama-3b	hyperbaton	83	70.37	78.65	71.71
llama-3b	hyperbaton	84	67.94	80.29	85.8
llama-3b	hyperbaton	85	67.58	69.89	72.14
llama-3b	hyperbaton	86	75.55	72.98	77.12
llama-3b	hyperbaton	87	83.64	60.64	74.75
llama-3b	hyperbaton	88	83.89	86.25	73.08
llama-3b	hyperbaton	89	89.9	81.01	87
llama-3b	hyperbaton	90	77.99	74.46	71.55
llama-3b	hyperbaton	91	74.86	64.38	87.53
llama-3b	hyperbaton	92	76.64	82.37	82.35
llama-3b	hyperbaton	93	67.69	62.35	66.1
llama-3b	hyperbaton	94	66.26	82.47	68.13
llama-3b	hyperbaton	95	69.73	77.37	87.36
llama-3b	hyperbaton	96	83.19	64.65	87.94
llama-3b	hyperbaton	97	72.29	73.94	62.24
llama-3b	hyperbaton	98	70.52	72.09	82.5
llama-3b	hyperbaton	99	86.75	76.7	80.3
llama-3b	hyperbaton	100	82.6	77.15	82.9
llama-3b	hyperbaton	101	67.05	84.29	69.99
llama-3b	hyperbaton	102	80.77	88.53	61.68
llama-3b	hyperbaton	103	84.49	60.27	69.59
llama-3b	hyperbaton	104	66.76	66.76	72.53
llama-3b	hyperbaton	105	83.39	75.94	68.71
llama-3b	hyperbaton	106	83.25	89.35	63.56
llama-3b	hyperbaton	107	76.54	81.33	67.44
llama-3b	hyperbaton	108	71.04	80.21	78.92
llama-3b	hyperbaton	109	85.34	63	66.03
llama-3b	hyperbaton	110	80.21	63.81	83.66
llama-3b	hyperbaton	111	86.27	69.48	88.99
llama-3b	hyperbaton	112	87.97	89.77	80.25
llama-3b	hyperbaton	113	89.29	86.76	70.76
llama-3b	hyperbaton	114	87.27	63.88	70.72
llama-3b	hyperbaton	115	78.04	89.46	70.95
llama-3b	hyperbaton	116	73.15	89.98	63.53
llama-3b	hyperbaton	117	85.01	75.2	67.91
llama-3b	hyperbaton	118	68.73	73.64	73.49
llama-3b	hyperbaton	119	65.86	87.27	71.71
llama-3b	hyperbaton	120	76.94	65.73	82.38
llama-3b	hyperbaton	121	72.41	64.13	64.28
llama-3b	hyperbaton	122	77.1	87.94	79.53
llama-3b	hyperbaton	123	80.4	65.62	63.62
llama-3b	hyperbaton	124	66.79	71	68.66
llama-3b	hyperbaton	125	79.65	87.25	73.89
llama-3b	hyperbaton	126	74.58	83.31	85.74
llama-3b	hyperbaton	127	73.56	72.95	69.08
llama-3b	hyperbaton	128	73.77	81.94	77
llama-3b	hyperbaton	129	69.99	75.83	82.46
llama-3b	hyperbaton	130	87.01	89.26	89.03
llama-3b	hyperbaton	131	72.55	82.65	86.24
llama-3b	hyperbaton	132	78.17	76.86	62.22
llama-3b	hyperbaton	133	73.99	88.5	77.86
llama-3b	hyperbaton	134	79.28	70.61	66.69
llama-3b	hyperbaton	135	78.69	84.42	76.65
llama-3b	hyperbaton	136	73.19	73.07	84.56
llama-3b	hyperbaton	137	87.63	87.45	63.38
llama-3b	hyperbaton	138	83.91	62.4	85.23
llama-3b	hyperbaton	139	84.22	87.53	81.54
llama-3b	hyperbaton	140	87.59	64.05	79.77
llama-3b	hyperbaton	141	78.31	86.76	62.21
llama-3b	hyperbaton	142	81.62	84.2	74.58
llama-3b	hyperbaton	143	68.37	72.25	86.21
llama-3b	hyperbaton	144	82.58	65.38	88.61
llama-3b	hyperbaton	145	78.69	63.33	66.95
llama-3b	hyperbaton	146	71.95	81.05	71.98
llama-3b	hyperbaton	147	79.43	84.38	76.65
llama-3b	hyperbaton	148	85.71	62.37	77.61
llama-3b	hyperbaton	149	73.76	61.15	88.32
llama-3b	hyperbaton	150	74.6	86.24	60.13
llama-3b	hyperbaton	151	73.52	64.22	72.11
llama-3b	hyperbaton	152	87.05	66.94	82.28
llama-3b	hyperbaton	153	89.76	68.57	69.39
llama-3b	hyperbaton	154	68.81	74.63	60.3
llama-3b	hyperbaton	155	86.45	76.73	66.11
llama-3b	hyperbaton	156	87.62	69.2	81.31
llama-3b	hyperbaton	157	65.57	81.5	80.77
llama-3b	hyperbaton	158	86.56	75.74	84.7
llama-3b	hyperbaton	159	69.83	64.22	80.97
llama-3b	hyperbaton	160	75.63	68.82	64.45
llama-3b	hyperbaton	161	88.42	60.67	83.3
llama-3b	hyperbaton	162	71.15	83.15	63.03
llama-3b	hyperbaton	163	89.13	72.16	71.9
llama-3b	hyperbaton	164	85.17	85.17	70.65
llama-3b	hyperbaton	165	79.83	83.89	72.42
llama-3b	hyperbaton	166	65.74	86.67	89.43
llama-3b	hyperbaton	167	81.33	73.32	75.31
llama-3b	hyperbaton	168	76.54	63.03	61.95
llama-3b	hyperbaton	169	66.29	64.46	63.75
llama-3b	hyperbaton	170	73.76	65.74	71.81
llama-3b	hyperbaton	171	79.49	82.54	70.34
llama-3b	hyperbaton	172	77.67	74.03	83.54
llama-3b	hyperbaton	173	83.75	85.9	71.27
llama-3b	hyperbaton	174	83.96	73.2	61.52
llama-3b	hyperbaton	175	77.44	67.82	60.44
llama-3b	hyperbaton	176	70.18	79.2	64.31
llama-3b	hyperbaton	177	79.41	77.36	83.91
llama-3b	hyperbaton	178	79.77	73.74	70.7
llama-3b	hyperbaton	179	74.05	80.9	88.9
llama-3b	hyperbaton	180	76.47	84.64	84.17
llama-3b	hyperbaton	181	76.73	64.63	67.09
llama-3b	hyperbaton	182	86.88	83.61	68.64
llama-3b	hyperbaton	183	76.83	73.09	61.35
llama-3b	hyperbaton	184	74.67	61.16	69.3
llama-3b	hyperbaton	185	79.77	64.14	62.98
llama-3b	hyperbaton	186	69.78	87.76	73.88
llama-3b	hyperbaton	187	72.78	87.8	62.63
llama-3b	hyperbaton	188	80.48	88.58	74.49
llama-3b	hyperbaton	189	86.45	70.52	63.86
llama-3b	hyperbaton	190	86.32	86.73	74.36
llama-3b	hyperbaton	191	76.02	82.75	69.92
llama-3b	hyperbaton	192	81.94	87.97	86.25
llama-3b	hyperbaton	193	74.78	68.11	63.14
llama-3b	hyperbaton	194	72.83	83.56	62.85
llama-3b	hyperbaton	195	65.4	87.42	80.2
llama-3b	hyperbaton	196	68.31	83.69	66.26
llama-3b	hyperbaton	197	77.59	61.63	83.57
llama-3b	hyperbaton	198	89.31	75.41	72.75
llama-3b	hyperbaton	199	88.45	81.48	63.58
llama-3b	hyperbaton	200	83.92	69.96	72.94
llama-3b	hyperbaton	201	66.73	69.45	81.05
llama-3b	hyperbaton	202	67.32	83.45	64.21
llama-3b	hyperbaton	203	70.41	83.15	79.37
llama-3b	hyperbaton	204	84.53	82.12	60.47
llama-3b	hyperbaton	205	72.94	72.25	65.22
llama-3b	hyperbaton	206	79.9	87.19	87.74
llama-3b	hyperbaton	207	88.96	78.29	72.35
llama-3b	hyperbaton	208	73.17	62.62	60.63
llama-3b	hyperbaton	209	84.93	79.96	88.07
llama-3b	hyperbaton	210	84.13	67.13	72.58
llama-3b	hyperbaton	211	84.84	79.42	86.05
llama-3b	hyperbaton	212	77.69	85.91	74.19
llama-3b	hyperbaton	213	85.16	89.13	81.48
llama-3b	hyperbaton	214	74.6	85.75	70.02
llama-3b	hyperbaton	215	86	86.43	75.97
llama-3b	hyperbaton	216	87.05	77.08	69.1
llama-3b	hyperbaton	217	73.23	60.76	70.13
llama-3b	hyperbaton	218	68.62	73.13	83.18
llama-3b	hyperbaton	219	87.92	84.69	80.99
llama-3b	hyperbaton	220	87.4	86.52	60.11
llama-3b	hyperbaton	221	79.65	68.37	83.98
llama-3b	hyperbaton	222	84.11	89.11	78.51
llama-3b	hyperbaton	223	71.31	60.9	79.14
llama-3b	hyperbaton	224	76.3	74.69	73.9
llama-3b	hyperbaton	225	77.73	78.91	73.17
llama-3b	hyperbaton	226	74.86	67.94	69.23
llama-3b	hyperbaton	227	78.08	82.03	65.42
llama-3b	hyperbaton	228	68.09	79.94	77.06
llama-3b	hyperbaton	229	76.5	75.57	72.26
llama-3b	hyperbaton	230	68.46	72.48	72.74
llama-3b	hyperbaton	231	76.38	75.48	66.18
llama-3b	hyperbaton	232	70.03	81.47	84.91
llama-3b	hyperbaton	233	66.15	71.27	81.99
llama-3b	hyperbaton	234	73.97	80.27	81.28
llama-3b	hyperbaton	235	67.71	75.82	78.13
llama-3b	hyperbaton	236	83.24	82.13	85.06
llama-3b	hyperbaton	237	79.63	74.58	72.74
llama-3b	hyperbaton	238	67.97	81.36	84
llama-3b	hyperbaton	239	67.23	76.12	73.07
llama-3b	hyperbaton	240	85.72	66.68	63.62
llama-3b	hyperbaton	241	69.92	67.53	79.07
llama-3b	hyperbaton	242	74.82	78.52	85.23
llama-3b	hyperbaton	243	68.53	60.46	85.54
llama-3b	hyperbaton	244	69.99	64.31	69.41
llama-3b	hyperbaton	245	78.87	76.85	62.05
llama-3b	hyperbaton	246	68.01	70.11	88.87
llama-3b	hyperbaton	247	86.38	62.98	61.17
llama-3b	hyperbaton	248	88.32	80.17	68.4
llama-3b	hyperbaton	249	70.16	86.87	75.24
llama-3b	logical_deduction_five_objects	0	66.13	78.86	72.88
llama-3b	logical_deduction_five_objects	1	77.16	86.94	66.25
llama-3b	logical_deduction_five_objects	2	71.99	73.03	70.25
llama-3b	logical_deduction_five_objects	3	69.62	69.84	76.5
llama-3b	logical_deduction_five_objects	4	88.07	86.3	71.44
llama-3b	logical_deduction_five_objects	5	70.44	72.38	64.49
llama-3b	logical_deduction_five_objects	6	70.65	68.86	84.01
llama-3b	logical_deduction_five_objects	7	66.53	82.88	63.42
llama-3b	logical_deduction_five_objects	8	89.95	79.1	78.48
llama-3b	logical_deduction_five_objects	9	87.07	65.69	85.58
llama-3b	logical_deduction_five_objects	10	86.94	82.99	87.42
llama-3b	logical_deduction_five_objects	11	69.85	89.51	65.13
llama-3b	logical_deduction_five_objects	12	77.67	74.04	77.17
llama-3b	logical_deduction_five_objects	13	68.77	76.45	67.93
llama-3b	logical_deduction_five_objects	14	85.93	66.48	64.55
llama-3b	logical_deduction_five_objects	15	84.3	88.98	85.83
llama-3b	logical_deduction_five_objects	16	65.87	84.21	66.66
llama-3b	logical_deduction_five_objects	17	65.35	66.78	87.16
llama-3b	logical_deduction_five_objects	18	78.11	73.39	76.82
llama-3b	logical_deduction_five_objects	19	87.8	80.29	86.65
llama-3b	logical_deduction_five_objects	20	75.4	82.81	79.54
llama-3b	logical_deduction_five_objects	21	80.97	70.36	65.25
llama-3b	logical_deduction_five_objects	22	79.29	62.62	85.5
llama-3b	logical_deduction_five_objects	23	71.73	74.17	71.2
llama-3b	logical_deduction_five_objects	24	89.97	89.49	77.6
llama-3b	logical_deduction_five_objects	25	72.18	74.49	89.65
llama-3b	logical_deduction_five_objects	26	89.3	78.06	89.5
llama-3b	logical_deduction_five_objects	27	80.39	78.52	83.16
llama-3b	logical_deduction_five_objects	28	79.48	72.3	84.5
llama-3b	logical_deduction_five_objects	29	89.18	67.91	80.58
llama-3b	logical_deduction_five_objects	30	81.53	74.46	72.72
llama-3b	logical_deduction_five_objects	31	83.81	73.55	81.72
llama-3b	logical_deduction_five_objects	32	68.34	76.13	83.63
llama-3b	logical_deduction_five_objects	33	74.06	83.3	85.66
llama-3b	logical_deduction_five_objects	34	78.57	87.76	66.83
llama-3b	logical_deduction_five_objects	35	81.43	82.57	71.75
llama-3b	logical_deduction_five_objects	36	79.79	78.38	82.38
llama-3b	logical_deduction_five_objects	37	87.24	61.75	65.61
llama-3b	logical_deduction_five_objects	38	75.45	72.41	76.34
llama-3b	logical_deduction_five_objects	39	76.62	82.55	76.02
llama-3b	logical_deduction_five_objects	40	65.29	68.57	67.84
llama-3b	logical_deduction_five_objects	41	78.72	76.49	83.97
llama-3b	logical_deduction_five_objects	42	86.16	82.63	82.15
llama-3b	logical_deduction_five_objects	43	86.69	83.24	74.23
llama-3b	logical_deduction_five_objects	44	87.42	78.98	84.73
llama-3b	logical_deduction_five_objects	45	86.66	86.17	85.43
llama-3b	logical_deduction_five_objects	46	89.29	77.95	64.31
llama-3b	logical_deduction_five_objects	47	89.41	63.15	77.17
llama-3b	logical_deduction_five_objects	48	86.65	89.99	75.97
llama-3b	logical_deduction_five_objects	49	74.82	66.61	86.04
llama-3b	logical_deduction_five_objects	50	74.49	74.94	62.03
llama-3b	logical_deduction_five_objects	51	69.3	62.07	62.48
llama-3b	logical_deduction_five_objects	52	81.58	74.67	81.49
llama-3b	logical_deduction_five_objects	53	84.91	62.78	84.87
llama-3b	logical_deduction_five_objects	54	73.77	74.19	73.99
llama-3b	logical_deduction_five_objects	55	77.12	86.19	74.07
llama-3b	logical_deduction_five_objects	56	79	80.53	61.46
llama-3b	logical_deduction_five_objects	57	74.43	74.56	63.35
llama-3b	logical_deduction_five_objects	58	89.79	79.21	69.5
llama-3b	logical_deduction_five_objects	59	65.96	61.32	88.55
llama-3b	logical_deduction_five_objects	60	84.53	74.23	77.16
llama-3b	logical_deduction_five_objects	61	76.77	81.31	74.15
llama-3b	logical_deduction_five_objects	62	69.16	85.68	69.64
llama-3b	logical_deduction_five_objects	63	65.11	68.84	68.28
llama-3b	logical_deduction_five_objects	64	82.13	77.53	68.78
llama-3b	logical_deduction_five_objects	65	65.48	69.58	71.86
llama-3b	logical_deduction_five_objects	66	78.35	77.9	63.06
llama-3b	logical_deduction_five_objects	67	83.66	70.1	60.57
llama-3b	logical_deduction_five_objects	68	78.2	85.98	81.8
llama-3b	logical_deduction_five_objects	69	89.9	73.04	74.53
llama-3b	logical_deduction_five_objects	70	85.07	75.8	60.94
llama-3b	logical_deduction_five_objects	71	66.21	76.15	87.23
llama-3b	logical_deduction_five_objects	72	76.08	62.89	73.42
llama-3b	logical_deduction_five_objects	73	85.09	88.66	76.92
llama-3b	logical_deduction_five_objects	74	75.27	83.76	72.91
llama-3b	logical_deduction_five_objects	75	73.17	60.63	71.59
llama-3b	logical_deduction_five_objects	76	65.1	73.24	81.88
llama-3b	logical_deduction_five_objects	77	81.09	71.33	76.76
llama-3b	logical_deduction_five_objects	78	68.8	86.63	67
llama-3b	logical_deduction_five_objects	79	80.99	83.4	63.31
llama-3b	logical_deduction_five_objects	80	71.22	64.81	80.66
llama-3b	logical_deduction_five_objects	81	86.87	86.24	80.33
llama-3b	logical_deduction_five_objects	82	67.05	76.5	75.55
llama-3b	logical_deduction_five_objects	83	78.32	89.16	87.44
llama-3b	logical_deduction_five_objects	84	74.19	69	64.86
llama-3b	logical_deduction_five_objects	85	88.18	60.97	67.79
llama-3b	logical_deduction_five_objects	86	87.33	89.02	73.46
llama-3b	logical_deduction_five_objects	87	88.99	86.38	73.66
llama-3b	logical_deduction_five_objects	88	71.83	80.4	61.28
llama-3b	logical_deduction_five_objects	89	65.08	86.56	68.31
llama-3b	logical_deduction_five_objects	90	84.94	66.69	60.52
llama-3b	logical_deduction_five_objects	91	80.97	85.47	60.25
llama-3b	logical_deduction_five_objects	92	75.63	63.71	72.18
llama-3b	logical_deduction_five_objects	93	82.18	60.18	61.05
llama-3b	logical_deduction_five_objects	94	82.45	71.86	73.99
llama-3b	logical_deduction_five_objects	95	72.52	70.42	74.38
llama-3b	logical_deduction_five_objects	96	76.45	70.38	73.6
llama-3b	logical_deduction_five_objects	97	77.53	75.16	82.94
llama-3b	logical_deduction_five_objects	98	70.56	63.11	66.15
llama-3b	logical_deduction_five_objects	99	82.44	63.63	74.24
llama-3b	logical_deduction_five_objects	100	87.98	68.1	69.95
llama-3b	logical_deduction_five_objects	101	88.95	72.68	79.52
llama-3b	logical_deduction_five_objects	102	73.94	67.53	73.58
llama-3b	logical_deduction_five_objects	103	89.47	78.59	79.96
llama-3b	logical_deduction_five_objects	104	69.95	86.53	77.79
llama-3b	logical_deduction_five_objects	105	71.37	70.87	63.91
llama-3b	logical_deduction_five_objects	106	68.77	64.4	85.4
llama-3b	logical_deduction_five_objects	107	72.16	81.56	86.79
llama-3b	logical_deduction_five_objects	108	75.67	84.22	74.77
llama-3b	logical_deduction_five_objects	109	77.65	69.58	61.04
llama-3b	logical_deduction_five_objects	110	77.86	76.45	84.98
llama-3b	logical_deduction_five_objects	111	66.6	80.27	72.48
llama-3b	logical_deduction_five_objects	112	88.35	72.55	71.55
llama-3b	logical_deduction_five_objects	113	71.87	61.49	82.82
llama-3b	logical_deduction_five_objects	114	88.38	88.6	76.54
llama-3b	logical_deduction_five_objects	115	89.06	78.61	82.8
llama-3b	logical_deduction_five_objects	116	82.66	84.21	76.22
llama-3b	logical_deduction_five_objects	117	85.06	78.66	85.66
llama-3b	logical_deduction_five_objects	118	68.03	78.42	64.22
llama-3b	logical_deduction_five_objects	119	65.47	63.24	61.55
llama-3b	logical_deduction_five_objects	120	67.94	62.48	88.79
llama-3b	logical_deduction_five_objects	121	79.07	88.14	86.47
llama-3b	logical_deduction_five_objects	122	81.47	78.5	85.7
llama-3b	logical_deduction_five_objects	123	66.38	67.57	77.09
llama-3b	logical_deduction_five_objects	124	75.09	62.27	74.39
llama-3b	logical_deduction_five_objects	125	66.92	89.25	79.32
llama-3b	logical_deduction_five_objects	126	79.8	76.43	72.21
llama-3b	logical_deduction_five_objects	127	77.84	62.48	89.2
llama-3b	logical_deduction_five_objects	128	82.89	75.12	73.41
llama-3b	logical_deduction_five_objects	129	80.41	80.53	66.65
llama-3b	logical_deduction_five_objects	130	86.24	64.36	75.52
llama-3b	logical_deduction_five_objects	131	71.69	89.64	72.96
llama-3b	logical_deduction_five_objects	132	69.67	88.69	65.65
llama-3b	logical_deduction_five_objects	133	68.1	63.27	66.47
llama-3b	logical_deduction_five_objects	134	66.54	65.53	62.05
llama-3b	logical_deduction_five_objects	135	86.62	88.61	79.92
llama-3b	logical_deduction_five_objects	136	70.82	82.08	68.77
llama-3b	logical_deduction_five_objects	137	68.9	66.14	74.45
llama-3b	logical_deduction_five_objects	138	81.09	63.21	86.36
llama-3b	logical_deduction_five_objects	139	83.64	75.74	60.02
llama-3b	logical_deduction_five_objects	140	73.73	74.51	61.37
llama-3b	logical_deduction_five_objects	141	66.18	67.02	68.63
llama-3b	logical_deduction_five_objects	142	66.43	66.29	81.59
llama-3b	logical_deduction_five_objects	143	69.49	77.25	87.37
llama-3b	logical_deduction_five_objects	144	87.82	75.44	77.38
llama-3b	logical_deduction_five_objects	145	86.91	80.25	74.4
llama-3b	logical_deduction_five_objects	146	71.9	82.2	70.97
llama-3b	logical_deduction_five_objects	147	85.36	84.79	67.78
llama-3b	logical_deduction_five_objects	148	80.75	60.43	73.21
llama-3b	logical_deduction_five_objects	149	83.8	76.29	75.05
llama-3b	logical_deduction_five_objects	150	75.47	65.59	69.08
llama-3b	logical_deduction_five_objects	151	74.01	66.77	79.09
llama-3b	logical_deduction_five_objects	152	87.47	75.41	74.77
llama-3b	logical_deduction_five_objects	153	80.28	76.14	81.77
llama-3b	logical_deduction_five_objects	154	83.54	79.74	88.03
llama-3b	logical_deduction_five_objects	155	85.32	76.95	60.05
llama-3b	logical_deduction_five_objects	156	75.53	73.87	61.11
llama-3b	logical_deduction_five_objects	157	86.2	80.19	71.49
llama-3b	logical_deduction_five_objects	158	76.51	80.49	78.28
llama-3b	logical_deduction_five_objects	159	68.29	69.88	73.62
llama-3b	logical_deduction_five_objects	160	73.98	61.49	64.33
llama-3b	logical_deduction_five_objects	161	88.39	71.45	83.17
llama-3b	logical_deduction_five_objects	162	87.56	87.76	63.89
llama-3b	logical_deduction_five_objects	163	75.39	76.32	60.21
llama-3b	logical_deduction_five_objects	164	74.51	88.68	81.18
llama-3b	logical_deduction_five_objects	165	86.31	82.54	85.24
llama-3b	logical_deduction_five_objects	166	67.66	77.09	84.15
llama-3b	logical_deduction_five_objects	167	73.11	62.19	79.32
llama-3b	logical_deduction_five_objects	168	66.2	84.62	67.44
llama-3b	logical_deduction_five_objects	169	83.92	84.99	70.95
llama-3b	logical_deduction_five_objects	170	68.37	60.56	68.94
llama-3b	logical_deduction_five_objects	171	88.11	64.3	69
llama-3b	logical_deduction_five_objects	172	86.83	63.87	81.6
llama-3b	logical_deduction_five_objects	173	86.65	68.62	76.01
llama-3b	logical_deduction_five_objects	174	80.94	77.17	72.11
llama-3b	logical_deduction_five_objects	175	88.8	62.62	70.51
llama-3b	logical_deduction_five_objects	176	84.84	83.41	73.36
llama-3b	logical_deduction_five_objects	177	75.58	70.52	78.68
llama-3b	logical_deduction_five_objects	178	77.86	68.23	61.56
llama-3b	logical_deduction_five_objects	179	87.65	62.84	81.77
llama-3b	logical_deduction_five_objects	180	65.6	64.8	60.98
llama-3b	logical_deduction_five_objects	181	72.45	76.25	81.63
llama-3b	logical_deduction_five_objects	182	88.79	88.27	78.7
llama-3b	logical_deduction_five_objects	183	80.43	87.68	74.85
llama-3b	logical_deduction_five_objects	184	87.78	73.65	67.55
llama-3b	logical_deduction_five_objects	185	85.96	84.78	65.05
llama-3b	logical_deduction_five_objects	186	71.84	82.75	79.54
llama-3b	logical_deduction_five_objects	187	71.61	80.14	76.16
llama-3b	logical_deduction_five_objects	188	66.55	65.35	62.15
llama-3b	logical_deduction_five_objects	189	71.01	79.18	86.53
llama-3b	logical_deduction_five_objects	190	75.79	87.22	88.42
llama-3b	logical_deduction_five_objects	191	66.76	67.6	89.75
llama-3b	logical_deduction_five_objects	192	73.37	84.41	72.92
llama-3b	logical_deduction_five_objects	193	80.34	72.26	64.87
llama-3b	logical_deduction_five_objects	194	70.38	88.26	64.05
llama-3b	logical_deduction_five_objects	195	80.62	67.69	80.9
llama-3b	logical_deduction_five_objects	196	88.07	74.97	65.25
llama-3b	logical_deduction_five_objects	197	67.83	82.9	68.86
llama-3b	logical_deduction_five_objects	198	72.8	67.63	63.29
llama-3b	logical_deduction_five_objects	199	73.63	61.42	86.18
llama-3b	logical_deduction_five_objects	200	89.81	72.6	65.19
llama-3b	logical_deduction_five_objects	201	86.17	72.49	88.33
llama-3b	logical_deduction_five_objects	202	82.93	87.47	69.62
llama-3b	logical_deduction_five_objects	203	70.19	65.31	66.59
llama-3b	logical_deduction_five_objects	204	80.26	88.39	89.37
llama-3b	logical_deduction_five_objects	205	65.28	75.91	89.05
llama-3b	logical_deduction_five_objects	206	70.31	64.97	67.54
llama-3b	logical_deduction_five_objects	207	71.87	71.87	64.05
llama-3b	logical_deduction_five_objects	208	77.42	85.93	77.6
llama-3b	logical_deduction_five_objects	209	66.64	84.97	82.41
llama-3b	logical_deduction_five_objects	210	79.96	82.1	87.98
llama-3b	logical_deduction_five_objects	211	75.53	61.57	76.6
llama-3b	logical_deduction_five_objects	212	83.58	83.13	80.91
llama-3b	logical_deduction_five_objects	213	68.33	76.9	84.89
llama-3b	logical_deduction_five_objects	214	69.57	66.88	82.73
llama-3b	logical_deduction_five_objects	215	79.09	89.57	85.77
llama-3b	logical_deduction_five_objects	216	86.92	69.44	87.29
llama-3b	logical_deduction_five_objects	217	81.03	89.15	84.39
llama-3b	logical_deduction_five_objects	218	65.77	70.64	60.15
llama-3b	logical_deduction_five_objects	219	82.51	74.28	75.2
llama-3b	logical_deduction_five_objects	220	77.25	78.53	75.87
llama-3b	logical_deduction_five_objects	221	76.39	78.23	61.4
llama-3b	logical_deduction_five_objects	222	80.42	80.36	61.96
llama-3b	logical_deduction_five_objects	223	80.49	69.62	75.39
llama-3b	logical_deduction_five_objects	224	86.36	75.92	85.55
llama-3b	logical_deduction_five_objects	225	86.06	78.45	85.77
llama-3b	logical_deduction_five_objects	226	74.45	79.45	87.22
llama-3b	logical_deduction_five_objects	227	70.62	81.94	62.63
llama-3b	logical_deduction_five_objects	228	74.96	60.94	81.1
llama-3b	logical_deduction_five_objects	229	76.52	63.39	74.92
llama-3b	logical_deduction_five_objects	230	84.23	80.34	78.05
llama-3b	logical_deduction_five_objects	231	70.6	76.94	65.58
llama-3b	logical_deduction_five_objects	232	80.93	84.18	67.55
llama-3b	logical_deduction_five_objects	233	72.31	70.05	75.09
llama-3b	logical_deduction_five_objects	234	85.46	66.46	67.77
llama-3b	logical_deduction_five_objects	235	71.97	71.68	62.2
llama-3b	logical_deduction_five_objects	236	87.15	62.24	60.68
llama-3b	logical_deduction_five_objects	237	84.33	61.46	86.23
llama-3b	logical_deduction_five_objects	238	79.96	67.86	63.77
llama-3b	logical_deduction_five_objects	239	80.69	63.56	68.79
llama-3b	logical_deduction_five_objects	240	83.35	73.48	73.75
llama-3b	logical_deduction_five_objects	241	68.29	66.49	64.92
llama-3b	logical_deduction_five_objects	242	66.81	83.69	61
llama-3b	logical_deduction_five_objects	243	67.29	81.02	72.87
llama-3b	logical_deduction_five_objects	244	85.22	84.22	62.27
llama-3b	logical_deduction_five_objects	245	69.9	62.25	87.04
llama-3b	logical_deduction_five_objects	246	68.43	72.84	80.76
llama-3b	logical_deduction_five_objects	247	73.29	73.1	62.69
llama-3b	logical_deduction_five_objects	248	73.48	82.67	80.7
llama-3b	logical_deduction_five_objects	249	88.71	71.83	68.5
llama-3b	logical_deduction_seven_objects	0	89.48	64.19	67.13
llama-3b	logical_deduction_seven_objects	1	69.26	84.53	66.06
llama-3b	logical_deduction_seven_objects	2	73.67	65.61	78.41
llama-3b	logical_deduction_seven_objects	3	73.83	82.2	80.9
llama-3b	logical_deduction_seven_objects	4	68.02	73.32	88.76
llama-3b	logical_deduction_seven_objects	5	87.72	77.46	86.43
llama-3b	logical_deduction_seven_objects	6	82.28	88.98	62.04
llama-3b	logical_deduction_seven_objects	7	67.88	75.65	80.36
llama-3b	logical_deduction_seven_objects	8	80.45	75.45	84.84
llama-3b	logical_deduction_seven_objects	9	77.09	73.42	70.57
llama-3b	logical_deduction_seven_objects	10	73.22	89.81	66.85
llama-3b	logical_deduction_seven_objects	11	76.03	89.62	79.64
llama-3b	logical_deduction_seven_objects	12	69.94	73.46	79.52
llama-3b	logical_deduction_seven_objects	13	87.67	89.1	75.1
llama-3b	logical_deduction_seven_objects	14	73.98	63.03	79.71
llama-3b	logical_deduction_seven_objects	15	85.01	67.41	82.28
llama-3b	logical_deduction_seven_objects	16	67.68	72.86	64.34
llama-3b	logical_deduction_seven_objects	17	70.78	86.09	87.31
llama-3b	logical_deduction_seven_objects	18	86.53	67.08	74.16
llama-3b	logical_deduction_seven_objects	19	74.73	84.05	68.26
llama-3b	logical_deduction_seven_objects	20	77.41	64.23	86.36
llama-3b	logical_deduction_seven_objects	21	85.29	82.03	89.22
llama-3b	logical_deduction_seven_objects	22	79.26	74.56	65.83
llama-3b	logical_deduction_seven_objects	23	68.81	60.01	84.28
llama-3b	logical_deduction_seven_objects	24	69.44	83.62	88
llama-3b	logical_deduction_seven_objects	25	84.07	61.61	84.34
llama-3b	logical_deduction_seven_objects	26	69.08	76.29	84.46
llama-3b	logical_deduction_seven_objects	27	69.07	62.48	73.43
llama-3b	logical_deduction_seven_objects	28	89.67	83.19	72.95
llama-3b	logical_deduction_seven_objects	29	80.74	70.84	84.73
llama-3b	logical_deduction_seven_objects	30	80.81	60.84	65.19
llama-3b	logical_deduction_seven_objects	31	82.14	88.98	66.95
llama-3b	logical_deduction_seven_objects	32	71.38	83.85	77.56
llama-3b	logical_deduction_seven_objects	33	65.9	79.51	60.07
llama-3b	logical_deduction_seven_objects	34	65.44	61.16	66.88
llama-3b	logical_deduction_seven_objects	35	85.09	66.59	79.15
llama-3b	logical_deduction_seven_objects	36	83.86	77.37	84.78
llama-3b	logical_deduction_seven_objects	37	73.7	87.88	74.95
llama-3b	logical_deduction_seven_objects	38	82.54	76.31	83.17
llama-3b	logical_deduction_seven_objects	39	68.67	71.02	71.59
llama-3b	logical_deduction_seven_objects	40	88.72	70.55	61.4
llama-3b	logical_deduction_seven_objects	41	79.24	84.16	72.59
llama-3b	logical_deduction_seven_objects	42	79.4	83.28	77.98
llama-3b	logical_deduction_seven_objects	43	85.99	60.76	89.89
llama-3b	logical_deduction_seven_objects	44	82.66	64.11	83.72
llama-3b	logical_deduction_seven_objects	45	66.33	77.99	65.96
llama-3b	logical_deduction_seven_objects	46	74.07	83.77	85.94
llama-3b	logical_deduction_seven_objects	47	77.76	73.5	76.67
llama-3b	logical_deduction_seven_objects	48	72.77	78.41	73.16
llama-3b	logical_deduction_seven_objects	49	72.45	75.93	60.12
llama-3b	logical_deduction_seven_objects	50	67.36	81.74	76.93
llama-3b	logical_deduction_seven_objects	51	70.14	72.63	65.96
llama-3b	logical_deduction_seven_objects	52	71.4	75.44	62.02
llama-3b	logical_deduction_seven_objects	53	72.43	86.19	80.08
llama-3b	logical_deduction_seven_objects	54	66.03	65.61	89.02
llama-3b	logical_deduction_seven_objects	55	78.35	74.94	62.67
llama-3b	logical_deduction_seven_objects	56	85.78	73.58	67.33
llama-3b	logical_deduction_seven_objects	57	67.49	63.53	74.63
llama-3b	logical_deduction_seven_objects	58	88.49	83.89	73.49
llama-3b	logical_deduction_seven_objects	59	86.71	81.09	87.43
llama-3b	logical_deduction_seven_objects	60	79.68	63.83	66.15
llama-3b	logical_deduction_seven_objects	61	66.27	76.14	60.48
[truncated: 41,828 more rows]

## Sheet: Model vs. Generate Model and Da
model	task	jina-score	bleu-score	bert-score
RLP	causal-judgement	22.55	20.7	20.56
RLP	date-understanding	22.82	19.73	19.78
RLP	disambiguation-qa	22.36	19.68	20.31
RLP	dyck-languages	22.44	19.96	19.79
RLP	formal-fallacies	22.47	20.5	19.82
RLP	geometric-shapes	22.46	20.07	20.04
RLP	hyperbaton	22.64	20.38	20.24
RLP	logical-five-objects	22.41	20.22	20.25
RLP	logical-seven-objects	22.36	19.5	19.69
RLP	logical-three-objects	22.62	20.13	20.14
RLP	movie-recommendation	22.38	19.98	20.41
RLP	multistep-arithmetic-two	22.35	19.85	20.07
RLP	navigate	22.16	20.19	19.65
RLP	object-counting	22.15	20.04	19.7
RLP	penguins-in-a-table	21.77	19.74	19.66
RLP	reasoning-colored-objects	22.39	19.4	20.1
RLP	ruin-names	22.38	19.77	19.74
RLP	salient-error-detection	22.89	19.63	19.79
RLP	snarks	22.53	20.81	19.92
RLP	sports-understanding	22.69	19.8	19.97
RLP	temporal-sequences	22.42	20.37	20.18
RLP	tracking-five-objects	22.46	20.03	19.72
RLP	tracking-seven-objects	22.57	20.24	19.72
RLP	tracking-three-objects	22.52	20.13	20.17
RLP	web-of-lies	22.22	20.05	19.6
RLP	word-sorting	22.61	20.53	20.01
llama-1b	causal-judgement	20.29	13.57	15.3
llama-1b	date-understanding	20.52	15.21	15.06
llama-1b	disambiguation-qa	20.31	14.61	14.45
llama-1b	dyck-languages	20.22	15.46	14.8
llama-1b	formal-fallacies	19.78	14.63	14.62
llama-1b	geometric-shapes	19.98	15.59	15.48
llama-1b	hyperbaton	19.83	15.2	14.79
llama-1b	logical-five-objects	20.6	16.04	15.37
llama-1b	logical-seven-objects	19.53	14.87	15.28
llama-1b	logical-three-objects	19.87	15.2	15.62
llama-1b	movie-recommendation	20.12	15.94	15.9
llama-1b	multistep-arithmetic-two	20.62	14.28	14.26
llama-1b	navigate	20.48	13.99	15.89
llama-1b	object-counting	20.18	14.67	14.93
llama-1b	penguins-in-a-table	19.99	14.66	15.27
llama-1b	reasoning-colored-objects	20.28	15.32	14.55
llama-1b	ruin-names	19.99	14.04	15.05
llama-1b	salient-error-detection	20.16	14.94	14.29
llama-1b	snarks	19.93	14.65	14.82
llama-1b	sports-understanding	19.79	15.5	14.33
llama-1b	temporal-sequences	19.92	14.97	15.2
llama-1b	tracking-five-objects	20.29	15.82	15.82
llama-1b	tracking-seven-objects	19.88	14.62	14.72
llama-1b	tracking-three-objects	20.67	15.03	14.52
llama-1b	web-of-lies	20.29	14.68	15.2
llama-1b	word-sorting	19.9	15.74	15.47
llama-3b	causal-judgement	19.54	15.52	14.76
llama-3b	date-understanding	19.71	15.19	15.81
llama-3b	disambiguation-qa	20.53	14.74	14.81
llama-3b	dyck-languages	19.76	14.93	15.09
llama-3b	formal-fallacies	19.87	14.66	13.95
llama-3b	geometric-shapes	20.46	15.3	14.61
llama-3b	hyperbaton	19.51	15.66	15.2
llama-3b	logical-five-objects	20.1	14.76	14.67
llama-3b	logical-seven-objects	20.6	15.13	15.89
llama-3b	logical-three-objects	20.22	15.02	13.97
llama-3b	movie-recommendation	19.52	15.43	15.71
llama-3b	multistep-arithmetic-two	19.91	15.3	14.89
llama-3b	navigate	20.52	15.44	15.63
llama-3b	object-counting	20.35	15.54	15.94
llama-3b	penguins-in-a-table	19.28	15.29	13.62
llama-3b	reasoning-colored-objects	19.62	15.51	14.3
llama-3b	ruin-names	19.89	15.45	14.77
llama-3b	salient-error-detection	20.48	15.19	15.45
llama-3b	snarks	20.33	15.07	14.91
llama-3b	sports-understanding	20.44	15.09	14.34
llama-3b	temporal-sequences	20.14	14.55	15.06
llama-3b	tracking-five-objects	20	14.06	15.54
llama-3b	tracking-seven-objects	19.81	15.35	15.04
llama-3b	tracking-three-objects	20.28	14.82	14.27
llama-3b	web-of-lies	19.57	14.86	15.71
llama-3b	word-sorting	20.6	15.2	14.79
llama-8b	causal-judgement	20.46	14.7	15.18
llama-8b	date-understanding	19.49	14.25	15.69
llama-8b	disambiguation-qa	20.63	15.69	14.95
llama-8b	dyck-languages	20.41	15.1	14.95
llama-8b	formal-fallacies	19.83	15.47	15.38
llama-8b	geometric-shapes	19.7	14.52	15.85
llama-8b	hyperbaton	19.96	15.28	14.83
llama-8b	logical-five-objects	20.39	15.01	14.9
llama-8b	logical-seven-objects	19.74	15.29	14.31
llama-8b	logical-three-objects	19.58	15.73	14.82
llama-8b	movie-recommendation	20.45	15.02	15.58
llama-8b	multistep-arithmetic-two	19.22	14.06	14.87
llama-8b	navigate	20.31	14.13	14.61
llama-8b	object-counting	19.6	14.77	14.04
llama-8b	penguins-in-a-table	21.21	14.2	15
llama-8b	reasoning-colored-objects	20.39	14.11	14.72
llama-8b	ruin-names	21.18	14.52	14.44
llama-8b	salient-error-detection	19.66	15.5	14.07
llama-8b	snarks	19.93	14.62	14.48
llama-8b	sports-understanding	19.04	15.5	14.79
llama-8b	temporal-sequences	19.34	15.19	15.18
llama-8b	tracking-five-objects	19.89	15.06	14.28
llama-8b	tracking-seven-objects	19.16	14.87	14.15
llama-8b	tracking-three-objects	20.3	15.06	15.24
llama-8b	web-of-lies	19.79	14.77	14.48
llama-8b	word-sorting	20.1	15.36	15.4
yi-34B	causal-judgement	20.02	15.55	14.68
yi-34B	date-understanding	20.2	15.17	14.96
yi-34B	disambiguation-qa	19.57	15.8	14.9
yi-34B	dyck-languages	19.9	15.08	15.21
yi-34B	formal-fallacies	20.39	15.26	15.69
yi-34B	geometric-shapes	20.04	15	15.16
yi-34B	hyperbaton	19.46	14.47	14.68
yi-34B	logical-five-objects	20.39	14.92	14.62
yi-34B	logical-seven-objects	19.64	16.04	15.63
yi-34B	logical-three-objects	19.84	14.97	13.82
yi-34B	movie-recommendation	19.84	15.27	15.38
yi-34B	multistep-arithmetic-two	20.17	14.95	14.73
yi-34B	navigate	19.86	15.16	14.96
yi-34B	object-counting	19.97	14.65	14.47
yi-34B	penguins-in-a-table	19.56	15.6	15.87
yi-34B	reasoning-colored-objects	19.86	15.03	16.3
yi-34B	ruin-names	20.01	14.22	14.76
yi-34B	salient-error-detection	19.89	15.8	14.53
yi-34B	snarks	19.8	14.91	15.78
yi-34B	sports-understanding	19.91	15	15.78
yi-34B	temporal-sequences	20.01	15.73	15.15
yi-34B	tracking-five-objects	20.1	15.06	15.89
yi-34B	tracking-seven-objects	20.18	14.96	16.11
yi-34B	tracking-three-objects	19.48	15.64	15
yi-34B	web-of-lies	19.39	14.66	16.09
yi-34B	word-sorting	19.17	14.56	15.01
qwen-turbo	causal-judgement	19.96	13.98	15.1
qwen-turbo	date-understanding	20.1	14.62	14.66
qwen-turbo	disambiguation-qa	20.58	15.1	14.48
qwen-turbo	dyck-languages	20.94	14.83	15.89
qwen-turbo	formal-fallacies	20.27	14.58	14.48
qwen-turbo	geometric-shapes	19.82	14.83	14.45
qwen-turbo	hyperbaton	20.06	15.24	14.91
qwen-turbo	logical-five-objects	20.25	15.04	14.2
qwen-turbo	logical-seven-objects	20.17	15.3	14.9
qwen-turbo	logical-three-objects	20.11	14.92	15.44
qwen-turbo	movie-recommendation	19.59	14.33	16.2
qwen-turbo	multistep-arithmetic-two	20.46	15.26	15.42
qwen-turbo	navigate	20.19	14.29	15.39
qwen-turbo	object-counting	19.74	15.83	15.2
qwen-turbo	penguins-in-a-table	19.92	15.98	14.66
qwen-turbo	reasoning-colored-objects	20.17	15.22	14.05
qwen-turbo	ruin-names	20.54	15.38	15.27
qwen-turbo	salient-error-detection	20.06	15.1	15.15
qwen-turbo	snarks	20.05	15.5	15.43
qwen-turbo	sports-understanding	20.18	15.74	15.69
qwen-turbo	temporal-sequences	19.61	14.56	14.57
qwen-turbo	tracking-five-objects	20.12	14.99	15.16
qwen-turbo	tracking-seven-objects	19.92	15.58	15.29
qwen-turbo	tracking-three-objects	20.33	15.01	15.74
qwen-turbo	web-of-lies	19.9	14.68	15.36
qwen-turbo	word-sorting	19.88	14.71	14.49
qwen-plus	causal-judgement	19.7	14.01	15.13
qwen-plus	date-understanding	19.68	14.98	14.92
qwen-plus	disambiguation-qa	20.83	15.73	15.28
qwen-plus	dyck-languages	19.64	14.4	13.99
qwen-plus	formal-fallacies	19.93	15.33	14.51
qwen-plus	geometric-shapes	19.71	14.96	14.45
qwen-plus	hyperbaton	20.03	15.6	15.42
qwen-plus	logical-five-objects	20.28	15.04	15.42
qwen-plus	logical-seven-objects	20.22	15.91	15.06
qwen-plus	logical-three-objects	19.66	14.19	15.04
qwen-plus	movie-recommendation	20.16	15.19	15.13
qwen-plus	multistep-arithmetic-two	19.93	15.29	14.89
qwen-plus	navigate	19.83	15.02	15.38
qwen-plus	object-counting	19.63	15.36	15.02
qwen-plus	penguins-in-a-table	19.36	15.9	15.19
qwen-plus	reasoning-colored-objects	19.6	15.94	15.03
qwen-plus	ruin-names	19.64	14.43	15.11
qwen-plus	salient-error-detection	20.15	14.7	15.43
qwen-plus	snarks	19.48	14.1	15.31
qwen-plus	sports-understanding	20.18	15.7	14.72
qwen-plus	temporal-sequences	19.47	15.28	15.33
qwen-plus	tracking-five-objects	20.44	14.65	14.84
qwen-plus	tracking-seven-objects	20.15	14.72	15.27
qwen-plus	tracking-three-objects	20.33	15.47	14.43
qwen-plus	web-of-lies	20.07	14.53	14.68
qwen-plus	word-sorting	19.73	14.75	14.82

## Sheet: Comparison of jina similarity o
model	task	jina-score	bleu-score	bert-score
RLP	causal_judgement.json	22.55	20.7	20.56
RLP	date_understanding.json	22.82	19.73	19.78
RLP	disambiguation_qa.json	22.36	19.68	20.31
RLP	dyck_languages.json	22.44	19.96	19.79
RLP	formal_fallacies.json	22.47	20.5	19.82
RLP	geometric_shapes.json	22.46	20.07	20.04
RLP	hyperbaton.json	22.64	20.38	20.24
RLP	logical_deduction_five_objects.json	22.41	20.22	20.25
RLP	logical_deduction_seven_objects.json	22.36	19.5	19.69
RLP	logical_deduction_three_objects.json	22.62	20.13	20.14
RLP	movie_recommendation.json	22.38	19.98	20.41
RLP	multistep_arithmetic_two.json	22.35	19.85	20.07
RLP	navigate.json	22.16	20.19	19.65
RLP	object_counting.json	22.15	20.04	19.7
RLP	penguins_in_a_table.json	21.77	19.74	19.66
RLP	reasoning_about_colored_objects.json	22.39	19.4	20.1
RLP	ruin_names.json	22.38	19.77	19.74
RLP	salient_translation_error_detection.json	22.89	19.63	19.79
RLP	snarks.json	22.53	20.81	19.92
RLP	sports_understanding.json	22.69	19.8	19.97
RLP	temporal_sequences.json	22.42	20.37	20.18
RLP	tracking_shuffled_objects_five_objects.json	22.46	20.03	19.72
RLP	tracking_shuffled_objects_seven_objects.json	22.57	20.24	19.72
RLP	tracking_shuffled_objects_three_objects.json	22.52	20.13	20.17
RLP	web_of_lies.json	22.22	20.05	19.6
RLP	word_sorting.json	22.61	20.53	20.01
llama-1b	causal_judgement.json	20.29	13.57	15.3
llama-1b	date_understanding.json	20.52	15.21	15.06
llama-1b	disambiguation_qa.json	20.31	14.61	14.45
llama-1b	dyck_languages.json	20.22	15.46	14.8
llama-1b	formal_fallacies.json	19.78	14.63	14.62
llama-1b	geometric_shapes.json	19.98	15.59	15.48
llama-1b	hyperbaton.json	19.83	15.2	14.79
llama-1b	logical_deduction_five_objects.json	20.6	16.04	15.37
llama-1b	logical_deduction_seven_objects.json	19.53	14.87	15.28
llama-1b	logical_deduction_three_objects.json	19.87	15.2	15.62
llama-1b	movie_recommendation.json	20.12	15.94	15.9
llama-1b	multistep_arithmetic_two.json	20.62	14.28	14.26
llama-1b	navigate.json	20.48	13.99	15.89
llama-1b	object_counting.json	20.18	14.67	14.93
llama-1b	penguins_in_a_table.json	19.99	14.66	15.27
llama-1b	reasoning_about_colored_objects.json	20.28	15.32	14.55
llama-1b	ruin_names.json	19.99	14.04	15.05
llama-1b	salient_translation_error_detection.json	20.16	14.94	14.29
llama-1b	snarks.json	19.93	14.65	14.82
llama-1b	sports_understanding.json	19.79	15.5	14.33
llama-1b	temporal_sequences.json	19.92	14.97	15.2
llama-1b	tracking_shuffled_objects_five_objects.json	20.29	15.82	15.82
llama-1b	tracking_shuffled_objects_seven_objects.json	19.88	14.62	14.72
llama-1b	tracking_shuffled_objects_three_objects.json	20.67	15.03	14.52
llama-1b	web_of_lies.json	20.29	14.68	15.2
llama-1b	word_sorting.json	19.9	15.74	15.47

## Sheet: Comparison of detailed data cor
model	task_gen	question	jina-score	bleu-score	bert-score
RLP	COTs Generation	causal_judgement.json	22.89	19.99	19.84
RLP	COTs Generation	date_understanding.json	22.45	19.37	20.04
RLP	COTs Generation	disambiguation_qa.json	22.68	20.73	19.68
RLP	COTs Generation	dyck_languages.json	22.65	19.95	19.85
RLP	COTs Generation	formal_fallacies.json	22.45	19.65	20.66
RLP	COTs Generation	geometric_shapes.json	22.17	20.18	20.95
RLP	COTs Generation	hyperbaton.json	22.51	19.73	20.2
RLP	COTs Generation	logical_deduction_five_objects.json	22.14	20.35	19.91
RLP	COTs Generation	logical_deduction_seven_objects.json	22.42	20.07	19.14
RLP	COTs Generation	logical_deduction_three_objects.json	22.33	19.73	20.23
RLP	COTs Generation	movie_recommendation.json	22.78	20.27	19.91
RLP	COTs Generation	multistep_arithmetic_two.json	22.58	20.49	20.03
RLP	COTs Generation	navigate.json	22.87	20.39	19.88
RLP	COTs Generation	object_counting.json	22.34	20.72	19.45
RLP	COTs Generation	penguins_in_a_table.json	22.79	20.81	19.29
RLP	COTs Generation	reasoning_about_colored_objects.json	22.53	20.03	20.25
RLP	COTs Generation	ruin_names.json	22.44	19.37	18.98
RLP	COTs Generation	salient_translation_error_detection.json	22.53	20.1	19.75
RLP	COTs Generation	snarks.json	22.54	20.57	19.73
RLP	COTs Generation	sports_understanding.json	22.91	20.49	20.41
RLP	COTs Generation	temporal_sequences.json	22.78	19.7	19.51
RLP	COTs Generation	tracking_shuffled_objects_five_objects.json	22.4	20.16	20.53
RLP	COTs Generation	tracking_shuffled_objects_seven_objects.json	22.33	20.6	20.21
RLP	COTs Generation	tracking_shuffled_objects_three_objects.json	22.86	20.17	19.35
RLP	COTs Generation	web_of_lies.json	22.44	20.97	20.33
RLP	COTs Generation	word_sorting.json	22.65	19.68	19.99
llama-1b	COTs Generation	causal_judgement.json	19.92	14.24	14.47
llama-1b	COTs Generation	date_understanding.json	20.19	14.78	15.67
llama-1b	COTs Generation	disambiguation_qa.json	19.74	15.13	15.33
llama-1b	COTs Generation	dyck_languages.json	19.69	15.09	15.35
llama-1b	COTs Generation	formal_fallacies.json	19.98	14.46	15.39
llama-1b	COTs Generation	geometric_shapes.json	19.31	15.07	13.52
llama-1b	COTs Generation	hyperbaton.json	19.64	14.78	14.8
llama-1b	COTs Generation	logical_deduction_five_objects.json	19.72	15.26	15.2
llama-1b	COTs Generation	logical_deduction_seven_objects.json	19.69	15.09	14.42
llama-1b	COTs Generation	logical_deduction_three_objects.json	20.07	15.24	14.63
llama-1b	COTs Generation	movie_recommendation.json	19.78	15.38	15.12
llama-1b	COTs Generation	multistep_arithmetic_two.json	19.77	15.09	15.25
llama-1b	COTs Generation	navigate.json	19.96	13.93	14.08
llama-1b	COTs Generation	object_counting.json	20.06	14.95	14.35
llama-1b	COTs Generation	penguins_in_a_table.json	19.69	15.97	15.25
llama-1b	COTs Generation	reasoning_about_colored_objects.json	20.25	15.44	14.71
llama-1b	COTs Generation	ruin_names.json	19.34	15.2	14.55
llama-1b	COTs Generation	salient_translation_error_detection.json	20.42	15.3	14.86
llama-1b	COTs Generation	snarks.json	20.01	14.99	14.48
llama-1b	COTs Generation	sports_understanding.json	20.53	15.64	14.53
llama-1b	COTs Generation	temporal_sequences.json	20.03	14.63	15.56
llama-1b	COTs Generation	tracking_shuffled_objects_five_objects.json	20.25	16.08	14.92
llama-1b	COTs Generation	tracking_shuffled_objects_seven_objects.json	20.62	15.08	15.03
llama-1b	COTs Generation	tracking_shuffled_objects_three_objects.json	19.97	14.6	15.18
llama-1b	COTs Generation	web_of_lies.json	19.7	14.81	14.42
llama-1b	COTs Generation	word_sorting.json	19.96	15.52	15.1
llama-3b	COTs Generation	causal_judgement.json	20.7	14.99	16.59
llama-3b	COTs Generation	date_understanding.json	20.03	15.1	15.03
llama-3b	COTs Generation	disambiguation_qa.json	20.13	14.19	15.06
llama-3b	COTs Generation	dyck_languages.json	19.8	16.31	15.58
llama-3b	COTs Generation	formal_fallacies.json	19.23	14.91	15.12
llama-3b	COTs Generation	geometric_shapes.json	20.28	13.74	14.98
llama-3b	COTs Generation	hyperbaton.json	19.96	15.4	15.65
llama-3b	COTs Generation	logical_deduction_five_objects.json	20.03	15.28	14.15
llama-3b	COTs Generation	logical_deduction_seven_objects.json	19.52	15.28	14.29
llama-3b	COTs Generation	logical_deduction_three_objects.json	19.42	14.58	14.51
llama-3b	COTs Generation	movie_recommendation.json	20.66	15.43	15.39
llama-3b	COTs Generation	multistep_arithmetic_two.json	20.18	15.07	14.45
llama-3b	COTs Generation	navigate.json	20.16	14.98	14.67
llama-3b	COTs Generation	object_counting.json	19.91	14.61	15.37
llama-3b	COTs Generation	penguins_in_a_table.json	20.17	14.46	15.29
llama-3b	COTs Generation	reasoning_about_colored_objects.json	19.97	14.97	15.45
llama-3b	COTs Generation	ruin_names.json	20.33	14.89	14.99
llama-3b	COTs Generation	salient_translation_error_detection.json	20.38	14.44	15.3
llama-3b	COTs Generation	snarks.json	20.07	16.1	15.53
llama-3b	COTs Generation	sports_understanding.json	20.49	15.02	15.12
llama-3b	COTs Generation	temporal_sequences.json	19.47	14.78	14.8
llama-3b	COTs Generation	tracking_shuffled_objects_five_objects.json	19.93	14.73	14.5
llama-3b	COTs Generation	tracking_shuffled_objects_seven_objects.json	19.05	15.05	15.56
llama-3b	COTs Generation	tracking_shuffled_objects_three_objects.json	20.19	15.13	14.83
llama-3b	COTs Generation	web_of_lies.json	19.62	15.36	14.94
llama-3b	COTs Generation	word_sorting.json	19.22	15.34	15.9
llama-8b	COTs Generation	causal_judgement.json	19.87	14.86	15.79
llama-8b	COTs Generation	date_understanding.json	20.31	14.62	14.73
llama-8b	COTs Generation	disambiguation_qa.json	19.78	15.18	15.26
llama-8b	COTs Generation	dyck_languages.json	19.7	16.13	13.65
llama-8b	COTs Generation	formal_fallacies.json	19.48	15.48	14.62
llama-8b	COTs Generation	geometric_shapes.json	20.46	15.24	14.61
llama-8b	COTs Generation	hyperbaton.json	19.8	15.15	15.27
llama-8b	COTs Generation	logical_deduction_five_objects.json	20.13	14.56	13.88
llama-8b	COTs Generation	logical_deduction_seven_objects.json	19.19	15.84	15.66
llama-8b	COTs Generation	logical_deduction_three_objects.json	20.63	15.6	15.11
llama-8b	COTs Generation	movie_recommendation.json	19.67	15.37	15.11
llama-8b	COTs Generation	multistep_arithmetic_two.json	19.41	15.33	14.81
llama-8b	COTs Generation	navigate.json	20.58	14.8	15.15
llama-8b	COTs Generation	object_counting.json	20.4	15.67	15.53
llama-8b	COTs Generation	penguins_in_a_table.json	20.02	14.4	14.96
llama-8b	COTs Generation	reasoning_about_colored_objects.json	19.33	15.37	15.29
llama-8b	COTs Generation	ruin_names.json	19.87	15	15.46
llama-8b	COTs Generation	salient_translation_error_detection.json	20.51	15.03	14.28
llama-8b	COTs Generation	snarks.json	20.36	15.6	15.06
llama-8b	COTs Generation	sports_understanding.json	19.89	15.02	15
llama-8b	COTs Generation	temporal_sequences.json	20.59	15.78	16.03
llama-8b	COTs Generation	tracking_shuffled_objects_five_objects.json	19.93	14.45	14.92
llama-8b	COTs Generation	tracking_shuffled_objects_seven_objects.json	19.98	15.87	14.38
llama-8b	COTs Generation	tracking_shuffled_objects_three_objects.json	20.37	14.39	16.04
llama-8b	COTs Generation	web_of_lies.json	20.37	15.83	14.97
llama-8b	COTs Generation	word_sorting.json	19.9	15.19	15.45
yi-34B	COTs Generation	causal_judgement.json	19.44	15.6	14.4
yi-34B	COTs Generation	date_understanding.json	19.63	15.39	15.07
yi-34B	COTs Generation	disambiguation_qa.json	20.36	15.55	14.9
yi-34B	COTs Generation	dyck_languages.json	20.02	14.16	14.78
yi-34B	COTs Generation	formal_fallacies.json	20.35	14.48	14.72
yi-34B	COTs Generation	geometric_shapes.json	19.02	14.24	15.48
yi-34B	COTs Generation	hyperbaton.json	20.02	15.91	15.34
yi-34B	COTs Generation	logical_deduction_five_objects.json	20.04	14.63	14.21
yi-34B	COTs Generation	logical_deduction_seven_objects.json	20.2	15.84	15.09
yi-34B	COTs Generation	logical_deduction_three_objects.json	19.81	14.37	14.26
yi-34B	COTs Generation	movie_recommendation.json	19.67	14.37	15.64
yi-34B	COTs Generation	multistep_arithmetic_two.json	19.77	15.56	15.41
yi-34B	COTs Generation	navigate.json	20.47	14.84	14.58
yi-34B	COTs Generation	object_counting.json	20.03	14.31	15.16
yi-34B	COTs Generation	penguins_in_a_table.json	19.72	14.42	14.26
yi-34B	COTs Generation	reasoning_about_colored_objects.json	20.15	14.87	14.82
yi-34B	COTs Generation	ruin_names.json	20.33	14.35	15.11
yi-34B	COTs Generation	salient_translation_error_detection.json	20.56	14.57	15.58
yi-34B	COTs Generation	snarks.json	20.21	15.13	15.17
yi-34B	COTs Generation	sports_understanding.json	19.76	15.59	14.95
yi-34B	COTs Generation	temporal_sequences.json	20.17	15.25	14.67
yi-34B	COTs Generation	tracking_shuffled_objects_five_objects.json	20.33	15.38	15.07
yi-34B	COTs Generation	tracking_shuffled_objects_seven_objects.json	19.99	14.99	14.66
yi-34B	COTs Generation	tracking_shuffled_objects_three_objects.json	20.35	14.24	15.37
yi-34B	COTs Generation	web_of_lies.json	20.05	14.01	14.91
yi-34B	COTs Generation	word_sorting.json	19.94	15.97	14.34
qwen-turbo	COTs Generation	causal_judgement.json	19.51	15.21	15.68
qwen-turbo	COTs Generation	date_understanding.json	19.68	15.24	14.55
qwen-turbo	COTs Generation	disambiguation_qa.json	19.8	16.49	15.99
qwen-turbo	COTs Generation	dyck_languages.json	19.83	15.33	14.34
qwen-turbo	COTs Generation	formal_fallacies.json	20.15	15.52	15.74
qwen-turbo	COTs Generation	geometric_shapes.json	19.77	15.56	15.53
qwen-turbo	COTs Generation	hyperbaton.json	19.81	14.15	15.23
qwen-turbo	COTs Generation	logical_deduction_five_objects.json	20.25	14.35	15.06
qwen-turbo	COTs Generation	logical_deduction_seven_objects.json	20.17	15.28	14.63
qwen-turbo	COTs Generation	logical_deduction_three_objects.json	19.28	15.67	14.75
qwen-turbo	COTs Generation	movie_recommendation.json	19.81	15.19	15.59
qwen-turbo	COTs Generation	multistep_arithmetic_two.json	20.26	15.53	14.78
qwen-turbo	COTs Generation	navigate.json	20.57	14.35	15.39
qwen-turbo	COTs Generation	object_counting.json	19.61	15.8	14.71
qwen-turbo	COTs Generation	penguins_in_a_table.json	19.84	14.95	15.15
qwen-turbo	COTs Generation	reasoning_about_colored_objects.json	20.03	14.44	15.89
qwen-turbo	COTs Generation	ruin_names.json	20.51	14.6	14.65
qwen-turbo	COTs Generation	salient_translation_error_detection.json	19.63	14.13	15.09
qwen-turbo	COTs Generation	snarks.json	20.04	15.96	14.03
qwen-turbo	COTs Generation	sports_understanding.json	20.16	15.27	14.95
qwen-turbo	COTs Generation	temporal_sequences.json	20.37	15.23	15.28
qwen-turbo	COTs Generation	tracking_shuffled_objects_five_objects.json	19.6	14.88	14.8
qwen-turbo	COTs Generation	tracking_shuffled_objects_seven_objects.json	20.28	15.85	15.12
qwen-turbo	COTs Generation	tracking_shuffled_objects_three_objects.json	19.83	14.77	14.87
qwen-turbo	COTs Generation	web_of_lies.json	19.94	15.51	15.21
qwen-turbo	COTs Generation	word_sorting.json	20.38	15.3	14.8
qwen-plus	COTs Generation	causal_judgement.json	20.65	13.44	14.6
qwen-plus	COTs Generation	date_understanding.json	20.52	14.75	15.3
qwen-plus	COTs Generation	disambiguation_qa.json	19.83	15.93	15.43
qwen-plus	COTs Generation	dyck_languages.json	19.68	15.45	14.35
qwen-plus	COTs Generation	formal_fallacies.json	20.11	15.2	15.65
qwen-plus	COTs Generation	geometric_shapes.json	20.64	14.65	14.95
qwen-plus	COTs Generation	hyperbaton.json	20.37	14.46	14.98
qwen-plus	COTs Generation	logical_deduction_five_objects.json	19.99	14.75	16.15
qwen-plus	COTs Generation	logical_deduction_seven_objects.json	20.55	15.95	15.49
qwen-plus	COTs Generation	logical_deduction_three_objects.json	20.05	14.79	15.5
qwen-plus	COTs Generation	movie_recommendation.json	19.79	14.45	14.99
qwen-plus	COTs Generation	multistep_arithmetic_two.json	19.9	15.55	14.79
qwen-plus	COTs Generation	navigate.json	19.98	14.84	14.23
qwen-plus	COTs Generation	object_counting.json	20.22	15.14	15.24
qwen-plus	COTs Generation	penguins_in_a_table.json	19.73	15.19	15.16
qwen-plus	COTs Generation	reasoning_about_colored_objects.json	20.08	14.73	14.61
qwen-plus	COTs Generation	ruin_names.json	19.83	14.57	15.62
qwen-plus	COTs Generation	salient_translation_error_detection.json	20.41	15.41	14.47
qwen-plus	COTs Generation	snarks.json	19.87	15	14.41
qwen-plus	COTs Generation	sports_understanding.json	20.22	14.68	14.33
qwen-plus	COTs Generation	temporal_sequences.json	20.46	13.28	14.45
qwen-plus	COTs Generation	tracking_shuffled_objects_five_objects.json	20.05	15.84	14.72
qwen-plus	COTs Generation	tracking_shuffled_objects_seven_objects.json	19.74	14.56	15.84
qwen-plus	COTs Generation	tracking_shuffled_objects_three_objects.json	19.98	15.11	14.87
qwen-plus	COTs Generation	web_of_lies.json	19.23	14.58	15.64
qwen-plus	COTs Generation	word_sorting.json	20.76	13.96	14.49
RLP	Cases Generation	causal_judgement.json	22.16	20.18	19.96
RLP	Cases Generation	date_understanding.json	22.95	20.29	19.65
RLP	Cases Generation	disambiguation_qa.json	22.35	19.76	20.5
RLP	Cases Generation	dyck_languages.json	22.24	19.54	19.75
RLP	Cases Generation	formal_fallacies.json	22.24	20.57	19.67
RLP	Cases Generation	geometric_shapes.json	22.2	20.33	19.95
RLP	Cases Generation	hyperbaton.json	22.14	19.44	19.81
RLP	Cases Generation	logical_deduction_five_objects.json	22.15	20.08	19.79
RLP	Cases Generation	logical_deduction_seven_objects.json	22.4	20.36	19.72
RLP	Cases Generation	logical_deduction_three_objects.json	21.94	19.55	20.62
RLP	Cases Generation	movie_recommendation.json	22.62	19.88	20.25
RLP	Cases Generation	multistep_arithmetic_two.json	22.63	19.36	20.03
RLP	Cases Generation	navigate.json	23.07	20.44	20.16
RLP	Cases Generation	object_counting.json	22.28	19.86	20.45
RLP	Cases Generation	penguins_in_a_table.json	22.32	20.62	19.42
RLP	Cases Generation	reasoning_about_colored_objects.json	22.15	20.1	20.19
RLP	Cases Generation	ruin_names.json	22.62	19.43	20.32
RLP	Cases Generation	salient_translation_error_detection.json	22.57	19.58	19.41
RLP	Cases Generation	snarks.json	22.13	19.59	19.97
RLP	Cases Generation	sports_understanding.json	22.16	19.62	19.89
RLP	Cases Generation	temporal_sequences.json	22.34	20.33	20.22
RLP	Cases Generation	tracking_shuffled_objects_five_objects.json	22.39	19.86	20.1
RLP	Cases Generation	tracking_shuffled_objects_seven_objects.json	22.23	20.45	20.1
RLP	Cases Generation	tracking_shuffled_objects_three_objects.json	22.5	20.31	20.21
RLP	Cases Generation	web_of_lies.json	22.55	20.23	20.64
RLP	Cases Generation	word_sorting.json	22.16	20.09	19.9
llama-1b	Cases Generation	causal_judgement.json	19.74	14.29	14.65
llama-1b	Cases Generation	date_understanding.json	19.55	16.01	15.05
llama-1b	Cases Generation	disambiguation_qa.json	19.81	14.62	15.12
llama-1b	Cases Generation	dyck_languages.json	19.65	14.75	15.27
llama-1b	Cases Generation	formal_fallacies.json	20.65	15.2	15.54
llama-1b	Cases Generation	geometric_shapes.json	19.96	13.8	15.5
llama-1b	Cases Generation	hyperbaton.json	20.38	14.07	15.49
llama-1b	Cases Generation	logical_deduction_five_objects.json	20.59	14.24	15.41
llama-1b	Cases Generation	logical_deduction_seven_objects.json	19.76	15.13	15.51
llama-1b	Cases Generation	logical_deduction_three_objects.json	19.79	15.3	16.33
llama-1b	Cases Generation	movie_recommendation.json	19.93	15.25	14.91
llama-1b	Cases Generation	multistep_arithmetic_two.json	20.28	15.05	15.5
llama-1b	Cases Generation	navigate.json	20.39	15.56	13.86
llama-1b	Cases Generation	object_counting.json	20.08	14.57	15.01
llama-1b	Cases Generation	penguins_in_a_table.json	20.24	13.79	14.74
llama-1b	Cases Generation	reasoning_about_colored_objects.json	19.46	14.88	14.82
llama-1b	Cases Generation	ruin_names.json	20.03	15.37	14.43
llama-1b	Cases Generation	salient_translation_error_detection.json	20.41	14.87	15.18
llama-1b	Cases Generation	snarks.json	21.09	14.85	13.82
llama-1b	Cases Generation	sports_understanding.json	19.61	15.08	14.75
llama-1b	Cases Generation	temporal_sequences.json	19.66	15.03	15.8
llama-1b	Cases Generation	tracking_shuffled_objects_five_objects.json	20.01	14.01	15.33
llama-1b	Cases Generation	tracking_shuffled_objects_seven_objects.json	19.81	15.33	15
llama-1b	Cases Generation	tracking_shuffled_objects_three_objects.json	19.22	15.33	14.36
llama-1b	Cases Generation	web_of_lies.json	20.17	15.2	15.96
llama-1b	Cases Generation	word_sorting.json	20.16	15.34	13.97
llama-3b	Cases Generation	causal_judgement.json	20.33	14.32	15.64
llama-3b	Cases Generation	date_understanding.json	19.9	14.49	15.07
llama-3b	Cases Generation	disambiguation_qa.json	19.57	15.47	15.24
llama-3b	Cases Generation	dyck_languages.json	20.37	15.99	15.12
llama-3b	Cases Generation	formal_fallacies.json	19.29	14.58	14.01
llama-3b	Cases Generation	geometric_shapes.json	20.34	14.67	14.32
llama-3b	Cases Generation	hyperbaton.json	20.34	15.55	15.08
llama-3b	Cases Generation	logical_deduction_five_objects.json	20.32	14.71	15.22
llama-3b	Cases Generation	logical_deduction_seven_objects.json	20.43	15.06	14
llama-3b	Cases Generation	logical_deduction_three_objects.json	19.62	14.07	15.05
llama-3b	Cases Generation	movie_recommendation.json	20.18	14.95	15.29
llama-3b	Cases Generation	multistep_arithmetic_two.json	19.07	15.38	14.87
llama-3b	Cases Generation	navigate.json	19.97	16	15.13
llama-3b	Cases Generation	object_counting.json	20.45	14.99	15.32
llama-3b	Cases Generation	penguins_in_a_table.json	19.98	15.3	14.96
llama-3b	Cases Generation	reasoning_about_colored_objects.json	19.85	15.65	15.13
llama-3b	Cases Generation	ruin_names.json	19.75	14.72	14.28
llama-3b	Cases Generation	salient_translation_error_detection.json	19.9	14.27	14.92
llama-3b	Cases Generation	snarks.json	19.84	15.08	15.16
llama-3b	Cases Generation	sports_understanding.json	19.96	14.99	16.18
llama-3b	Cases Generation	temporal_sequences.json	20.37	15.44	14.95
llama-3b	Cases Generation	tracking_shuffled_objects_five_objects.json	20.05	14.5	16.29
llama-3b	Cases Generation	tracking_shuffled_objects_seven_objects.json	19.94	15.48	15.15
llama-3b	Cases Generation	tracking_shuffled_objects_three_objects.json	20.03	16.27	15.91
llama-3b	Cases Generation	web_of_lies.json	20.32	14.64	15.37
llama-3b	Cases Generation	word_sorting.json	20.13	14.88	15.06
llama-8b	Cases Generation	causal_judgement.json	20.35	15.18	14.77
llama-8b	Cases Generation	date_understanding.json	19.65	14.67	15.73
llama-8b	Cases Generation	disambiguation_qa.json	19.87	15.44	14.54
llama-8b	Cases Generation	dyck_languages.json	19.97	14.48	14.99
llama-8b	Cases Generation	formal_fallacies.json	19.76	14.86	16.02
llama-8b	Cases Generation	geometric_shapes.json	20.49	14.86	14.92
llama-8b	Cases Generation	hyperbaton.json	19.91	14.59	15.95
llama-8b	Cases Generation	logical_deduction_five_objects.json	19.41	15.15	14.77
llama-8b	Cases Generation	logical_deduction_seven_objects.json	20.02	15.28	16.12
llama-8b	Cases Generation	logical_deduction_three_objects.json	19.51	14.6	14.97
llama-8b	Cases Generation	movie_recommendation.json	20.15	14.42	14.8
llama-8b	Cases Generation	multistep_arithmetic_two.json	19.96	13.74	15.05
llama-8b	Cases Generation	navigate.json	20.22	14.99	15.16
llama-8b	Cases Generation	object_counting.json	19.9	16.36	14.42
llama-8b	Cases Generation	penguins_in_a_table.json	21.04	15.46	15.76
llama-8b	Cases Generation	reasoning_about_colored_objects.json	19.32	15.04	14.21
llama-8b	Cases Generation	ruin_names.json	19.93	15.64	14.52
llama-8b	Cases Generation	salient_translation_error_detection.json	20	15.16	14.51
llama-8b	Cases Generation	snarks.json	20.03	14.73	15.06
llama-8b	Cases Generation	sports_understanding.json	20.38	14.89	14.73
llama-8b	Cases Generation	temporal_sequences.json	20.13	14.53	14.47
llama-8b	Cases Generation	tracking_shuffled_objects_five_objects.json	20.72	14.69	14.61
llama-8b	Cases Generation	tracking_shuffled_objects_seven_objects.json	19.91	14.34	14.91
llama-8b	Cases Generation	tracking_shuffled_objects_three_objects.json	19.43	14.94	14.95
llama-8b	Cases Generation	web_of_lies.json	20.11	14.47	14.9
llama-8b	Cases Generation	word_sorting.json	19.85	15.75	13.93
yi-34B	Cases Generation	causal_judgement.json	20.56	15.27	15.57
yi-34B	Cases Generation	date_understanding.json	19.57	14.65	15.9
yi-34B	Cases Generation	disambiguation_qa.json	19.88	14.45	13.53
yi-34B	Cases Generation	dyck_languages.json	20.59	14.5	14.67
yi-34B	Cases Generation	formal_fallacies.json	19.84	14.98	14.55
yi-34B	Cases Generation	geometric_shapes.json	20.11	14.52	14.45
yi-34B	Cases Generation	hyperbaton.json	20.09	14.61	14.3
yi-34B	Cases Generation	logical_deduction_five_objects.json	20.12	15.13	14.44
yi-34B	Cases Generation	logical_deduction_seven_objects.json	20.41	14.93	15.88
yi-34B	Cases Generation	logical_deduction_three_objects.json	19.93	14.21	14.88
yi-34B	Cases Generation	movie_recommendation.json	20.13	15.05	15.05
yi-34B	Cases Generation	multistep_arithmetic_two.json	20.6	14.79	15.38
yi-34B	Cases Generation	navigate.json	20.39	14.56	15.12
yi-34B	Cases Generation	object_counting.json	19.94	14.06	14.69
yi-34B	Cases Generation	penguins_in_a_table.json	20.42	15.85	14.12
yi-34B	Cases Generation	reasoning_about_colored_objects.json	20.44	15.23	14.81
yi-34B	Cases Generation	ruin_names.json	20.18	15.48	14.7
yi-34B	Cases Generation	salient_translation_error_detection.json	19.88	14.48	14.99
yi-34B	Cases Generation	snarks.json	19.65	15.23	15.75
yi-34B	Cases Generation	sports_understanding.json	19.63	14.59	14.35
yi-34B	Cases Generation	temporal_sequences.json	20.73	14.74	15.05
yi-34B	Cases Generation	tracking_shuffled_objects_five_objects.json	20.36	14.34	15.52
yi-34B	Cases Generation	tracking_shuffled_objects_seven_objects.json	19.24	14.29	14.42
yi-34B	Cases Generation	tracking_shuffled_objects_three_objects.json	19.86	15.22	14.8
yi-34B	Cases Generation	web_of_lies.json	19.85	14.6	14.86
yi-34B	Cases Generation	word_sorting.json	19.53	14.84	15.34
qwen-turbo	Cases Generation	causal_judgement.json	20.43	15.15	15.68
qwen-turbo	Cases Generation	date_understanding.json	20.25	14.19	14.97
qwen-turbo	Cases Generation	disambiguation_qa.json	19.71	16.2	15.02
qwen-turbo	Cases Generation	dyck_languages.json	20.51	14.94	14.91
qwen-turbo	Cases Generation	formal_fallacies.json	20.09	14.39	15.51
qwen-turbo	Cases Generation	geometric_shapes.json	20.42	16.23	14.71
qwen-turbo	Cases Generation	hyperbaton.json	20.01	14.42	15.53
qwen-turbo	Cases Generation	logical_deduction_five_objects.json	20.26	14.51	15.27
qwen-turbo	Cases Generation	logical_deduction_seven_objects.json	20.03	14.53	14.67
qwen-turbo	Cases Generation	logical_deduction_three_objects.json	20.42	14.78	15.18
qwen-turbo	Cases Generation	movie_recommendation.json	20.25	15.43	15.47
qwen-turbo	Cases Generation	multistep_arithmetic_two.json	19.56	15.77	14.86
qwen-turbo	Cases Generation	navigate.json	20.06	15.05	14.72
qwen-turbo	Cases Generation	object_counting.json	20.39	16.6	16.1
qwen-turbo	Cases Generation	penguins_in_a_table.json	19.42	14.57	14.49
qwen-turbo	Cases Generation	reasoning_about_colored_objects.json	20.01	14.53	14.97
qwen-turbo	Cases Generation	ruin_names.json	19.6	15.18	14.71
qwen-turbo	Cases Generation	salient_translation_error_detection.json	19.63	15.59	14.14
qwen-turbo	Cases Generation	snarks.json	20.26	14.4	14.91
qwen-turbo	Cases Generation	sports_understanding.json	20.34	15.25	15.13
qwen-turbo	Cases Generation	temporal_sequences.json	18.97	14.72	14.72
qwen-turbo	Cases Generation	tracking_shuffled_objects_five_objects.json	20.09	15.28	14.56
qwen-turbo	Cases Generation	tracking_shuffled_objects_seven_objects.json	19.96	15.3	13.63
qwen-turbo	Cases Generation	tracking_shuffled_objects_three_objects.json	20.4	14.97	15.02
qwen-turbo	Cases Generation	web_of_lies.json	20.06	15.61	14.76
qwen-turbo	Cases Generation	word_sorting.json	19.95	15.08	15.14
qwen-plus	Cases Generation	causal_judgement.json	19.9	14.68	15.19
qwen-plus	Cases Generation	date_understanding.json	20.43	14.7	15.16
qwen-plus	Cases Generation	disambiguation_qa.json	20.02	15.77	15.12
qwen-plus	Cases Generation	dyck_languages.json	19.61	14.16	14.44
qwen-plus	Cases Generation	formal_fallacies.json	19.42	15.22	15.63
qwen-plus	Cases Generation	geometric_shapes.json	20.03	14.35	14.68
qwen-plus	Cases Generation	hyperbaton.json	20.34	15.54	15.1
qwen-plus	Cases Generation	logical_deduction_five_objects.json	19.89	14.35	15.48
qwen-plus	Cases Generation	logical_deduction_seven_objects.json	20.74	15.54	14.92
qwen-plus	Cases Generation	logical_deduction_three_objects.json	19.88	14.77	15.75
qwen-plus	Cases Generation	movie_recommendation.json	20.69	15.62	15.29
qwen-plus	Cases Generation	multistep_arithmetic_two.json	19.89	14.97	14.78
qwen-plus	Cases Generation	navigate.json	20.27	15.41	14.59
qwen-plus	Cases Generation	object_counting.json	20	14.67	15.14
qwen-plus	Cases Generation	penguins_in_a_table.json	19.86	13.93	14.75
qwen-plus	Cases Generation	reasoning_about_colored_objects.json	20.24	15.45	14.89
qwen-plus	Cases Generation	ruin_names.json	20	14.35	15.2
qwen-plus	Cases Generation	salient_translation_error_detection.json	20.52	14.81	15.33
qwen-plus	Cases Generation	snarks.json	19.66	14.74	14.8
qwen-plus	Cases Generation	sports_understanding.json	20.03	14.93	14.61
qwen-plus	Cases Generation	temporal_sequences.json	19.48	14.62	14.93
qwen-plus	Cases Generation	tracking_shuffled_objects_five_objects.json	19.56	14.66	15.14
qwen-plus	Cases Generation	tracking_shuffled_objects_seven_objects.json	20.13	14.63	15.09
qwen-plus	Cases Generation	tracking_shuffled_objects_three_objects.json	19.77	14.28	14.67
qwen-plus	Cases Generation	web_of_lies.json	19.49	15	15.93
qwen-plus	Cases Generation	word_sorting.json	19.48	15.96	15.54
RLP	Patterns Generation	causal_judgement.json	22.55	19.08	19.98
RLP	Patterns Generation	date_understanding.json	22.35	19.98	19.92
RLP	Patterns Generation	disambiguation_qa.json	22.26	20.44	20.35
RLP	Patterns Generation	dyck_languages.json	22.04	20.15	19.42
RLP	Patterns Generation	formal_fallacies.json	22.34	19.79	20.03
RLP	Patterns Generation	geometric_shapes.json	22.62	20.52	20.01
RLP	Patterns Generation	hyperbaton.json	22.29	19.95	20.01
RLP	Patterns Generation	logical_deduction_five_objects.json	22.76	19.55	19.84
RLP	Patterns Generation	logical_deduction_seven_objects.json	22.25	20.05	20.11
RLP	Patterns Generation	logical_deduction_three_objects.json	22.58	19.92	20.11
RLP	Patterns Generation	movie_recommendation.json	22.64	19.55	20.02
RLP	Patterns Generation	multistep_arithmetic_two.json	22.06	20.15	19.53
RLP	Patterns Generation	navigate.json	22.33	19.92	19.79
RLP	Patterns Generation	object_counting.json	22.14	19.69	19.96
RLP	Patterns Generation	penguins_in_a_table.json	22.11	20.01	19.96
RLP	Patterns Generation	reasoning_about_colored_objects.json	22.45	20.73	19.55
RLP	Patterns Generation	ruin_names.json	22.55	19.59	20.16
RLP	Patterns Generation	salient_translation_error_detection.json	22.77	19.94	20.03
RLP	Patterns Generation	snarks.json	23.32	20.57	19.43
RLP	Patterns Generation	sports_understanding.json	22.33	20	19.52
RLP	Patterns Generation	temporal_sequences.json	22.23	19.89	20.16
RLP	Patterns Generation	tracking_shuffled_objects_five_objects.json	23.24	19.88	19.89
RLP	Patterns Generation	tracking_shuffled_objects_seven_objects.json	22.61	19.91	20.32
RLP	Patterns Generation	tracking_shuffled_objects_three_objects.json	22.45	19.46	19.9
RLP	Patterns Generation	web_of_lies.json	22.55	19.66	19.66
RLP	Patterns Generation	word_sorting.json	21.94	19.38	20.91
llama-1b	Patterns Generation	causal_judgement.json	20.21	14.92	14.4
llama-1b	Patterns Generation	date_understanding.json	20.35	15.73	14.49
llama-1b	Patterns Generation	disambiguation_qa.json	20.06	15.47	14.47
llama-1b	Patterns Generation	dyck_languages.json	19.85	15.6	15.99
llama-1b	Patterns Generation	formal_fallacies.json	19.65	14.49	15.92
llama-1b	Patterns Generation	geometric_shapes.json	20.13	14.15	14.93
llama-1b	Patterns Generation	hyperbaton.json	19.73	15.62	15.88
llama-1b	Patterns Generation	logical_deduction_five_objects.json	20.09	15.1	15.65
llama-1b	Patterns Generation	logical_deduction_seven_objects.json	19.89	14.41	14.73
llama-1b	Patterns Generation	logical_deduction_three_objects.json	19.98	15.49	15.8
llama-1b	Patterns Generation	movie_recommendation.json	20.07	14.31	15.64
llama-1b	Patterns Generation	multistep_arithmetic_two.json	19.87	14.62	14.97
llama-1b	Patterns Generation	navigate.json	20.02	14.44	14.74
llama-1b	Patterns Generation	object_counting.json	20.04	14.53	14.46
llama-1b	Patterns Generation	penguins_in_a_table.json	20.03	15.14	13.31
llama-1b	Patterns Generation	reasoning_about_colored_objects.json	19.43	15.69	14.68
llama-1b	Patterns Generation	ruin_names.json	19.44	14.25	15.21
llama-1b	Patterns Generation	salient_translation_error_detection.json	20.01	14.6	15.1
llama-1b	Patterns Generation	snarks.json	19.62	14.64	13.26
llama-1b	Patterns Generation	sports_understanding.json	20.63	14.73	15.01
llama-1b	Patterns Generation	temporal_sequences.json	19.8	15.28	15.3
llama-1b	Patterns Generation	tracking_shuffled_objects_five_objects.json	21.05	14.68	14.5
llama-1b	Patterns Generation	tracking_shuffled_objects_seven_objects.json	20.44	14.52	14.29
llama-1b	Patterns Generation	tracking_shuffled_objects_three_objects.json	20.49	14.95	15.38
llama-1b	Patterns Generation	web_of_lies.json	19.87	15.14	15.05
llama-1b	Patterns Generation	word_sorting.json	20.52	14.55	14.59
llama-3b	Patterns Generation	causal_judgement.json	19.62	14.91	14.05
llama-3b	Patterns Generation	date_understanding.json	20.98	14.9	14.01
llama-3b	Patterns Generation	disambiguation_qa.json	20.69	14.97	14.68
llama-3b	Patterns Generation	dyck_languages.json	20.16	15.43	15.9
llama-3b	Patterns Generation	formal_fallacies.json	19.9	14.05	14.43
llama-3b	Patterns Generation	geometric_shapes.json	19.87	15.25	14.39
llama-3b	Patterns Generation	hyperbaton.json	19.71	14.96	15.04
llama-3b	Patterns Generation	logical_deduction_five_objects.json	20.1	14.88	14.88
llama-3b	Patterns Generation	logical_deduction_seven_objects.json	20.32	14.29	14.54
llama-3b	Patterns Generation	logical_deduction_three_objects.json	19.26	15.25	14.03
llama-3b	Patterns Generation	movie_recommendation.json	20.09	15.27	15.27
llama-3b	Patterns Generation	multistep_arithmetic_two.json	20.42	16.06	15.02
llama-3b	Patterns Generation	navigate.json	20.13	15.95	15.8
llama-3b	Patterns Generation	object_counting.json	20.61	15.8	14.46
llama-3b	Patterns Generation	penguins_in_a_table.json	19.22	14.59	15.03
llama-3b	Patterns Generation	reasoning_about_colored_objects.json	20.29	15.23	15.09
llama-3b	Patterns Generation	ruin_names.json	20.22	15.08	14.76
llama-3b	Patterns Generation	salient_translation_error_detection.json	20.23	14.95	15.21
llama-3b	Patterns Generation	snarks.json	20.54	16.05	14.65
llama-3b	Patterns Generation	sports_understanding.json	20.23	15.17	15.34
llama-3b	Patterns Generation	temporal_sequences.json	20.09	14.96	15.33
llama-3b	Patterns Generation	tracking_shuffled_objects_five_objects.json	20.12	14.95	15.64
llama-3b	Patterns Generation	tracking_shuffled_objects_seven_objects.json	20.01	15.01	15.46
llama-3b	Patterns Generation	tracking_shuffled_objects_three_objects.json	19.99	15.48	15.41
llama-3b	Patterns Generation	web_of_lies.json	20.23	14.56	14.28
llama-3b	Patterns Generation	word_sorting.json	20.19	15.32	14.83
llama-8b	Patterns Generation	causal_judgement.json	19.6	15.15	15.86
llama-8b	Patterns Generation	date_understanding.json	19.69	15.7	15.37
llama-8b	Patterns Generation	disambiguation_qa.json	20.19	15.47	14.62
llama-8b	Patterns Generation	dyck_languages.json	20.07	15.18	15.17
llama-8b	Patterns Generation	formal_fallacies.json	20.23	15.18	15.13
llama-8b	Patterns Generation	geometric_shapes.json	19.95	15.77	14.42
llama-8b	Patterns Generation	hyperbaton.json	20.02	14.57	15.8
llama-8b	Patterns Generation	logical_deduction_five_objects.json	19.92	14.48	14.52
llama-8b	Patterns Generation	logical_deduction_seven_objects.json	20.26	14.76	15.74
llama-8b	Patterns Generation	logical_deduction_three_objects.json	19.77	15.68	14.34
llama-8b	Patterns Generation	movie_recommendation.json	20.59	15.79	15.98
llama-8b	Patterns Generation	multistep_arithmetic_two.json	20.52	14.39	15.37
llama-8b	Patterns Generation	navigate.json	19.94	15.24	15.8
llama-8b	Patterns Generation	object_counting.json	19.36	14.82	14.52
llama-8b	Patterns Generation	penguins_in_a_table.json	19.63	15.35	14.74
llama-8b	Patterns Generation	reasoning_about_colored_objects.json	20.05	15.27	13.98
llama-8b	Patterns Generation	ruin_names.json	20.27	15.53	15.48
llama-8b	Patterns Generation	salient_translation_error_detection.json	19.76	14.69	14.45
llama-8b	Patterns Generation	snarks.json	19.33	14.78	15
llama-8b	Patterns Generation	sports_understanding.json	19.08	14.28	15.03
llama-8b	Patterns Generation	temporal_sequences.json	20.39	15.08	14.49
llama-8b	Patterns Generation	tracking_shuffled_objects_five_objects.json	20.09	15.21	15.51
llama-8b	Patterns Generation	tracking_shuffled_objects_seven_objects.json	19.83	14.69	16.56
llama-8b	Patterns Generation	tracking_shuffled_objects_three_objects.json	19.56	14.61	14.78
llama-8b	Patterns Generation	web_of_lies.json	19.86	14.11	14.44
llama-8b	Patterns Generation	word_sorting.json	20.58	15.61	14.16
yi-34B	Patterns Generation	causal_judgement.json	20.51	15.08	14.57
yi-34B	Patterns Generation	date_understanding.json	19.87	14.37	15
yi-34B	Patterns Generation	disambiguation_qa.json	19.63	16.52	14.11
yi-34B	Patterns Generation	dyck_languages.json	20.04	15.55	14.46
yi-34B	Patterns Generation	formal_fallacies.json	19.82	15.07	16.2
yi-34B	Patterns Generation	geometric_shapes.json	19.59	16.07	15.98
yi-34B	Patterns Generation	hyperbaton.json	20.22	14.44	15.54
yi-34B	Patterns Generation	logical_deduction_five_objects.json	20.09	16.49	14.84
yi-34B	Patterns Generation	logical_deduction_seven_objects.json	20.06	14.27	15.28
yi-34B	Patterns Generation	logical_deduction_three_objects.json	20.25	15.16	14.8
yi-34B	Patterns Generation	movie_recommendation.json	19.91	15.57	15.08
yi-34B	Patterns Generation	multistep_arithmetic_two.json	19.91	14.79	14.88
yi-34B	Patterns Generation	navigate.json	20.76	13.86	15.47
yi-34B	Patterns Generation	object_counting.json	19.83	16.38	15
yi-34B	Patterns Generation	penguins_in_a_table.json	19.95	14.83	15.94
yi-34B	Patterns Generation	reasoning_about_colored_objects.json	20.04	14.82	14.69
yi-34B	Patterns Generation	ruin_names.json	19.81	14.25	14.22
yi-34B	Patterns Generation	salient_translation_error_detection.json	20.32	14.8	15.53
yi-34B	Patterns Generation	snarks.json	20.91	14.9	15.34
yi-34B	Patterns Generation	sports_understanding.json	19.4	14.38	15.19
yi-34B	Patterns Generation	temporal_sequences.json	19.75	13.78	14.78
yi-34B	Patterns Generation	tracking_shuffled_objects_five_objects.json	20.05	14.87	15
yi-34B	Patterns Generation	tracking_shuffled_objects_seven_objects.json	19.53	15.21	14.5
yi-34B	Patterns Generation	tracking_shuffled_objects_three_objects.json	19.55	14.79	15.2
yi-34B	Patterns Generation	web_of_lies.json	20.51	14.3	14.96
yi-34B	Patterns Generation	word_sorting.json	19.46	15.64	14.43
qwen-turbo	Patterns Generation	causal_judgement.json	19.56	15.53	15.74
qwen-turbo	Patterns Generation	date_understanding.json	19.8	14.98	14.97
qwen-turbo	Patterns Generation	disambiguation_qa.json	19.6	15.34	15.36
qwen-turbo	Patterns Generation	dyck_languages.json	20.52	14.17	14.12
qwen-turbo	Patterns Generation	formal_fallacies.json	20.01	14.6	14.98
qwen-turbo	Patterns Generation	geometric_shapes.json	19.43	14.03	14.93
qwen-turbo	Patterns Generation	hyperbaton.json	20.44	14.99	15.35
qwen-turbo	Patterns Generation	logical_deduction_five_objects.json	20.08	14.71	13.99
qwen-turbo	Patterns Generation	logical_deduction_seven_objects.json	20.01	14.76	15.36
qwen-turbo	Patterns Generation	logical_deduction_three_objects.json	19.68	15.22	15.34
qwen-turbo	Patterns Generation	movie_recommendation.json	19.87	15.09	15.38
qwen-turbo	Patterns Generation	multistep_arithmetic_two.json	20.02	15.09	15.08
qwen-turbo	Patterns Generation	navigate.json	20.3	14.06	14.96
qwen-turbo	Patterns Generation	object_counting.json	20.27	14.77	14.56
qwen-turbo	Patterns Generation	penguins_in_a_table.json	20.01	15.02	15.26
qwen-turbo	Patterns Generation	reasoning_about_colored_objects.json	20.23	15.5	14.41
qwen-turbo	Patterns Generation	ruin_names.json	19.68	14.88	15.42
qwen-turbo	Patterns Generation	salient_translation_error_detection.json	20.02	14.53	14.07
qwen-turbo	Patterns Generation	snarks.json	19.83	14.88	15.76
qwen-turbo	Patterns Generation	sports_understanding.json	19.95	14.79	14.97
qwen-turbo	Patterns Generation	temporal_sequences.json	19.01	15.56	14.72
qwen-turbo	Patterns Generation	tracking_shuffled_objects_five_objects.json	20.15	14.68	15.45
qwen-turbo	Patterns Generation	tracking_shuffled_objects_seven_objects.json	20.09	14.62	15.99
qwen-turbo	Patterns Generation	tracking_shuffled_objects_three_objects.json	19.98	15.43	14.49
qwen-turbo	Patterns Generation	web_of_lies.json	20.24	14.12	15.69
qwen-turbo	Patterns Generation	word_sorting.json	20.6	15.48	16.01
qwen-plus	Patterns Generation	causal_judgement.json	20.93	14.38	16
qwen-plus	Patterns Generation	date_understanding.json	20.42	14.71	14.47
qwen-plus	Patterns Generation	disambiguation_qa.json	20.21	14.59	14.93
qwen-plus	Patterns Generation	dyck_languages.json	20.03	14.8	15.42
qwen-plus	Patterns Generation	formal_fallacies.json	19.92	14.52	15.92
qwen-plus	Patterns Generation	geometric_shapes.json	19.87	14.21	14.92
qwen-plus	Patterns Generation	hyperbaton.json	19.95	15.21	14.29
qwen-plus	Patterns Generation	logical_deduction_five_objects.json	20.25	15.53	15.48
qwen-plus	Patterns Generation	logical_deduction_seven_objects.json	18.92	15.86	15.42
qwen-plus	Patterns Generation	logical_deduction_three_objects.json	19.84	16.18	14.9
qwen-plus	Patterns Generation	movie_recommendation.json	19.25	15.52	15.4
qwen-plus	Patterns Generation	multistep_arithmetic_two.json	19.7	14.5	15.15
qwen-plus	Patterns Generation	navigate.json	19.74	15.53	15.54
qwen-plus	Patterns Generation	object_counting.json	20.27	14.5	14.99
qwen-plus	Patterns Generation	penguins_in_a_table.json	19.85	15.26	15.24
qwen-plus	Patterns Generation	reasoning_about_colored_objects.json	20.65	15.14	14.92
qwen-plus	Patterns Generation	ruin_names.json	19.99	14.62	15.24
qwen-plus	Patterns Generation	salient_translation_error_detection.json	20.44	15.52	15.28
qwen-plus	Patterns Generation	snarks.json	19.82	15.48	14.32
qwen-plus	Patterns Generation	sports_understanding.json	20.61	15.37	15.09
qwen-plus	Patterns Generation	temporal_sequences.json	20.48	15	14.69
qwen-plus	Patterns Generation	tracking_shuffled_objects_five_objects.json	20.14	14.82	14.63
qwen-plus	Patterns Generation	tracking_shuffled_objects_seven_objects.json	19.27	15.81	15.63
qwen-plus	Patterns Generation	tracking_shuffled_objects_three_objects.json	20.25	15.16	15.34
qwen-plus	Patterns Generation	web_of_lies.json	20.15	15.63	14.68
qwen-plus	Patterns Generation	word_sorting.json	19.12	15.48	13.27
RLP	Resonableness Generation	causal_judgement.json	22.55	20.39	20.39
RLP	Resonableness Generation	date_understanding.json	22.55	20.67	19.75
RLP	Resonableness Generation	disambiguation_qa.json	22.49	19.68	19.87
RLP	Resonableness Generation	dyck_languages.json	22.79	19.75	20.46
RLP	Resonableness Generation	formal_fallacies.json	22.43	20.02	19.97
RLP	Resonableness Generation	geometric_shapes.json	22.91	20.38	19.9
RLP	Resonableness Generation	hyperbaton.json	22.08	19.67	19.62
RLP	Resonableness Generation	logical_deduction_five_objects.json	22.34	20.37	19.86
RLP	Resonableness Generation	logical_deduction_seven_objects.json	22.43	19.64	19.65
RLP	Resonableness Generation	logical_deduction_three_objects.json	22.75	19.85	20.24
RLP	Resonableness Generation	movie_recommendation.json	22.49	20.03	19.97
RLP	Resonableness Generation	multistep_arithmetic_two.json	22.85	20.32	20.63
RLP	Resonableness Generation	navigate.json	22.51	19.59	20.09
RLP	Resonableness Generation	object_counting.json	22.58	19.04	20.09
RLP	Resonableness Generation	penguins_in_a_table.json	22.51	20.09	20.02
RLP	Resonableness Generation	reasoning_about_colored_objects.json	21.83	19.79	20.12
RLP	Resonableness Generation	ruin_names.json	22.82	20.4	19.83
RLP	Resonableness Generation	salient_translation_error_detection.json	22.87	19.33	20.61
RLP	Resonableness Generation	snarks.json	22.2	19.91	19.51
RLP	Resonableness Generation	sports_understanding.json	22.3	19.98	19.99
RLP	Resonableness Generation	temporal_sequences.json	21.99	19.87	19.72
RLP	Resonableness Generation	tracking_shuffled_objects_five_objects.json	22.58	19.99	20.04
RLP	Resonableness Generation	tracking_shuffled_objects_seven_objects.json	22.77	20.41	19.87
RLP	Resonableness Generation	tracking_shuffled_objects_three_objects.json	22.27	20.41	20.47
RLP	Resonableness Generation	web_of_lies.json	22.77	20.26	20.4
RLP	Resonableness Generation	word_sorting.json	22.4	20.42	20.48
llama-1b	Resonableness Generation	causal_judgement.json	20.91	14.04	15.11
llama-1b	Resonableness Generation	date_understanding.json	20.16	14.94	15.06
llama-1b	Resonableness Generation	disambiguation_qa.json	19.87	14.8	14.85
llama-1b	Resonableness Generation	dyck_languages.json	20.06	15.02	14.63
llama-1b	Resonableness Generation	formal_fallacies.json	19.86	15.63	15.18
llama-1b	Resonableness Generation	geometric_shapes.json	20.54	15.21	15.5
llama-1b	Resonableness Generation	hyperbaton.json	19.99	15.75	14.78
llama-1b	Resonableness Generation	logical_deduction_five_objects.json	19.49	14.97	14.33
llama-1b	Resonableness Generation	logical_deduction_seven_objects.json	20.23	15.96	15.26
llama-1b	Resonableness Generation	logical_deduction_three_objects.json	19.41	13.72	14.42
llama-1b	Resonableness Generation	movie_recommendation.json	19.81	15.59	14.59
llama-1b	Resonableness Generation	multistep_arithmetic_two.json	20.49	14.97	14.27
llama-1b	Resonableness Generation	navigate.json	20.01	14.48	15.75
llama-1b	Resonableness Generation	object_counting.json	19.87	15.4	15.24
llama-1b	Resonableness Generation	penguins_in_a_table.json	20.49	14.22	15.88
llama-1b	Resonableness Generation	reasoning_about_colored_objects.json	20.12	14.36	15.81
llama-1b	Resonableness Generation	ruin_names.json	19.96	15.23	15.35
llama-1b	Resonableness Generation	salient_translation_error_detection.json	20.05	14.83	14.6
llama-1b	Resonableness Generation	snarks.json	19.48	14.44	14.8
llama-1b	Resonableness Generation	sports_understanding.json	19.36	15.84	15.19
llama-1b	Resonableness Generation	temporal_sequences.json	19.94	16.04	14.73
llama-1b	Resonableness Generation	tracking_shuffled_objects_five_objects.json	19.6	15.64	15.18
llama-1b	Resonableness Generation	tracking_shuffled_objects_seven_objects.json	19.52	15.54	14.55
llama-1b	Resonableness Generation	tracking_shuffled_objects_three_objects.json	20.71	15.18	15.28
llama-1b	Resonableness Generation	web_of_lies.json	19.33	15.06	14.74
llama-1b	Resonableness Generation	word_sorting.json	20.01	14.74	14.38
llama-3b	Resonableness Generation	causal_judgement.json	19.38	15.49	15.04
llama-3b	Resonableness Generation	date_understanding.json	19.84	15.8	14.91
llama-3b	Resonableness Generation	disambiguation_qa.json	19.78	14.86	15.1
llama-3b	Resonableness Generation	dyck_languages.json	19.85	15.29	14
llama-3b	Resonableness Generation	formal_fallacies.json	19.53	15.21	14.98
llama-3b	Resonableness Generation	geometric_shapes.json	20.45	15.62	15.32
llama-3b	Resonableness Generation	hyperbaton.json	19.82	14.24	14.21
llama-3b	Resonableness Generation	logical_deduction_five_objects.json	19.36	14.81	14.6
llama-3b	Resonableness Generation	logical_deduction_seven_objects.json	19.71	16.03	14.85
llama-3b	Resonableness Generation	logical_deduction_three_objects.json	20.82	15.73	15.02
llama-3b	Resonableness Generation	movie_recommendation.json	19.84	15.37	15.22
llama-3b	Resonableness Generation	multistep_arithmetic_two.json	19.89	14.91	15.65
llama-3b	Resonableness Generation	navigate.json	19.9	14.74	14.48
llama-3b	Resonableness Generation	object_counting.json	19.96	14.42	14.54
llama-3b	Resonableness Generation	penguins_in_a_table.json	20.26	14.85	15.05
llama-3b	Resonableness Generation	reasoning_about_colored_objects.json	19.52	14.36	15.9
llama-3b	Resonableness Generation	ruin_names.json	20.69	14.3	15.18
llama-3b	Resonableness Generation	salient_translation_error_detection.json	20.01	14.63	14.41
llama-3b	Resonableness Generation	snarks.json	20.58	15.52	15.5
llama-3b	Resonableness Generation	sports_understanding.json	20.31	15.66	15.27
llama-3b	Resonableness Generation	temporal_sequences.json	20.16	14.81	14.93
llama-3b	Resonableness Generation	tracking_shuffled_objects_five_objects.json	19.63	15.02	14.38
llama-3b	Resonableness Generation	tracking_shuffled_objects_seven_objects.json	20.25	14	14.68
llama-3b	Resonableness Generation	tracking_shuffled_objects_three_objects.json	20.23	15.25	14.94
llama-3b	Resonableness Generation	web_of_lies.json	20.05	15.21	15.54
llama-3b	Resonableness Generation	word_sorting.json	20.34	14.77	15.86
llama-8b	Resonableness Generation	causal_judgement.json	19.79	14.37	16.06
llama-8b	Resonableness Generation	date_understanding.json	20.49	15.03	15.54
llama-8b	Resonableness Generation	disambiguation_qa.json	20.15	14.37	15.58
llama-8b	Resonableness Generation	dyck_languages.json	20.33	15.56	14.13
llama-8b	Resonableness Generation	formal_fallacies.json	19.91	14.95	15.29
llama-8b	Resonableness Generation	geometric_shapes.json	20.54	15.1	15.6
llama-8b	Resonableness Generation	hyperbaton.json	20.04	14.9	15.53
llama-8b	Resonableness Generation	logical_deduction_five_objects.json	19.73	15.05	14.25
llama-8b	Resonableness Generation	logical_deduction_seven_objects.json	19.84	15.44	15.47
llama-8b	Resonableness Generation	logical_deduction_three_objects.json	19.81	14.89	14.72
llama-8b	Resonableness Generation	movie_recommendation.json	19.89	14.34	15.32
llama-8b	Resonableness Generation	multistep_arithmetic_two.json	19.93	14.77	15.09
llama-8b	Resonableness Generation	navigate.json	20.39	15.35	15.4
llama-8b	Resonableness Generation	object_counting.json	19.91	15.15	14.61
llama-8b	Resonableness Generation	penguins_in_a_table.json	20.05	14.83	13.99
llama-8b	Resonableness Generation	reasoning_about_colored_objects.json	19.96	14.96	15.82
llama-8b	Resonableness Generation	ruin_names.json	19.66	15.38	14.95
llama-8b	Resonableness Generation	salient_translation_error_detection.json	20.14	15.49	15.07
llama-8b	Resonableness Generation	snarks.json	19.68	15.1	14.92
llama-8b	Resonableness Generation	sports_understanding.json	20.02	14.79	15.38
llama-8b	Resonableness Generation	temporal_sequences.json	19.69	14.82	15.1
llama-8b	Resonableness Generation	tracking_shuffled_objects_five_objects.json	19.63	16.09	15.28
llama-8b	Resonableness Generation	tracking_shuffled_objects_seven_objects.json	20.4	15.38	15.48
llama-8b	Resonableness Generation	tracking_shuffled_objects_three_objects.json	20.26	14.75	15.92
llama-8b	Resonableness Generation	web_of_lies.json	19.83	13.83	15.44
llama-8b	Resonableness Generation	word_sorting.json	20.03	14.31	15.62
yi-34B	Resonableness Generation	causal_judgement.json	20.27	15.33	14.97
yi-34B	Resonableness Generation	date_understanding.json	20.21	15.95	15.18
yi-34B	Resonableness Generation	disambiguation_qa.json	19.34	15.38	14.52
yi-34B	Resonableness Generation	dyck_languages.json	19.73	14.66	14.58
yi-34B	Resonableness Generation	formal_fallacies.json	19.76	14.16	15.67
yi-34B	Resonableness Generation	geometric_shapes.json	19.33	15.33	15.28
yi-34B	Resonableness Generation	hyperbaton.json	20.23	15.45	14.55
yi-34B	Resonableness Generation	logical_deduction_five_objects.json	19.51	15.29	14.41
yi-34B	Resonableness Generation	logical_deduction_seven_objects.json	20.14	14.17	15.17
yi-34B	Resonableness Generation	logical_deduction_three_objects.json	20.43	14.56	15.09
yi-34B	Resonableness Generation	movie_recommendation.json	20.04	15.05	14.85
yi-34B	Resonableness Generation	multistep_arithmetic_two.json	20.46	14.91	15.5
yi-34B	Resonableness Generation	navigate.json	20.53	15.46	15.51
yi-34B	Resonableness Generation	object_counting.json	20.33	13.41	14.85
yi-34B	Resonableness Generation	penguins_in_a_table.json	19.95	15.01	16.27
yi-34B	Resonableness Generation	reasoning_about_colored_objects.json	19.67	15.05	15.35
yi-34B	Resonableness Generation	ruin_names.json	19.66	15.13	14.34
yi-34B	Resonableness Generation	salient_translation_error_detection.json	20.63	14.6	14.07
yi-34B	Resonableness Generation	snarks.json	19.96	15.21	15.64
yi-34B	Resonableness Generation	sports_understanding.json	20	15	14.04
yi-34B	Resonableness Generation	temporal_sequences.json	20.46	15.87	13.95
yi-34B	Resonableness Generation	tracking_shuffled_objects_five_objects.json	19.72	14.55	15.56
yi-34B	Resonableness Generation	tracking_shuffled_objects_seven_objects.json	19.74	15.26	15.54
yi-34B	Resonableness Generation	tracking_shuffled_objects_three_objects.json	20.12	15.05	15.44
yi-34B	Resonableness Generation	web_of_lies.json	20.82	15.7	14.21
yi-34B	Resonableness Generation	word_sorting.json	20.06	14.69	14.84
qwen-turbo	Resonableness Generation	causal_judgement.json	19.83	13.72	15.7
qwen-turbo	Resonableness Generation	date_understanding.json	19.8	16.06	14.81
qwen-turbo	Resonableness Generation	disambiguation_qa.json	19.77	14.56	15.36
qwen-turbo	Resonableness Generation	dyck_languages.json	20.38	14.92	15.08
qwen-turbo	Resonableness Generation	formal_fallacies.json	19.58	14.82	15.38
qwen-turbo	Resonableness Generation	geometric_shapes.json	20	15.74	14.29
qwen-turbo	Resonableness Generation	hyperbaton.json	20.05	14.5	14.72
qwen-turbo	Resonableness Generation	logical_deduction_five_objects.json	20.15	15.63	14.35
qwen-turbo	Resonableness Generation	logical_deduction_seven_objects.json	19.52	14.77	15.15
qwen-turbo	Resonableness Generation	logical_deduction_three_objects.json	20.32	14.52	15.66
qwen-turbo	Resonableness Generation	movie_recommendation.json	19.96	14.29	15.57
qwen-turbo	Resonableness Generation	multistep_arithmetic_two.json	20.51	14.82	14.95
qwen-turbo	Resonableness Generation	navigate.json	19.61	15.46	16.07
qwen-turbo	Resonableness Generation	object_counting.json	19.03	13.9	14.31
qwen-turbo	Resonableness Generation	penguins_in_a_table.json	20.21	14.93	14.98
qwen-turbo	Resonableness Generation	reasoning_about_colored_objects.json	20.3	14.55	14.18
qwen-turbo	Resonableness Generation	ruin_names.json	20.36	14.63	14.98
qwen-turbo	Resonableness Generation	salient_translation_error_detection.json	19.9	15.06	14.78
qwen-turbo	Resonableness Generation	snarks.json	20.45	14.46	14.64
qwen-turbo	Resonableness Generation	sports_understanding.json	20.63	15.41	14.53
qwen-turbo	Resonableness Generation	temporal_sequences.json	20.05	14.38	15
qwen-turbo	Resonableness Generation	tracking_shuffled_objects_five_objects.json	20.25	15.32	15.27
qwen-turbo	Resonableness Generation	tracking_shuffled_objects_seven_objects.json	19.94	15.46	15.7
qwen-turbo	Resonableness Generation	tracking_shuffled_objects_three_objects.json	20.32	15.9	14.81
qwen-turbo	Resonableness Generation	web_of_lies.json	20.17	15.42	15.8
qwen-turbo	Resonableness Generation	word_sorting.json	20.14	15.09	15.64
qwen-plus	Resonableness Generation	causal_judgement.json	20.73	14.9	15.34
qwen-plus	Resonableness Generation	date_understanding.json	19.78	14.51	14.64
qwen-plus	Resonableness Generation	disambiguation_qa.json	20.21	15	15.37
qwen-plus	Resonableness Generation	dyck_languages.json	20.38	15.31	14.82
qwen-plus	Resonableness Generation	formal_fallacies.json	19.89	15	15.88
qwen-plus	Resonableness Generation	geometric_shapes.json	20.01	15.03	15.3
qwen-plus	Resonableness Generation	hyperbaton.json	20.64	14.46	14.81
qwen-plus	Resonableness Generation	logical_deduction_five_objects.json	20.36	14.66	14.1
qwen-plus	Resonableness Generation	logical_deduction_seven_objects.json	19.72	15.21	15.33
qwen-plus	Resonableness Generation	logical_deduction_three_objects.json	20.11	14.11	15.57
qwen-plus	Resonableness Generation	movie_recommendation.json	19.42	15.08	14.83
qwen-plus	Resonableness Generation	multistep_arithmetic_two.json	19.64	13.98	14.26
qwen-plus	Resonableness Generation	navigate.json	19.77	15.33	14.64
qwen-plus	Resonableness Generation	object_counting.json	19.89	15.13	15.69
qwen-plus	Resonableness Generation	penguins_in_a_table.json	19.51	16.04	15.24
qwen-plus	Resonableness Generation	reasoning_about_colored_objects.json	20.08	16.7	14.43
qwen-plus	Resonableness Generation	ruin_names.json	19.86	15.48	15.12
qwen-plus	Resonableness Generation	salient_translation_error_detection.json	19.63	14.95	15.66
qwen-plus	Resonableness Generation	snarks.json	20.73	14.66	16.6
qwen-plus	Resonableness Generation	sports_understanding.json	20.18	15.52	14.43
qwen-plus	Resonableness Generation	temporal_sequences.json	20.32	14.75	15.3
qwen-plus	Resonableness Generation	tracking_shuffled_objects_five_objects.json	19.54	15.27	15.1
qwen-plus	Resonableness Generation	tracking_shuffled_objects_seven_objects.json	19.65	15.41	15.86
qwen-plus	Resonableness Generation	tracking_shuffled_objects_three_objects.json	20.32	15.24	15.37
qwen-plus	Resonableness Generation	web_of_lies.json	19.62	15.22	14.17
qwen-plus	Resonableness Generation	word_sorting.json	20.04	15.34	15.25

## Sheet: Comparison of metrics correspon
model	bie	task_gen	jina-score	bleu-score	bert-score			task_gen	llama-1bCoTs Generation	llama-1bCases Generation	llama-1bPatterns Generation	llama-1bResonableness Generation	llama-3bCoTs Generation	llama-3bCases Generation	llama-3bPatterns Generation	llama-3bResonableness Generation	llama-8bCoTs Generation	llama-8bCases Generation	llama-8bPatterns Generation	llama-8bResonableness Generation	qwen-plusCoTs Generation	qwen-plusCases Generation	qwen-plusPatterns Generation	qwen-plusResonableness Generation	qwen-turboCoTs Generation	qwen-turboCases Generation	qwen-turboPatterns Generation	qwen-turboResonableness Generation	RLPCoTs Generation	RLPCases Generation	RLPPatterns Generation	RLPResonableness Generation	yi-34BCoTs Generation	yi-34BCases Generation	yi-34BPatterns Generation	yi-34BResonableness Generation
llama-1b	Co	llama-1bCoTs Generation	20.03	15.17	15			jina-score	20.03	20	19.98	19.96	19.98	20.06	20.03	19.97	19.88	19.98	20.08	19.93	20.13	19.97	20	19.97	20.05	20.07	19.98	20	22.43	22.44	22.54	22.58	19.94	19.91	19.85	20.03
llama-1b	Ca	llama-1bCases Generation	20	14.74	15.02			bleu-score	15.17	14.74	15.07	15.21	14.86	15.11	15.04	14.96	15.09	14.9	14.95	15.11	14.89	14.94	14.95	15.13	15.15	15.1	15.09	15.03	20.01	20.07	20.06	20.02	15.07	15.05	14.95	14.87
llama-1b	Pa	llama-1bPatterns Generation	19.98	15.07	15.08			bert-score	15	15.02	15.08	14.91	15.08	14.98	15.06	15	14.98	15.01	15.07	14.95	15.07	15.04	15.05	15.01	14.96	15.01	14.77	14.98	19.97	20.01	19.96	20.05	15.03	14.92	14.96	15.08
llama-1b	Re	llama-1bResonableness Generation	19.96	15.21	14.91
llama-3b	Co	llama-3bCoTs Generation	19.98	14.86	15.08
llama-3b	Ca	llama-3bCases Generation	20.06	15.11	14.98
llama-3b	Pa	llama-3bPatterns Generation	20.03	15.04	15.06
llama-3b	Re	llama-3bResonableness Generation	19.97	14.96	15
llama-8b	Co	llama-8bCoTs Generation	19.88	15.09	14.98
llama-8b	Ca	llama-8bCases Generation	19.98	14.9	15.01
llama-8b	Pa	llama-8bPatterns Generation	20.08	14.95	15.07
llama-8b	Re	llama-8bResonableness Generation	19.93	15.11	14.95
qwen-plus	Co	qwen-plusCoTs Generation	20.13	14.89	15.07
qwen-plus	Ca	qwen-plusCases Generation	19.97	14.94	15.04
qwen-plus	Pa	qwen-plusPatterns Generation	20	14.95	15.05
qwen-plus	Re	qwen-plusResonableness Generation	19.97	15.13	15.01
qwen-turbo	Co	qwen-turboCoTs Generation	20.05	15.15	14.96
qwen-turbo	Ca	qwen-turboCases Generation	20.07	15.1	15.01
qwen-turbo	Pa	qwen-turboPatterns Generation	19.98	15.09	14.77
qwen-turbo	Re	qwen-turboResonableness Generation	20	15.03	14.98
RLP	Co	RLPCoTs Generation	22.43	20.01	19.97
RLP	Ca	RLPCases Generation	22.44	20.07	20.01
RLP	Pa	RLPPatterns Generation	22.54	20.06	19.96
RLP	Re	RLPResonableness Generation	22.58	20.02	20.05
yi-34B	Co	yi-34BCoTs Generation	19.94	15.07	15.03
yi-34B	Ca	yi-34BCases Generation	19.91	15.05	14.92
yi-34B	Pa	yi-34BPatterns Generation	19.85	14.95	14.96
yi-34B	Re	yi-34BResonableness Generation	20.03	14.87	15.08
